# Supplementary material for: Comparative proteomic analysis provides insights into wood formation in immature xylem at different ages in Eucalyptus urophylla × Eucalyptus grandis
Source: Front Plant Sci. 2024 Oct 30;15:1431164. doi: 10.3389/fpls.2024.1431164 (PMC11557400; doi:10.3389/fpls.2024.1431164)
Supplement: Supplementary file 2 [file Table1.xlsx]

## Sheet: Supplementary Table 1
Supplementary Table 1. Details information of the tree samples.
No.	DBH	Height
UG3Y-1	14.9	16.3
UG3Y-2	15.2	15.5
UG3Y-3	13.8	16
UG6Y-1	17.1	17.5
UG6Y-2	17	17.4
UG6Y-3	20.2	18.2
UG9Y-1	23.1	19.2
UG9Y-2	24	18.3
UG9Y-3	25.1	19.1
UG11Y-1	26.8	22.5
UG11Y-2	26.3	23.5
UG11Y-3	28.8	23.4
Note: The protein extraction data indicated that the protein quality of UG11Y-1 did not meet the requirements for subsequent experiments, consequently excluding it from both proteomic analysis and qPCR analysis in this study.

## Sheet: Supplementary Table 2
Supplementary Table 2. Details of the primers for the 50 protein-coding genes.
Gene Code	Primer (5’-3’)	Fragment size/bp
F01_transcript_21425	F: ACCATGCAAATCACCATTGGG	115
	R: CCTTTCCGAGATTTCATAGAACACA
F01_transcript_21518	F: GTTCATAGCCAAACAGGTGGT	121
	R: CGTAGCTAACTTGGCCCTGA
F01_transcript_23816	F: CCTCCGAACTGTACAAACGC	185
	R: GACAACTCTTGCTCTTCCCAG
F01_transcript_28054	F: GAGAGCAGATGCGAAGGCA	193
	R: ACGAGGGATTACAATTCGTGTAGG
F01_transcript_28275	F: GTGGATGTCGCTGGAGTAAG	112
	R: CTTCTGTCTGGTGGCTTGTG
F01_transcript_29992	F: AGCACTGGTCTCCAAGTTCG	170
	R: TGCCACACACAGTAATCATTCATC
F01_transcript_36038	F: GACCAAGGAGCCCAAGTCTC	115
	R: CGGCAGACATTCAAACTATAAGAAC
F01_transcript_4274	F: ATTCGTGAGCAAATCCGATGC	101
	R: CGGCTTGAGATCCTTGATAAACA
F01_transcript_66946	F: CCGAGGCAAATCAACAAACCA	152
	R: GTTTGGCTCAGTTGCGAGTT
F01_transcript_6740	F: CTAAATGTGTTCTCGCCTCGG	141
	R: TTGACTCCCGCTTCTGCAAG
F01_transcript_110872	F: TTGCTACGGATAATGTTGTG	170
	R: TGTGTCTCTGGTGAAGGA
F01_transcript_18561	F: GTGAAGAAGGAGGAGGAAG	108
	R: TTGTAGACGACGCCATAC
F01_transcript_23386	F: CATAACGGAGGAAGCAGAA	182
	R: AGAGGAAGGTGACGAGAG
F01_transcript_2952	F: GCATAGAGAATAGGAGTGTGA	188
	R: ATCGTGGTGTCGTTGATG
F01_transcript_3305	F: AGGAAGGAGGAAGAACCAA	108
	R: ATGCTGTGCGTTAGAATGA
F01_transcript_46705	F: ATGTTTCCCACGAGTGAG	80
	R: TGTAGCCAAGCAGATTCTT
F01_transcript_4888	F: TCAAGGTTCACAAGCAAGA	92
	R: TTCGTCCAGTTCGGTTATC
F01_transcript_86312	F: CATAACGGAAGAAGCAGAAG	182
	R: AGAGGAAGGTGACGAGAG
F01_transcript_97032	F: AGTTCCTCCATCTGTCCAA	185
	R: ATCCTTAACCACCTTACTGAG
F01_transcript_99127	F: AGAGGTGGAGAGGAGGAT	195
	R: AATGCGGAGGACTTCAAG
F01_transcript_103117	F: ATCTGGTGGTGGTTCCTT	160
	R: TCACTTCTGTCCTTCATCTG
F01_transcript_116943	F: AAGATGGTGCTGGTTGTG	109
	R: TTGTTGTTGCGGTTGAGA
F01_transcript_21735	F: ACAACAACCGCCAATTCT	147
	R: GTCCTTGAGCAGTAACCAT
F01_transcript_29263	F: CGTTGATGGTGAGTTGTATT	188
	R: ATAAGATGCGTCAGTCTCC
F01_transcript_32721	F: GATGAAGTGGTGGTGAAGT	110
	R: AATGTAGACGCAGTAGATGG
F01_transcript_33626	F: GCCGTCAAGATTCCAACT	162
	R: ATTATACCTCACACTCCATCC
F01_transcript_34728	F: GCTAAGGTTGTGGTTGAGT	152
	R: AGTGCTGGTGGAGACATT
F01_transcript_4077	F: GAGCAGCGTCTAATGGTT	120
	R: CGTGGCGATGTTAAGTTG
F01_transcript_62437	F: TCATCGCCATTGTCATCC	143
	R: CATCAGCCAGTAAGCATTG
F01_transcript_63492	F: CGACTGTTGCTGTGAATG	172
	R: CGGTTGGTGTGAGTGTAG
F01_transcript_71448	F: CCTCTATGTTGTCCTTGTTATC	200
	R: GGCTGTGTTCTTCTGCTAA
F01_transcript_77387	F: CCATTGTCCAGACCAACTAT	158
	R: GACTCTCCTCACCAACTTAC
F01_transcript_88135	F: CTTGTTGGTGTGGTTGGA	82
	R: CCTTGATGCCTCTGATTGA
F01_transcript_1184	F: CGTTCCTCACCTACCTCT	81
	R: GCTCAATACCAGACCACTT
F01_transcript_1311	F: ATGCTGATGCTGATGATAGT	166
	R: CGAGGAATATGGTTGTGAGA
F01_transcript_16902	F: TGTGCTTGCTTGGTTATCT	160
	R: TGCTGCTCCTGAATCAAC
F01_transcript_17905	F: TTCTGGAGATGGTCGCTAT	200
	R: GATTGTGGCTTGCTGTCA
F01_transcript_25978	F: CTTGGCGAACTATCTTGGT	172
	R: AAGGCAGAACTTAGCATCC
F01_transcript_3306	F: CTGGTGGCGTAATGAACA	197
	R: TTAGAGTGGTTGGTGGTATG
F01_transcript_11750	F: CGCTTCCATTGTCCTGTA	173
	R: CCAAGATGTGCTCCATTATAG
F01_transcript_22293	F: GCATAGCCAAGCACAATC	139
	R: TAGTAGCGACCAGGAGTT
F01_transcript_28138	F: TTGGCTCATCTTGCTGTC	141
	R: AACATCGCTCACATACCTT
F01_transcript_33235	F: CATCAACGCCAAGAACAC	82
	R: GTCATCAGGAAGAGCAAGG
F01_transcript_33724	F: CCAACAACAAGTTCACCTAC	165
	R: TTCCACCGCCATATCTCT
F01_transcript_34143	F: CATCAACGCCAAGAACAC	82
	R: GTCATCAGGAAGAGCAAGA
F01_transcript_62083	F: CTCAGGCTCAAGACTTCAG	200
	R: TTCAAGGCAGGTTCATAAGA
F01_transcript_65662	F: CGCTTCCATTGTCCTGTA	173
	R: CCAAGATGTGCTCCATTATAG
F01_transcript_81581	F: TTGTCATCACCAGGATCG	168
	R: GCCACTTGTCATTCTTGTC
F01_transcript_26955	F: AGGTAGAAGTAGGAAGCAATC	190
	R: CCATCTGTCTCGGCAATC
F01_transcript_30709	F: CTGGTGATGATGAGGAGTC	188
	R: GGAGAGCGAAGTCAAGTT

## Sheet: Supplementary Table 3
Supplementary Table 3. GO annotation of all proteins.
#GO_classify1	GO_classify2	All
#Total_protein		4104
cellular component	extracellular region	105
	cell	2598
	nucleoid	2
	membrane	1488
	virion	32
	cell junction	157
	membrane-enclosed lumen	124
	macromolecular complex	745
	organelle	1817
	extracellular region part	12
	organelle part	1032
	virion part	32
	membrane part	1148
	cell part	2583
	supramolecular complex	33
molecular function	transcription factor activity, protein binding	18
	nucleic acid binding transcription factor activity	14
	catalytic activity	2450
	signal transducer activity	48
	structural molecule activity	199
	transporter activity	218
	binding	2059
	electron carrier activity	37
	antioxidant activity	47
	metallochaperone activity	1
	protein tag	3
	nutrient reservoir activity	5
	molecular transducer activity	17
	molecular function regulator	78
biological process	reproduction	97
	immune system process	24
	metabolic process	2470
	cellular process	2336
	reproductive process	96
	biological adhesion	2
	signaling	168
	multicellular organismal process	136
	developmental process	175
	growth	38
	locomotion	3
	single-organism process	1753
	rhythmic process	3
	response to stimulus	547
	localization	530
	multi-organism process	63
	biological regulation	657
	cellular component organization or biogenesis	484
	detoxification	51

## Sheet: Supplementary Table 4
Supplementary Table 4. KEGG pathway annotation of all proteins.
pathway	pathway id	Protein number	Accession	KOs
Glycolysis / Gluconeogenesis	ko00010	94	F01_transcript_100503;F01_transcript_101033;F01_transcript_101698;F01_transcript_107020;F01_transcript_108604;F01_transcript_110491;F01_transcript_111112;F01_transcript_111984;F01_transcript_112175;F01_transcript_112578;F01_transcript_113230;F01_transcript_115064;F01_transcript_116717;F01_transcript_117719;F01_transcript_117782;F01_transcript_117979;F01_transcript_13380;F01_transcript_13404;F01_t…	K00134+K00121+K15633+K03841+K01792+K01689+K00844+K01834+K00382+K01689+K18857+K00134+K00134+K01623+K00627+K00895+K01610+K01623+K00627+K01810+K01810+K01568+K00873+K01568+K01835+K00850+K00873+K00927+K01835+K00873+K15633+K01568+K01835+K01810+K00873+K00873+K00382+K01568+K00850+K00134+K00850+K01835+K00850+K00873+K00873+K00873+K01689+K00850+K14085+K00162+K01623+K18857+K00162+K18857+K00161+K01792+K01623+…
Citrate cycle (TCA cycle)	ko00020	39	F01_transcript_105827;F01_transcript_111336;F01_transcript_112175;F01_transcript_11310;F01_transcript_117782;F01_transcript_13380;F01_transcript_13888;F01_transcript_1457;F01_transcript_14638;F01_transcript_15968;F01_transcript_19669;F01_transcript_20771;F01_transcript_21275;F01_transcript_21354;F01_transcript_23582;F01_transcript_23674;F01_transcript_24052;F01_transcript_24971;F01_transcript_262…	K01648+K01679+K00382+K00234+K00627+K01610+K01648+K00164+K00627+K01648+K00382+K01679+K01647+K01900+K00031+K00162+K01647+K01648+K00162+K00161+K01648+K00030+K00026+K00025+K00026+K01899+K01681+K01681+K00235+K00026+K00627+K01681+K00030+K00026+K01899+K00658+K00161+K00161+K00030
Pentose phosphate pathway	ko00030	35	F01_transcript_107020;F01_transcript_117719;F01_transcript_117979;F01_transcript_118551;F01_transcript_13404;F01_transcript_14798;F01_transcript_15313;F01_transcript_16902;F01_transcript_17221;F01_transcript_17905;F01_transcript_18483;F01_transcript_18667;F01_transcript_19972;F01_transcript_20395;F01_transcript_21079;F01_transcript_21278;F01_transcript_21346;F01_transcript_21554;F01_transcript_23…	K03841+K01623+K00895+K00616+K01623+K01810+K01810+K01835+K00850+K01835+K01835+K01810+K00036+K00850+K00850+K01835+K00850+K00036+K00850+K01623+K00948+K00616+K01623+K01057+K01807+K01057+K01057+K01783+K00852+K01835+K01057+K00850+K00895+K00131+K01810
Pentose and glucuronate interconversions	ko00040	21	F01_transcript_100957;F01_transcript_11317;F01_transcript_17069;F01_transcript_19951;F01_transcript_20557;F01_transcript_21425;F01_transcript_21735;F01_transcript_22035;F01_transcript_24256;F01_transcript_26188;F01_transcript_29507;F01_transcript_30405;F01_transcript_33938;F01_transcript_49359;F01_transcript_62382;F01_transcript_63492;F01_transcript_75161;F01_transcript_78946;F01_transcript_89004…	K00963+K00963+K12447+K00854+K00963+K01051+K01051+K00012+K01805+K01728+K16190+K01051+K01783+K00128+K01805+K01051+K00008+K00008+K00128+K01728+K00128
Fructose and mannose metabolism	ko00051	35	F01_transcript_107020;F01_transcript_111112;F01_transcript_117719;F01_transcript_117979;F01_transcript_13404;F01_transcript_17221;F01_transcript_18641;F01_transcript_20395;F01_transcript_21079;F01_transcript_21346;F01_transcript_23023;F01_transcript_24256;F01_transcript_24445;F01_transcript_24469;F01_transcript_25293;F01_transcript_25298;F01_transcript_26381;F01_transcript_28462;F01_transcript_29…	K03841+K00844+K01623+K00895+K01623+K00850+K00966+K00850+K00850+K00850+K00850+K01805+K00847+K01711+K01623+K00966+K19355+K01623+K02377+K00847+K01803+K17497+K05305+K01803+K00844+K01805+K19355+K00966+K00850+K00895+K00008+K01803+K00847+K00008+K01103
Galactose metabolism	ko00052	31	F01_transcript_100957;F01_transcript_10645;F01_transcript_107787;F01_transcript_111112;F01_transcript_111798;F01_transcript_112869;F01_transcript_11317;F01_transcript_14919;F01_transcript_16902;F01_transcript_17069;F01_transcript_17221;F01_transcript_17905;F01_transcript_18483;F01_transcript_20395;F01_transcript_20557;F01_transcript_21079;F01_transcript_21278;F01_transcript_21346;F01_transcript_2…	K00963+K12309+K18819+K00844+K01784+K01193+K00963+K07407+K01835+K12447+K00850+K01835+K01835+K00850+K00963+K00850+K01835+K00850+K01190+K00850+K07407+K01785+K00965+K01835+K00844+K06617+K06617+K00850+K01187+K01785+K01784
Ascorbate and aldarate metabolism	ko00053	22	F01_transcript_17069;F01_transcript_17246;F01_transcript_22035;F01_transcript_23064;F01_transcript_24285;F01_transcript_25444;F01_transcript_27546;F01_transcript_28048;F01_transcript_29507;F01_transcript_31740;F01_transcript_31791;F01_transcript_32317;F01_transcript_32581;F01_transcript_32677;F01_transcript_33023;F01_transcript_49359;F01_transcript_54283;F01_transcript_64201;F01_transcript_71382;…	K12447+K00225+K00012+K14085+K08232+K10046+K08232+K00434+K16190+K00434+K00434+K10047+K00434+K10047+K00434+K00128+K10046+K18649+K00434+K08232+K00128+K00128
Fatty acid biosynthesis	ko00061	29	F01_transcript_104539;F01_transcript_110995;F01_transcript_11156;F01_transcript_114304;F01_transcript_11858;F01_transcript_12253;F01_transcript_12945;F01_transcript_12964;F01_transcript_15229;F01_transcript_20122;F01_transcript_25239;F01_transcript_25610;F01_transcript_26;F01_transcript_26735;F01_transcript_28276;F01_transcript_33231;F01_transcript_33487;F01_transcript_33860;F01_transcript_41324;…	K00208+K00648+K01897+K02160+K01897+K09458+K01897+K01897+K01897+K01961+K00208+K03921+K11262+K00645+K00059+K00059+K00059+K00059+K00059+K11262+K01897+K01897+K03921+K02372+K10782+K01962+K00059+K01897+K09458
Fatty acid elongation	ko00062	8	F01_transcript_108812;F01_transcript_112650;F01_transcript_26389;F01_transcript_28176;F01_transcript_29735;F01_transcript_42027;F01_transcript_64339;F01_transcript_82955;	K10258+K15397+K10251+K10251+K01074+K01074+K01068+K01068
Fatty acid degradation	ko00071	38	F01_transcript_101033;F01_transcript_10182;F01_transcript_11156;F01_transcript_11257;F01_transcript_113230;F01_transcript_11387;F01_transcript_11858;F01_transcript_12134;F01_transcript_12945;F01_transcript_12964;F01_transcript_15229;F01_transcript_15259;F01_transcript_15275;F01_transcript_23064;F01_transcript_25304;F01_transcript_25930;F01_transcript_25997;F01_transcript_26700;F01_transcript_2687…	K00121+K10527+K01897+K10527+K18857+K10527+K01897+K00232+K01897+K01897+K01897+K00232+K10527+K14085+K18857+K00626+K07513+K18857+K00626+K00232+K00626+K00001+K00121+K00121+K07513+K00001+K01897+K00128+K18857+K00121+K01897+K01897+K07513+K00128+K00626+K18857+K10527+K00128
Synthesis and degradation of ketone bodies	ko00072	4	F01_transcript_25930;F01_transcript_26877;F01_transcript_28632;F01_transcript_91404;	K00626+K00626+K00626+K00626
Cutin, suberine and wax biosynthesis	ko00073	4	F01_transcript_25200;F01_transcript_27575;F01_transcript_33022;F01_transcript_62658;	K15400+K15400+K17991+K15400
Steroid biosynthesis	ko00100	8	F01_transcript_110112;F01_transcript_116147;F01_transcript_116444;F01_transcript_14920;F01_transcript_29036;F01_transcript_3021;F01_transcript_75744;F01_transcript_93313;	K09828+K05917+K01853+K07748+K08242+K01853+K00559+K07748
Ubiquinone and other terpenoid-quinone biosynthesis	ko00130	11	F01_transcript_107154;F01_transcript_116414;F01_transcript_20425;F01_transcript_21518;F01_transcript_23556;F01_transcript_28546;F01_transcript_33429;F01_transcript_34849;F01_transcript_47235;F01_transcript_68558;F01_transcript_90580;	K03809+K00487+K01904+K01904+K00487+K03809+K03809+K03809+K03809+K00487+K06126
Oxidative phosphorylation	ko00190	64	F01_transcript_102497;F01_transcript_10418;F01_transcript_104607;F01_transcript_110723;F01_transcript_111234;F01_transcript_11310;F01_transcript_114742;F01_transcript_14364;F01_transcript_14847;F01_transcript_15047;F01_transcript_20786;F01_transcript_21579;F01_transcript_24474;F01_transcript_2619;F01_transcript_27716;F01_transcript_29007;F01_transcript_30542;F01_transcript_31851;F01_transcript_31…	K03941+K01507+K02151+K01507+K02154+K00234+K01535+K02145+K02132+K02145+K02133+K02147+K02144+K01535+K03953+K02149+K00411+K00235+K01507+K02149+K01507+K01507+K01507+K03940+K02150+K02155+K02265+K02267+K03943+K01535+K03949+K03950+K11353+K03965+K11352+K02152+K03946+K02135+K02267+K03952+K03881+K02152+K02154+K03942+K02261+K00412+K01535+K01507+K00413+K02140+K02134+K02154+K02112+K03883+K03966+K03936+K02137+…
Photosynthesis	ko00195	1	F01_transcript_66467;	K02112
Arginine biosynthesis	ko00220	23	F01_transcript_111746;F01_transcript_112432;F01_transcript_115563;F01_transcript_15943;F01_transcript_17684;F01_transcript_17802;F01_transcript_20476;F01_transcript_22597;F01_transcript_25310;F01_transcript_25441;F01_transcript_25912;F01_transcript_26048;F01_transcript_26652;F01_transcript_26870;F01_transcript_27058;F01_transcript_27356;F01_transcript_31476;F01_transcript_5034;F01_transcript_5129…	K14455+K00261+K00811+K00814+K14682+K14272+K01755+K01940+K01438+K00818+K14454+K00620+K00145+K14454+K00930+K01915+K00818+K01427+K14677+K00611+K14454+K01915+K00620
Purine metabolism	ko00230	64	F01_transcript_109288;F01_transcript_114095;F01_transcript_117894;F01_transcript_118841;F01_transcript_1491;F01_transcript_16212;F01_transcript_16283;F01_transcript_16902;F01_transcript_17406;F01_transcript_17905;F01_transcript_17913;F01_transcript_1822;F01_transcript_18483;F01_transcript_18971;F01_transcript_19081;F01_transcript_20092;F01_transcript_21278;F01_transcript_21781;F01_transcript_2180…	K03787+K00759+K00365+K14641+K03010+K00764+K00873+K01835+K00873+K01835+K00873+K03002+K01835+K00873+K00873+K01756+K01835+K00873+K01951+K18151+K00873+K00873+K01939+K00948+K00942+K01923+K03787+K03787+K02327+K03787+K13484+K00856+K00939+K03011+K03013+K00940+K00940+K03015+K03505+K03017+K00940+K03008+K11808+K00962+K01835+K01933+K01427+K00759+K00939+K01490+K01952+K01952+K00873+K03006+K10807+K13811+K03027+…
Caffeine metabolism	ko00232	1	F01_transcript_117894;	K00365
Pyrimidine metabolism	ko00240	43	F01_transcript_107650;F01_transcript_109288;F01_transcript_110771;F01_transcript_118841;F01_transcript_1491;F01_transcript_1822;F01_transcript_20062;F01_transcript_23566;F01_transcript_23633;F01_transcript_25004;F01_transcript_26279;F01_transcript_27283;F01_transcript_27661;F01_transcript_27712;F01_transcript_2845;F01_transcript_29764;F01_transcript_31657;F01_transcript_31824;F01_transcript_32340…	K01955+K03787+K01937+K14641+K03010+K03002+K00876+K00384+K00876+K00876+K01956+K03787+K03787+K00609+K02327+K03787+K00857+K03011+K00761+K03013+K00940+K00940+K13800+K03015+K03505+K01520+K03017+K00940+K03008+K00962+K01464+K00943+K03006+K00207+K10807+K01240+K03027+K03012+K13998+K00254+K01465+K03016+K01081
Alanine, aspartate and glutamate metabolism	ko00250	25	F01_transcript_107650;F01_transcript_111746;F01_transcript_112432;F01_transcript_112509;F01_transcript_115563;F01_transcript_15943;F01_transcript_16212;F01_transcript_17802;F01_transcript_19620;F01_transcript_20092;F01_transcript_20476;F01_transcript_21940;F01_transcript_22597;F01_transcript_23080;F01_transcript_23780;F01_transcript_25531;F01_transcript_25912;F01_transcript_26279;F01_transcript_2…	K01955+K14455+K00261+K16871+K00811+K00814+K00764+K14272+K01953+K01756+K01755+K01580+K01940+K00827+K16871+K01939+K14454+K01956+K14454+K01915+K00609+K13566+K14454+K01915+K17761
Glycine, serine and threonine metabolism	ko00260	41	F01_transcript_101698;F01_transcript_111568;F01_transcript_111611;F01_transcript_111984;F01_transcript_112175;F01_transcript_113774;F01_transcript_115762;F01_transcript_14235;F01_transcript_17802;F01_transcript_18013;F01_transcript_19498;F01_transcript_19669;F01_transcript_20375;F01_transcript_20537;F01_transcript_23064;F01_transcript_23074;F01_transcript_23080;F01_transcript_23760;F01_transcript…	K15633+K01696+K00058+K01834+K00382+K00281+K15919+K00276+K14272+K15633+K00058+K00382+K00600+K00600+K14085+K00130+K00827+K00600+K01733+K06001+K00831+K00499+K00605+K00872+K00306+K02437+K02437+K12524+K00058+K15893+K00600+K12524+K00130+K15919+K01079+K01079+K00058+K00058+K00831+K15633+K00600
Monobactam biosynthesis	ko00261	6	F01_transcript_30971;F01_transcript_4503;F01_transcript_5151;F01_transcript_58476;F01_transcript_62161;F01_transcript_69011;	K01714+K12524+K12524+K00215+K01714+K13811
Cysteine and methionine metabolism	ko00270	47	F01_transcript_11040;F01_transcript_111746;F01_transcript_115563;F01_transcript_22315;F01_transcript_22708;F01_transcript_22861;F01_transcript_23080;F01_transcript_25428;F01_transcript_25912;F01_transcript_26512;F01_transcript_26870;F01_transcript_27186;F01_transcript_28425;F01_transcript_28651;F01_transcript_29634;F01_transcript_29859;F01_transcript_29880;F01_transcript_30296;F01_transcript_3078…	K00549+K14455+K00811+K16054+K01919+K01739+K00827+K00899+K14454+K08963+K14454+K00826+K00026+K00797+K00016+K00025+K01738+K00026+K00640+K01244+K05933+K05933+K01244+K08967+K00549+K00549+K12524+K01244+K00016+K00797+K00026+K12524+K00899+K01011+K00026+K00549+K01251+K08967+K14454+K01738+K00549+K01738+K00547+K01920+K01760+K00549+K01920
Valine, leucine and isoleucine degradation	ko00280	26	F01_transcript_112175;F01_transcript_115687;F01_transcript_12886;F01_transcript_19669;F01_transcript_22080;F01_transcript_23064;F01_transcript_23080;F01_transcript_24792;F01_transcript_24847;F01_transcript_25930;F01_transcript_25997;F01_transcript_26802;F01_transcript_26877;F01_transcript_27186;F01_transcript_27411;F01_transcript_28632;F01_transcript_42255;F01_transcript_49359;F01_transcript_5814…	K00382+K00140+K01968+K00382+K00140+K14085+K00827+K05605+K05605+K00626+K07513+K05605+K00626+K00826+K05605+K00626+K07513+K00128+K18660+K00166+K07513+K00128+K01969+K00626+K05605+K00128
Valine, leucine and isoleucine biosynthesis	ko00290	8	F01_transcript_116336;F01_transcript_15228;F01_transcript_16758;F01_transcript_17351;F01_transcript_27186;F01_transcript_28700;F01_transcript_57919;F01_transcript_96530;	K00053+K01687+K01652+K01649+K00826+K00052+K01649+K01652
Lysine biosynthesis	ko00300	9	F01_transcript_23064;F01_transcript_25183;F01_transcript_28788;F01_transcript_30971;F01_transcript_4231;F01_transcript_4503;F01_transcript_5151;F01_transcript_58476;F01_transcript_62161;	K14085+K01586+K01778+K01714+K10206+K12524+K12524+K00215+K01714
Lysine degradation	ko00310	12	F01_transcript_1457;F01_transcript_23064;F01_transcript_25930;F01_transcript_26877;F01_transcript_28632;F01_transcript_29028;F01_transcript_49359;F01_transcript_67853;F01_transcript_88688;F01_transcript_89004;F01_transcript_91404;F01_transcript_99160;	K00164+K14085+K00626+K00626+K00626+K00306+K00128+K00658+K14157+K00128+K00626+K00128
Arginine and proline metabolism	ko00330	20	F01_transcript_100797;F01_transcript_111746;F01_transcript_115563;F01_transcript_13735;F01_transcript_23064;F01_transcript_25912;F01_transcript_26870;F01_transcript_28651;F01_transcript_28728;F01_transcript_46461;F01_transcript_49359;F01_transcript_54226;F01_transcript_55774;F01_transcript_63834;F01_transcript_71413;F01_transcript_75055;F01_transcript_77989;F01_transcript_8098;F01_transcript_8900…	K10536+K14455+K00811+K00286+K14085+K14454+K14454+K00797+K00472+K00797+K00128+K12259+K12251+K00472+K00472+K14454+K00472+K12657+K00128+K00128
Histidine metabolism	ko00340	10	F01_transcript_117847;F01_transcript_20734;F01_transcript_22483;F01_transcript_23064;F01_transcript_27071;F01_transcript_49359;F01_transcript_53024;F01_transcript_64201;F01_transcript_89004;F01_transcript_99160;	K01663+K01663+K00013+K14085+K00765+K00128+K00817+K18649+K00128+K00128
Tyrosine metabolism	ko00350	22	F01_transcript_101033;F01_transcript_111746;F01_transcript_113230;F01_transcript_115563;F01_transcript_14235;F01_transcript_24779;F01_transcript_25304;F01_transcript_25912;F01_transcript_26700;F01_transcript_26870;F01_transcript_27544;F01_transcript_28855;F01_transcript_29154;F01_transcript_29656;F01_transcript_33181;F01_transcript_44293;F01_transcript_53024;F01_transcript_61961;F01_transcript_62…	K00121+K14455+K18857+K00811+K00276+K15849+K18857+K14454+K18857+K14454+K15849+K00001+K00121+K00121+K01800+K00001+K00817+K18857+K00121+K14454+K00451+K18857
Phenylalanine metabolism	ko00360	18	F01_transcript_111746;F01_transcript_115563;F01_transcript_116414;F01_transcript_14235;F01_transcript_20425;F01_transcript_21518;F01_transcript_23556;F01_transcript_24779;F01_transcript_25912;F01_transcript_26870;F01_transcript_27544;F01_transcript_33235;F01_transcript_34143;F01_transcript_53024;F01_transcript_65662;F01_transcript_68558;F01_transcript_75055;F01_transcript_75368;	K14455+K00811+K00487+K00276+K01904+K01904+K00487+K15849+K14454+K14454+K15849+K00588+K00588+K00817+K10775+K00487+K14454+K10775
Tryptophan metabolism	ko00380	12	F01_transcript_1457;F01_transcript_23064;F01_transcript_23082;F01_transcript_23130;F01_transcript_24382;F01_transcript_25930;F01_transcript_26877;F01_transcript_28632;F01_transcript_49359;F01_transcript_89004;F01_transcript_91404;F01_transcript_99160;	K00164+K14085+K03781+K03781+K03781+K00626+K00626+K00626+K00128+K00128+K00626+K00128
Phenylalanine, tyrosine and tryptophan biosynthesis	ko00400	27	F01_transcript_105997;F01_transcript_111568;F01_transcript_111746;F01_transcript_115563;F01_transcript_20139;F01_transcript_20494;F01_transcript_21559;F01_transcript_22363;F01_transcript_23349;F01_transcript_23948;F01_transcript_24455;F01_transcript_24779;F01_transcript_24839;F01_transcript_25828;F01_transcript_25912;F01_transcript_26529;F01_transcript_26870;F01_transcript_27544;F01_transcript_51…	K01658+K01696+K14455+K00811+K13832+K00800+K13832+K01626+K01736+K13832+K01626+K15849+K06001+K01609+K14454+K05359+K14454+K15849+K00800+K00817+K15227+K01850+K01626+K14454+K01850+K01657+K01735
beta-Alanine metabolism	ko00410	19	F01_transcript_115687;F01_transcript_14235;F01_transcript_21940;F01_transcript_22080;F01_transcript_23064;F01_transcript_24792;F01_transcript_24847;F01_transcript_26802;F01_transcript_27411;F01_transcript_28651;F01_transcript_46461;F01_transcript_47215;F01_transcript_49359;F01_transcript_50219;F01_transcript_54226;F01_transcript_63496;F01_transcript_89004;F01_transcript_97241;F01_transcript_99160;	K00140+K00276+K01580+K00140+K14085+K05605+K05605+K05605+K05605+K00797+K00797+K01578+K00128+K01464+K12259+K00207+K00128+K05605+K00128
Taurine and hypotaurine metabolism	ko00430	4	F01_transcript_21940;F01_transcript_28605;F01_transcript_29005;F01_transcript_86996;	K01580+K10712+K10712+K10712
Selenocompound metabolism	ko00450	14	F01_transcript_11040;F01_transcript_22861;F01_transcript_23566;F01_transcript_2684;F01_transcript_2875;F01_transcript_41319;F01_transcript_44403;F01_transcript_46172;F01_transcript_62938;F01_transcript_69011;F01_transcript_80741;F01_transcript_88577;F01_transcript_9214;F01_transcript_95526;	K00549+K01739+K00384+K08247+K08247+K00549+K00549+K01874+K00549+K13811+K00549+K01760+K01874+K00549
Cyanoamino acid metabolism	ko00460	19	F01_transcript_102956;F01_transcript_105969;F01_transcript_15412;F01_transcript_16226;F01_transcript_20375;F01_transcript_20537;F01_transcript_21137;F01_transcript_23760;F01_transcript_24753;F01_transcript_25167;F01_transcript_27583;F01_transcript_27869;F01_transcript_31043;F01_transcript_47634;F01_transcript_48701;F01_transcript_54223;F01_transcript_67996;F01_transcript_79115;F01_transcript_8642…	K05349+K05350+K05349+K05349+K00600+K00600+K05350+K00600+K05350+K01188+K13035+K01455+K01188+K00600+K05349+K13035+K01455+K01455+K00600
Glutathione metabolism	ko00480	34	F01_transcript_100813;F01_transcript_101607;F01_transcript_19469;F01_transcript_19972;F01_transcript_21554;F01_transcript_22571;F01_transcript_22708;F01_transcript_23582;F01_transcript_28048;F01_transcript_28651;F01_transcript_31740;F01_transcript_31791;F01_transcript_31949;F01_transcript_32380;F01_transcript_32581;F01_transcript_32844;F01_transcript_33023;F01_transcript_33469;F01_transcript_3351…	K00799+K00799+K00383+K00036+K00036+K01255+K01919+K00031+K00434+K00797+K00434+K00434+K00432+K00799+K00434+K00799+K00434+K00432+K00799+K00799+K00799+K00799+K00799+K00799+K00432+K00797+K01256+K10807+K00799+K00799+K00434+K00383+K01920+K01920
Starch and sucrose metabolism	ko00500	65	F01_transcript_100957;F01_transcript_102956;F01_transcript_105969;F01_transcript_111112;F01_transcript_112698;F01_transcript_112869;F01_transcript_11317;F01_transcript_118661;F01_transcript_11928;F01_transcript_14798;F01_transcript_15313;F01_transcript_15412;F01_transcript_16226;F01_transcript_16902;F01_transcript_17905;F01_transcript_1845;F01_transcript_18483;F01_transcript_18667;F01_transcript_…	K00963+K05349+K05350+K00844+K13648+K01193+K00963+K16055+K00975+K01810+K01810+K05349+K05349+K01835+K01835+K00696+K01835+K01810+K00975+K19892+K00963+K05350+K01835+K01051+K01051+K00012+K00696+K00975+K00847+K05350+K08678+K01188+K08678+K16055+K16055+K08678+K01051+K00847+K01188+K16055+K00695+K00695+K19893+K00703+K00700+K01835+K15920+K05349+K00695+K00695+K00844+K01051+K00688+K01194+K00695+K08678+K00705+…
N-Glycan biosynthesis	ko00510	23	F01_transcript_10755;F01_transcript_108646;F01_transcript_114238;F01_transcript_12086;F01_transcript_12307;F01_transcript_18388;F01_transcript_18495;F01_transcript_19819;F01_transcript_20292;F01_transcript_22876;F01_transcript_25126;F01_transcript_25267;F01_transcript_26433;F01_transcript_28685;F01_transcript_30078;F01_transcript_30441;F01_transcript_32822;F01_transcript_36401;F01_transcript_4488…	K07151+K12669+K03843+K12667+K01230+K12666+K12666+K03846+K00726+K03847+K12666+K03849+K12670+K00729+K12669+K07252+K00721+K12668+K05546+K01228+K00736+K07151+K01231
Other glycan degradation	ko00511	13	F01_transcript_10645;F01_transcript_116187;F01_transcript_20945;F01_transcript_2167;F01_transcript_23365;F01_transcript_29547;F01_transcript_3139;F01_transcript_3247;F01_transcript_50597;F01_transcript_6028;F01_transcript_6977;F01_transcript_77323;F01_transcript_8995;	K12309+K01191+K12373+K01190+K01206+K01444+K01191+K01191+K01206+K17108+K15923+K12373+K15923
Other types of O-glycan biosynthesis	ko00514	1	F01_transcript_60495;	K03691
Amino sugar and nucleotide sugar metabolism	ko00520	69	F01_transcript_100957;F01_transcript_102084;F01_transcript_111112;F01_transcript_111798;F01_transcript_112378;F01_transcript_112698;F01_transcript_11317;F01_transcript_11928;F01_transcript_11972;F01_transcript_14007;F01_transcript_14798;F01_transcript_15313;F01_transcript_16849;F01_transcript_16902;F01_transcript_17069;F01_transcript_17352;F01_transcript_17905;F01_transcript_18483;F01_transcript_…	K00963+K06118+K00844+K01784+K00326+K13648+K00963+K00975+K12450+K01209+K01810+K01810+K01209+K01835+K12447+K12450+K01835+K01835+K00966+K01810+K00975+K00972+K00972+K00963+K12373+K01835+K00012+K01836+K00975+K12449+K13379+K00847+K01711+K08678+K00966+K10046+K08678+K18677+K12449+K13379+K16190+K02377+K08678+K00326+K00326+K00326+K00847+K20547+K17497+K00965+K05305+K12446+K01835+K15920+K12451+K10046+K00844+…
Glycosaminoglycan degradation	ko00531	4	F01_transcript_10645;F01_transcript_20945;F01_transcript_24021;F01_transcript_77323;	K12309+K12373+K07964+K12373
Glycerolipid metabolism	ko00561	20	F01_transcript_102084;F01_transcript_105148;F01_transcript_109697;F01_transcript_14919;F01_transcript_20296;F01_transcript_23064;F01_transcript_24216;F01_transcript_25574;F01_transcript_26634;F01_transcript_26860;F01_transcript_28059;F01_transcript_29766;F01_transcript_48273;F01_transcript_49359;F01_transcript_59220;F01_transcript_79473;F01_transcript_81048;F01_transcript_88567;F01_transcript_890…	K06118+K09480+K00864+K07407+K00901+K14085+K13506+K13519+K01054+K13523+K07407+K13506+K00901+K00128+K06119+K00901+K13513+K00679+K00128+K00128
Inositol phosphate metabolism	ko00562	22	F01_transcript_115687;F01_transcript_12249;F01_transcript_16010;F01_transcript_22080;F01_transcript_22707;F01_transcript_28914;F01_transcript_29642;F01_transcript_31285;F01_transcript_32317;F01_transcript_32677;F01_transcript_32816;F01_transcript_41257;F01_transcript_45818;F01_transcript_50672;F01_transcript_51;F01_transcript_57843;F01_transcript_59691;F01_transcript_64201;F01_transcript_75740;F0…	K00140+K05857+K05857+K00140+K01114+K15422+K01092+K01803+K10047+K10047+K01803+K00915+K00913+K03103+K00888+K01110+K03103+K18649+K01803+K01110+K01114+K05857
Glycosylphosphatidylinositol(GPI)-anchor biosynthesis	ko00563	6	F01_transcript_115129;F01_transcript_16105;F01_transcript_20782;F01_transcript_24895;F01_transcript_30804;F01_transcript_91696;	K05292+K05291+K05293+K05290+K07541+K05289
Glycerophospholipid metabolism	ko00564	20	F01_transcript_100197;F01_transcript_19124;F01_transcript_20296;F01_transcript_22707;F01_transcript_24216;F01_transcript_24656;F01_transcript_25574;F01_transcript_26730;F01_transcript_26754;F01_transcript_26860;F01_transcript_29766;F01_transcript_30458;F01_transcript_31055;F01_transcript_48273;F01_transcript_5861;F01_transcript_61921;F01_transcript_79473;F01_transcript_81048;F01_transcript_87247;…	K05929+K00111+K00901+K01114+K13506+K00967+K13519+K01126+K14156+K13523+K13506+K00968+K06130+K00901+K01115+K01613+K00901+K13513+K13510+K01114
Ether lipid metabolism	ko00565	5	F01_transcript_22707;F01_transcript_25574;F01_transcript_5861;F01_transcript_87247;F01_transcript_88410;	K01114+K13519+K01115+K13510+K01114
Arachidonic acid metabolism	ko00590	4	F01_transcript_19195;F01_transcript_31949;F01_transcript_33469;F01_transcript_36507;	K01254+K00432+K00432+K00432
Linoleic acid metabolism	ko00591	8	F01_transcript_42380;F01_transcript_4807;F01_transcript_48899;F01_transcript_6365;F01_transcript_6588;F01_transcript_7155;F01_transcript_7381;F01_transcript_8631;	K00454+K15718+K15718+K15718+K15718+K00454+K00454+K15718
alpha-Linolenic acid metabolism	ko00592	24	F01_transcript_10182;F01_transcript_11257;F01_transcript_113230;F01_transcript_11387;F01_transcript_12134;F01_transcript_15259;F01_transcript_15275;F01_transcript_20496;F01_transcript_25304;F01_transcript_25997;F01_transcript_26700;F01_transcript_28447;F01_transcript_32420;F01_transcript_32840;F01_transcript_42255;F01_transcript_42380;F01_transcript_61961;F01_transcript_70073;F01_transcript_7155;…	K10527+K10527+K18857+K10527+K00232+K00232+K10527+K10526+K18857+K07513+K18857+K00232+K10525+K10525+K07513+K00454+K18857+K05894+K00454+K00454+K10525+K07513+K18857+K10527
Sphingolipid metabolism	ko00600	13	F01_transcript_10645;F01_transcript_106823;F01_transcript_108600;F01_transcript_14919;F01_transcript_16695;F01_transcript_19581;F01_transcript_2167;F01_transcript_28059;F01_transcript_41633;F01_transcript_6028;F01_transcript_66322;F01_transcript_88541;F01_transcript_91898;	K12309+K12349+K04715+K07407+K12349+K00654+K01190+K07407+K12349+K17108+K01634+K04708+K00654
Glycosphingolipid biosynthesis - globo series	ko00603		F01_transcript_14919;F01_transcript_20945;F01_transcript_28059;F01_transcript_77323	K07407+K12373+K07407+K12373
Glycosphingolipid biosynthesis - ganglio series	ko00604	3	F01_transcript_10645F01_transcript_20945F01_transcript_77323	K12309+K12373+K12373
Pyruvate metabolism	ko00620	59	F01_transcript_108262;F01_transcript_111336;F01_transcript_112175;F01_transcript_114304;F01_transcript_117782;F01_transcript_13380;F01_transcript_14638;F01_transcript_16283;F01_transcript_16392;F01_transcript_17351;F01_transcript_17406;F01_transcript_17913;F01_transcript_18014;F01_transcript_18497;F01_transcript_18971;F01_transcript_19081;F01_transcript_19669;F01_transcript_20018;F01_transcript_2…	K01759+K01679+K00382+K02160+K00627+K01610+K00627+K00873+K00028+K01649+K00873+K00873+K00029+K00102+K00873+K00873+K00382+K00029+K01961+K01679+K00873+K00873+K00873+K14085+K00162+K00626+K11262+K00162+K00626+K00161+K00026+K00626+K00016+K00025+K00026+K01759+K01069+K01595+K01759+K01069+K01595+K11262+K01895+K00016+K00026+K00128+K00627+K01649+K00026+K00873+K00028+K01512+K01962+K01595+K00161+K00128+K00161+…
Glyoxylate and dicarboxylate metabolism	ko00630	43	F01_transcript_108280;F01_transcript_112175;F01_transcript_113774;F01_transcript_115762;F01_transcript_176;F01_transcript_17802;F01_transcript_19669;F01_transcript_20375;F01_transcript_20537;F01_transcript_21275;F01_transcript_23082;F01_transcript_23130;F01_transcript_23760;F01_transcript_24052;F01_transcript_24382;F01_transcript_25930;F01_transcript_26877;F01_transcript_27356;F01_transcript_2786…	K00122+K00382+K00281+K15919+K00284+K14272+K00382+K00600+K00600+K01647+K03781+K03781+K00600+K01647+K03781+K00626+K00626+K01915+K01455+K00122+K00605+K00026+K00626+K00025+K00026+K18121+K01681+K01681+K02437+K02437+K15893+K00600+K00026+K01681+K01601+K15919+K00026+K01455+K01915+K01455+K00600+K00626+K01602
Propanoate metabolism	ko00640	26	F01_transcript_112175;F01_transcript_114304;F01_transcript_115687;F01_transcript_19669;F01_transcript_20122;F01_transcript_21354;F01_transcript_22080;F01_transcript_24792;F01_transcript_24847;F01_transcript_25930;F01_transcript_26;F01_transcript_26802;F01_transcript_26877;F01_transcript_27411;F01_transcript_28632;F01_transcript_29634;F01_transcript_30398;F01_transcript_42194;F01_transcript_4273;F…	K00382+K02160+K00140+K00382+K01961+K01900+K00140+K05605+K05605+K00626+K11262+K05605+K00626+K05605+K00626+K00016+K01899+K11262+K01895+K00016+K01578+K01899+K00166+K01962+K00626+K05605
Butanoate metabolism	ko00650	11	F01_transcript_112509;F01_transcript_16758;F01_transcript_21940;F01_transcript_23780;F01_transcript_25930;F01_transcript_26877;F01_transcript_28632;F01_transcript_30374;F01_transcript_91404;F01_transcript_96530;F01_transcript_99159;	K16871+K01652+K01580+K16871+K00626+K00626+K00626+K18121+K00626+K01652+K17761
C5-Branched dibasic acid metabolism	ko00660	3	F01_transcript_16758;F01_transcript_28700;F01_transcript_96530;	K01652+K00052+K01652
One carbon pool by folate	ko00670	13	F01_transcript_15908;F01_transcript_16893;F01_transcript_17437;F01_transcript_20375;F01_transcript_20537;F01_transcript_23760;F01_transcript_28009;F01_transcript_31418;F01_transcript_47634;F01_transcript_75724;F01_transcript_80308;F01_transcript_86424;F01_transcript_97822;	K01938+K00297+K00297+K00600+K00600+K00600+K00605+K01934+K00600+K00601+K13998+K00600+K00604
Carbon fixation in photosynthetic organisms	ko00710	37	F01_transcript_100503;F01_transcript_107020;F01_transcript_111746;F01_transcript_115064;F01_transcript_116717;F01_transcript_117719;F01_transcript_13380;F01_transcript_13404;F01_transcript_15943;F01_transcript_16392;F01_transcript_17800;F01_transcript_17802;F01_transcript_18014;F01_transcript_20018;F01_transcript_20869;F01_transcript_25293;F01_transcript_25912;F01_transcript_26870;F01_transcript_…	K00134+K03841+K14455+K00134+K00134+K01623+K01610+K01623+K00814+K00028+K00927+K14272+K00029+K00029+K00134+K01623+K14454+K14454+K00026+K01623+K00025+K00026+K01803+K01807+K01595+K01803+K01783+K01595+K00026+K01601+K00026+K00028+K14454+K01803+K01595+K00134+K01602
Thiamine metabolism	ko00730	3	F01_transcript_24534;F01_transcript_28725;F01_transcript_62149;	K04487+K03146+K14153
Riboflavin metabolism	ko00740	4	F01_transcript_28880;F01_transcript_45961;F01_transcript_75063;F01_transcript_78272;	K20884+K11752+K11752+K00793
Vitamin B6 metabolism	ko00750	8	F01_transcript_23073;F01_transcript_24537;F01_transcript_25205;F01_transcript_28513;F01_transcript_31746;F01_transcript_32032;F01_transcript_49274;F01_transcript_71349;	K00275+K01733+K00831+K06215+K06215+K08681+K00868+K00831
Nicotinate and nicotinamide metabolism	ko00760	10	F01_transcript_105173;F01_transcript_109288;F01_transcript_113040;F01_transcript_27283;F01_transcript_27661;F01_transcript_29764;F01_transcript_71404;F01_transcript_79850;F01_transcript_88413;F01_transcript_99380;	K03426+K03787+K00763+K03787+K03787+K03787+K01240+K00767+K00767+K01081
Pantothenate and CoA biosynthesis	ko00770	10	F01_transcript_116336;F01_transcript_15228;F01_transcript_16758;F01_transcript_26140;F01_transcript_27186;F01_transcript_32306;F01_transcript_50219;F01_transcript_5633;F01_transcript_63496;F01_transcript_96530;	K00053+K01687+K01652+K09680+K00826+K00859+K01464+K09680+K00207+K01652
Biotin metabolism	ko00780	11	F01_transcript_104539;F01_transcript_12253;F01_transcript_25239;F01_transcript_28276;F01_transcript_33231;F01_transcript_33487;F01_transcript_33860;F01_transcript_41324;F01_transcript_67875;F01_transcript_79414;F01_transcript_83159;	K00208+K09458+K00208+K00059+K00059+K00059+K00059+K00059+K02372+K00059+K09458
Folate biosynthesis	ko00790	5	F01_transcript_104605;F01_transcript_30370;F01_transcript_71389;F01_transcript_80308;F01_transcript_90258;	K13941+K18482+K18482+K13998+K01633
Porphyrin and chlorophyll metabolism	ko00860	10	F01_transcript_103105;F01_transcript_103758;F01_transcript_13218;F01_transcript_21065;F01_transcript_28508;F01_transcript_36468;F01_transcript_51018;F01_transcript_64788;F01_transcript_81532;F01_transcript_93956;	K04040+K00228+K01885+K01885+K03405+K19054+K01749+K13545+K00231+K10960
Terpenoid backbone biosynthesis	ko00900	23	F01_transcript_103470;F01_transcript_115498;F01_transcript_14140;F01_transcript_20638;F01_transcript_21009;F01_transcript_23587;F01_transcript_23905;F01_transcript_24808;F01_transcript_25930;F01_transcript_26877;F01_transcript_26956;F01_transcript_27373;F01_transcript_27534;F01_transcript_28632;F01_transcript_30445;F01_transcript_32089;F01_transcript_34244;F01_transcript_38989;F01_transcript_6558…	K01597+K03526+K06013+K05906+K05906+K13789+K00938+K03527+K00626+K00626+K05954+K14066+K00869+K00626+K05955+K01823+K01823+K00787+K00099+K05955+K00787+K00626+K10960
Monoterpenoid biosynthesis	ko00902	1	F01_transcript_31616;	K15095
Limonene and pinene degradation	ko00903	2	F01_transcript_89004;F01_transcript_99160;	K00128+K00128
Carotenoid biosynthesis	ko00906	1	F01_transcript_112092;	K09841
Nitrogen metabolism	ko00910	11	F01_transcript_112432;F01_transcript_176;F01_transcript_27356;F01_transcript_27869;F01_transcript_33001;F01_transcript_33687;F01_transcript_34320;F01_transcript_35694;F01_transcript_67996;F01_transcript_77198;F01_transcript_79115;	K00261+K00284+K01915+K01455+K01674+K01674+K01673+K01725+K01455+K01915+K01455
Sulfur metabolism	ko00920	12	F01_transcript_115194;F01_transcript_22861;F01_transcript_25932;F01_transcript_28914;F01_transcript_29572;F01_transcript_29880;F01_transcript_30786;F01_transcript_37425;F01_transcript_53273;F01_transcript_69011;F01_transcript_75855;F01_transcript_83726;	K17725+K01739+K01082+K15422+K00387+K01738+K00640+K08738+K01011+K13811+K01738+K01738
Phenylpropanoid biosynthesis	ko00940	40	F01_transcript_102956;F01_transcript_105969;F01_transcript_106463;F01_transcript_111879;F01_transcript_116414;F01_transcript_118669;F01_transcript_15412;F01_transcript_16226;F01_transcript_20425;F01_transcript_20689;F01_transcript_21137;F01_transcript_21518;F01_transcript_23556;F01_transcript_23816;F01_transcript_24753;F01_transcript_25167;F01_transcript_25546;F01_transcript_28163;F01_transcript_…	K05349+K05350+K00430+K13066+K00487+K00083+K05349+K05349+K01904+K09755+K05350+K01904+K00487+K09754+K05350+K01188+K13065+K09753+K00083+K00430+K00430+K00430+K00430+K00430+K00430+K13066+K00430+K01188+K00430+K18368+K00430+K00588+K00588+K05349+K09755+K00430+K10775+K00487+K00083+K10775
Flavonoid biosynthesis	ko00941	21	F01_transcript_108383;F01_transcript_113848;F01_transcript_116414;F01_transcript_21076;F01_transcript_22929;F01_transcript_23556;F01_transcript_23816;F01_transcript_25101;F01_transcript_25546;F01_transcript_29706;F01_transcript_29851;F01_transcript_30082;F01_transcript_30291;F01_transcript_30429;F01_transcript_33052;F01_transcript_33235;F01_transcript_34143;F01_transcript_46723;F01_transcript_652…	K13082+K00660+K00487+K05280+K13083+K00487+K09754+K05280+K13065+K13081+K00475+K21102+K21102+K05277+K01859+K00588+K00588+K05277+K01859+K00487+K00660
Flavone and flavonol biosynthesis	ko00944	4	F01_transcript_21076;F01_transcript_22929;F01_transcript_25101;F01_transcript_34535;	K05280+K13083+K05280+K13272
Stilbenoid, diarylheptanoid and gingerol biosynthesis	ko00945	7	F01_transcript_116414;F01_transcript_23556;F01_transcript_23816;F01_transcript_25546;F01_transcript_33235;F01_transcript_34143;F01_transcript_68558;	K00487+K00487+K09754+K13065+K00588+K00588+K00487
Isoquinoline alkaloid biosynthesis	ko00950	8	F01_transcript_111746;F01_transcript_115563;F01_transcript_14235;F01_transcript_24779;F01_transcript_25912;F01_transcript_26870;F01_transcript_27544;F01_transcript_75055;	K14455+K00811+K00276+K15849+K14454+K14454+K15849+K14454
Tropane, piperidine and pyridine alkaloid biosynthesis	ko00960	9	F01_transcript_111746;F01_transcript_115563;F01_transcript_14235;F01_transcript_24779;F01_transcript_25912;F01_transcript_26870;F01_transcript_27544;F01_transcript_53024;F01_transcript_75055;	K14455+K00811+K00276+K15849+K14454+K14454+K15849+K00817+K14454
Aminoacyl-tRNA biosynthesis	ko00970	47	F01_transcript_100903;F01_transcript_103101;F01_transcript_104478;F01_transcript_111509;F01_transcript_13218;F01_transcript_14478;F01_transcript_15684;F01_transcript_16256;F01_transcript_17091;F01_transcript_17428;F01_transcript_18289;F01_transcript_18881;F01_transcript_1965;F01_transcript_19703;F01_transcript_20870;F01_transcript_20997;F01_transcript_21065;F01_transcript_21237;F01_transcript_212…	K01889+K01875+K01875+K01873+K01885+K01880+K04567+K02434+K01890+K01887+K01893+K01876+K01870+K02433+K01893+K01881+K01885+K01881+K01881+K01883+K01870+K01869+K01892+K01875+K01875+K01869+K01889+K01867+K01866+K01873+K01872+K01866+K01870+K01874+K14164+K01892+K01892+K01893+K01868+K01890+K01886+K01883+K01873+K01889+K01874+K01876+K00604
Biosynthesis of unsaturated fatty acids	ko01040	19	F01_transcript_108812;F01_transcript_12134;F01_transcript_15259;F01_transcript_25610;F01_transcript_25997;F01_transcript_26389;F01_transcript_28176;F01_transcript_28276;F01_transcript_28447;F01_transcript_33231;F01_transcript_33487;F01_transcript_33860;F01_transcript_41324;F01_transcript_42255;F01_transcript_64339;F01_transcript_66161;F01_transcript_79414;F01_transcript_82955;F01_transcript_88810;	K10258+K00232+K00232+K03921+K07513+K10251+K10251+K00059+K00232+K00059+K00059+K00059+K00059+K07513+K01068+K03921+K00059+K01068+K07513
Carbon metabolism	ko01200	162	F01_transcript_100503;F01_transcript_101033;F01_transcript_101698;F01_transcript_107020;F01_transcript_108280;F01_transcript_110491;F01_transcript_111112;F01_transcript_111336;F01_transcript_111611;F01_transcript_111746;F01_transcript_111984;F01_transcript_112175;F01_transcript_112432;F01_transcript_112578;F01_transcript_11310;F01_transcript_113774;F01_transcript_114304;F01_transcript_115064;F01_…	K00134+K00121+K15633+K03841+K00122+K01689+K00844+K01679+K00058+K14455+K01834+K00382+K00261+K01689+K00234+K00281+K02160+K00134+K00140+K15919+K00134+K01623+K00627+K00616+K01610+K01623+K00164+K00627+K01810+K01810+K01938+K00814+K00873+K00028+K00297+K00850+K00873+K00297+K00927+K14272+K00873+K15633+K00029+K01810+K00873+K00873+K00058+K00382+K00036+K00029+K01961+K00600+K00850+K00600+K01679+K00134+K00850+…
2-Oxocarboxylic acid metabolism	ko01210	33	F01_transcript_111746;F01_transcript_115563;F01_transcript_116336;F01_transcript_15228;F01_transcript_15943;F01_transcript_16758;F01_transcript_17351;F01_transcript_17684;F01_transcript_17802;F01_transcript_21275;F01_transcript_23582;F01_transcript_24052;F01_transcript_25310;F01_transcript_25441;F01_transcript_25912;F01_transcript_26048;F01_transcript_26652;F01_transcript_26870;F01_transcript_270…	K14455+K00811+K00053+K01687+K00814+K01652+K01649+K14682+K14272+K01647+K00031+K01647+K01438+K00818+K14454+K00620+K00145+K14454+K00930+K00826+K00030+K00052+K01681+K00818+K01681+K14677+K01681+K01649+K00030+K14454+K00620+K00030+K01652
Fatty acid metabolism	ko01212	48	F01_transcript_10182;F01_transcript_104539;F01_transcript_108812;F01_transcript_110995;F01_transcript_11156;F01_transcript_11257;F01_transcript_11387;F01_transcript_114304;F01_transcript_11858;F01_transcript_12134;F01_transcript_12253;F01_transcript_12945;F01_transcript_12964;F01_transcript_15229;F01_transcript_15259;F01_transcript_15275;F01_transcript_20122;F01_transcript_25239;F01_transcript_25…	K10527+K00208+K10258+K00648+K01897+K10527+K10527+K02160+K01897+K00232+K09458+K01897+K01897+K01897+K00232+K10527+K01961+K00208+K03921+K00626+K07513+K11262+K10251+K00645+K00626+K10251+K00059+K00232+K00626+K01074+K00059+K00059+K00059+K00059+K01074+K11262+K07513+K01897+K01897+K03921+K02372+K01962+K00059+K01897+K09458+K07513+K00626+K10527
Biosynthesis of amino acids	ko01230	146	F01_transcript_100503;F01_transcript_101698;F01_transcript_105997;F01_transcript_11040;F01_transcript_110491;F01_transcript_111568;F01_transcript_111611;F01_transcript_111746;F01_transcript_111984;F01_transcript_112578;F01_transcript_115064;F01_transcript_115563;F01_transcript_116336;F01_transcript_116717;F01_transcript_117719;F01_transcript_117847;F01_transcript_118551;F01_transcript_13404;F01_t…	K00134+K15633+K01658+K00549+K01689+K01696+K00058+K14455+K01834+K01689+K00134+K00811+K00053+K00134+K01623+K01663+K00616+K01623+K00286+K01687+K00814+K00873+K01652+K00850+K01649+K00873+K14682+K00927+K14272+K00873+K15633+K00873+K00873+K00058+K13832+K00600+K00850+K01755+K00800+K00600+K01663+K00134+K00850+K01647+K00850+K13832+K00873+K01626+K00013+K01940+K00873+K00873+K01689+K01739+K00850+K14085+K01736+…
ABC transporters	ko02010	3	F01_transcript_67118;F01_transcript_746;F01_transcript_94592;	K05658+K05658+K05658
Ribosome biogenesis in eukaryotes	ko03008	20	F01_transcript_101917;F01_transcript_105022;F01_transcript_106989;F01_transcript_117212;F01_transcript_1489;F01_transcript_19290;F01_transcript_24720;F01_transcript_27506;F01_transcript_3232;F01_transcript_32564;F01_transcript_38280;F01_transcript_4277;F01_transcript_4443;F01_transcript_47610;F01_transcript_49;F01_transcript_5329;F01_transcript_6784;F01_transcript_71262;F01_transcript_75992;F01_t…	K14574+K03264+K13288+K14561+K14290+K14538+K03097+K03097+K14544+K07936+K11130+K14536+K14521+K14565+K14550+K14558+K14555+K07562+K14563+K12845
Ribosome	ko03010	124	F01_transcript_100652;F01_transcript_102238;F01_transcript_103005;F01_transcript_103082;F01_transcript_105154;F01_transcript_107653;F01_transcript_109320;F01_transcript_113654;F01_transcript_115436;F01_transcript_28114;F01_transcript_28436;F01_transcript_28666;F01_transcript_28705;F01_transcript_29475;F01_transcript_31148;F01_transcript_31210;F01_transcript_31734;F01_transcript_31970;F01_transcri…	K02866+K02955+K02981+K02957+K02870+K02873+K02978+K02979+K02955+K02930+K02925+K02930+K02925+K02863+K02998+K02932+K02998+K02897+K02932+K02937+K02987+K02984+K02938+K02877+K02985+K02987+K02934+K02987+K02936+K02937+K02939+K02865+K02938+K02936+K02993+K02947+K02995+K02937+K02995+K02865+K02872+K02885+K02868+K02880+K02883+K02883+K02953+K02951+K02966+K02889+K02882+K02880+K02964+K02922+K02870+K02917+K02964+…
RNA transport	ko03013	86	F01_transcript_1015;F01_transcript_102;F01_transcript_103503;F01_transcript_1058;F01_transcript_10614;F01_transcript_106954;F01_transcript_107356;F01_transcript_109;F01_transcript_1110;F01_transcript_1124;F01_transcript_114190;F01_transcript_118633;F01_transcript_12626;F01_transcript_1489;F01_transcript_15504;F01_transcript_17513;F01_transcript_1768;F01_transcript_18509;F01_transcript_18777;F01_t…	K05749+K14310+K13025+K14289+K03253+K03242+K02516+K03260+K14300+K14327+K12881+K14308+K14304+K14290+K03240+K03260+K03243+K12878+K14319+K14307+K14319+K12812+K03231+K14293+K03242+K03257+K03231+K12812+K14305+K03250+K03246+K14298+K03237+K14298+K14295+K03247+K14313+K14004+K03245+K14004+K03248+K03249+K07936+K03259+K03259+K03254+K03113+K12160+K03113+K12877+K12881+K14297+K12160+K14293+K03260+K14312+K13137+…
mRNA surveillance pathway	ko03015	46	F01_transcript_10150;F01_transcript_102322;F01_transcript_103503;F01_transcript_10363;F01_transcript_106482;F01_transcript_106903;F01_transcript_10913;F01_transcript_1124;F01_transcript_11343;F01_transcript_114190;F01_transcript_12622;F01_transcript_13838;F01_transcript_16359;F01_transcript_19012;F01_transcript_20541;F01_transcript_20715;F01_transcript_20959;F01_transcript_21469;F01_transcript_21…	K11583+K14416+K13025+K04354+K14399+K14376+K14402+K14327+K04354+K12881+K11584+K14403+K03456+K03267+K04382+K06269+K11583+K14411+K12812+K03265+K06269+K12812+K06269+K06269+K06269+K04382+K04382+K14962+K14397+K12877+K12881+K14401+K14326+K14411+K14403+K11583+K11584+K03267+K14400+K12882+K13126+K03456+K04382+K12883+K12875+K13126
RNA degradation	ko03018	41	F01_transcript_106798;F01_transcript_110491;F01_transcript_112578;F01_transcript_117721;F01_transcript_12317;F01_transcript_17221;F01_transcript_17451;F01_transcript_1904;F01_transcript_20395;F01_transcript_21079;F01_transcript_21346;F01_transcript_22851;F01_transcript_23023;F01_transcript_26737;F01_transcript_30264;F01_transcript_30887;F01_transcript_31209;F01_transcript_31399;F01_transcript_339…	K12598+K01689+K01689+K07573+K12603+K00850+K04077+K12600+K00850+K00850+K00850+K01689+K00850+K12611+K03679+K12606+K03681+K12620+K12587+K12585+K12626+K00962+K01689+K12589+K14442+K12607+K12616+K00850+K12616+K13126+K12604+K12616+K01689+K12611+K12617+K12624+K12616+K12602+K12616+K12599+K13126
RNA polymerase	ko03020	11	F01_transcript_1491;F01_transcript_1822;F01_transcript_31824;F01_transcript_32944;F01_transcript_34398;F01_transcript_36595;F01_transcript_36824;F01_transcript_62027;F01_transcript_72939;F01_transcript_77301;F01_transcript_93528;	K03010+K03002+K03011+K03013+K03015+K03017+K03008+K03006+K03027+K03012+K03016
Basal transcription factors	ko03022	8	F01_transcript_10779;F01_transcript_16781;F01_transcript_18561;F01_transcript_23390;F01_transcript_29366;F01_transcript_64962;F01_transcript_8340;F01_transcript_94524;	K03130+K03126+K02202+K03142+K03143+K03122+K10843+K03124
DNA replication	ko03030	16	F01_transcript_108186;F01_transcript_114076;F01_transcript_2773;F01_transcript_28332;F01_transcript_2845;F01_transcript_28671;F01_transcript_29006;F01_transcript_33081;F01_transcript_36071;F01_transcript_55165;F01_transcript_70833;F01_transcript_7730;F01_transcript_81949;F01_transcript_91849;F01_transcript_94919;F01_transcript_96035;	K02541+K07466+K10754+K10756+K02327+K04799+K10756+K10739+K03505+K10755+K04802+K10747+K02209+K10739+K07466+K03111
Spliceosome	ko03040	82	F01_transcript_1013;F01_transcript_103503;F01_transcript_104740;F01_transcript_104747;F01_transcript_106901;F01_transcript_107377;F01_transcript_109566;F01_transcript_112177;F01_transcript_112719;F01_transcript_114190;F01_transcript_115861;F01_transcript_116801;F01_transcript_117182;F01_transcript_1235;F01_transcript_12764;F01_transcript_14568;F01_transcript_1527;F01_transcript_15590;F01_transcri…	K12830+K13025+K12815+K12896+K12741+K12828+K12741+K11087+K12857+K12881+K12891+K12852+K12820+K12823+K03283+K03283+K12818+K03283+K03283+K12847+K12878+K12816+K12662+K12837+K10599+K12862+K12856+K12741+K12823+K12896+K11093+K12812+K12741+K12827+K12741+K12741+K12812+K12831+K12741+K12741+K12893+K12821+K12836+K12893+K12885+K12890+K12741+K11094+K12873+K11088+K12842+K09564+K12877+K09567+K12881+K11096+K12833+…
Proteasome	ko03050	38	F01_transcript_103626;F01_transcript_106523;F01_transcript_106661;F01_transcript_115345;F01_transcript_116083;F01_transcript_118086;F01_transcript_21285;F01_transcript_2141;F01_transcript_23601;F01_transcript_23791;F01_transcript_25802;F01_transcript_26094;F01_transcript_26619;F01_transcript_27306;F01_transcript_27589;F01_transcript_28607;F01_transcript_28804;F01_transcript_30391;F01_transcript_3…	K03062+K03036+K03030+K03028+K03039+K02735+K03033+K03032+K03065+K03035+K03066+K03061+K03039+K03061+K03029+K03064+K03038+K03037+K03038+K06700+K02739+K02727+K02731+K03031+K02726+K02732+K02737+K02729+K02736+K02734+K03035+K02730+K03028+K06699+K02728+K06700+K03063+K02739
Protein export	ko03060	14	F01_transcript_15432;F01_transcript_16995;F01_transcript_17010;F01_transcript_21646;F01_transcript_29701;F01_transcript_34374;F01_transcript_35958;F01_transcript_37682;F01_transcript_40763;F01_transcript_43155;F01_transcript_58703;F01_transcript_76803;F01_transcript_85856;F01_transcript_95634;	K09490+K09490+K03107+K03106+K12275+K13280+K12948+K03109+K12272+K12947+K12946+K13431+K10956+K03108
Base excision repair	ko03410	8	F01_transcript_25587;F01_transcript_26397;F01_transcript_2845;F01_transcript_28671;F01_transcript_3034;F01_transcript_36071;F01_transcript_70833;F01_transcript_7730;	K03648+K10803+K02327+K04799+K10798+K03505+K04802+K10747
Nucleotide excision repair	ko03420	20	F01_transcript_109335;F01_transcript_114076;F01_transcript_18561;F01_transcript_23390;F01_transcript_24509;F01_transcript_2773;F01_transcript_2833;F01_transcript_28332;F01_transcript_2845;F01_transcript_29006;F01_transcript_29366;F01_transcript_33081;F01_transcript_36071;F01_transcript_55165;F01_transcript_70833;F01_transcript_7730;F01_transcript_8340;F01_transcript_91849;F01_transcript_94919;F01…	K10839+K07466+K02202+K03142+K10839+K10754+K10610+K10756+K02327+K10756+K03143+K10739+K03505+K10755+K04802+K10747+K10843+K10739+K07466+K10609
Mismatch repair	ko03430	13	F01_transcript_114076;F01_transcript_2773;F01_transcript_28332;F01_transcript_2845;F01_transcript_29006;F01_transcript_33081;F01_transcript_36071;F01_transcript_55165;F01_transcript_70833;F01_transcript_7730;F01_transcript_91849;F01_transcript_94919;F01_transcript_96035;	K07466+K10754+K10756+K02327+K10756+K10739+K03505+K10755+K04802+K10747+K10739+K07466+K03111
Homologous recombination	ko03440	8	F01_transcript_114076;F01_transcript_2845;F01_transcript_33081;F01_transcript_36071;F01_transcript_73895;F01_transcript_91849;F01_transcript_94919;F01_transcript_96035;	K07466+K02327+K10739+K03505+K03165+K10739+K07466+K03111
Non-homologous end-joining	ko03450	2	F01_transcript_15386;F01_transcript_28671;	K10885+K04799
Phosphatidylinositol signaling system	ko04070	18	F01_transcript_12249;F01_transcript_16010;F01_transcript_20296;F01_transcript_28914;F01_transcript_29642;F01_transcript_32317;F01_transcript_32677;F01_transcript_36667;F01_transcript_41257;F01_transcript_45818;F01_transcript_48273;F01_transcript_51;F01_transcript_57843;F01_transcript_64201;F01_transcript_79473;F01_transcript_80692;F01_transcript_92676;F01_transcript_93685;	K05857+K05857+K00901+K15422+K01092+K10047+K10047+K02183+K00915+K00913+K00901+K00888+K01110+K18649+K00901+K01110+K02183+K05857
Plant hormone signal transduction	ko04075	19	F01_transcript_102820;F01_transcript_103327;F01_transcript_10743;F01_transcript_110357;F01_transcript_12642;F01_transcript_12699;F01_transcript_13550;F01_transcript_24126;F01_transcript_24737;F01_transcript_26081;F01_transcript_26719;F01_transcript_32803;F01_transcript_33620;F01_transcript_4077;F01_transcript_42695;F01_transcript_55133;F01_transcript_71448;F01_transcript_84599;F01_transcript_9805…	K14496+K14491+K14485+K13416+K14500+K13463+K13946+K14498+K14498+K14498+K14512+K13464+K14490+K14509+K14500+K14500+K14513+K14500+K14490
Ubiquitin mediated proteolysis	ko04120	33	F01_transcript_1;F01_transcript_102886;F01_transcript_103196;F01_transcript_105725;F01_transcript_105883;F01_transcript_112582;F01_transcript_14348;F01_transcript_19923;F01_transcript_23088;F01_transcript_2666;F01_transcript_2833;F01_transcript_34113;F01_transcript_34175;F01_transcript_34540;F01_transcript_34562;F01_transcript_34703;F01_transcript_35583;F01_transcript_35730;F01_transcript_36539;F…	K10592+K10581+K03094+K03355+K03349+K03094+K10685+K10599+K10686+K03178+K10610+K10573+K10688+K03094+K10580+K10573+K10579+K03094+K03094+K10597+K10686+K03363+K03347+K10592+K10684+K03178+K10580+K03178+K03351+K10590+K10592+K10609+K03869
Sulfur relay system	ko04122	3	F01_transcript_24534;F01_transcript_26177;F01_transcript_53273;	K04487+K11996+K01011
SNARE interactions in vesicular transport	ko04130	23	F01_transcript_106947;F01_transcript_110353;F01_transcript_28766;F01_transcript_31170;F01_transcript_31339;F01_transcript_32109;F01_transcript_32465;F01_transcript_32488;F01_transcript_32504;F01_transcript_32811;F01_transcript_32892;F01_transcript_33002;F01_transcript_34031;F01_transcript_35481;F01_transcript_62636;F01_transcript_65499;F01_transcript_74768;F01_transcript_76726;F01_transcript_7832…	K08517+K08516+K08486+K08506+K08490+K08515+K08493+K08495+K08507+K08503+K08498+K08515+K08516+K08505+K08490+K08497+K08504+K08503+K08495+K08506+K08504+K08489+K08493
Regulation of autophagy	ko04140	5	F01_transcript_104867;F01_transcript_113945;F01_transcript_29712;F01_transcript_37149;F01_transcript_84216;	K08342+K08341+K08343+K08341+K07198
Protein processing in endoplasmic reticulum	ko04141	131	F01_transcript_100211;F01_transcript_102621;F01_transcript_103196;F01_transcript_10389;F01_transcript_104756;F01_transcript_10755;F01_transcript_108646;F01_transcript_109335;F01_transcript_112582;F01_transcript_113134;F01_transcript_113914;F01_transcript_114677;F01_transcript_114686;F01_transcript_11682;F01_transcript_11713;F01_transcript_117703;F01_transcript_118466;F01_transcript_118735;F01_tra…	K08057+K08054+K03094+K10085+K13993+K07151+K12669+K10839+K03094+K14018+K13993+K09487+K09580+K04079+K14006+K09580+K10950+K14012+K09517+K14009+K01456+K12667+K14005+K01230+K03283+K10636+K03283+K09490+K03283+K09580+K03283+K04079+K09490+K04523+K12666+K12666+K14007+K14007+K04523+K09580+K09580+K11718+K09503+K08057+K10839+K12666+K13525+K13525+K09503+K13525+K09584+K09503+K12670+K08057+K09584+K14015+K10088+…
Endocytosis	ko04144	68	F01_transcript_100247;F01_transcript_101824;F01_transcript_104602;F01_transcript_105017;F01_transcript_105659;F01_transcript_106907;F01_transcript_113539;F01_transcript_116581;F01_transcript_116874;F01_transcript_12764;F01_transcript_136;F01_transcript_14449;F01_transcript_14568;F01_transcript_15590;F01_transcript_16073;F01_transcript_18484;F01_transcript_18600;F01_transcript_189;F01_transcript_2…	K18467+K12191+K15053+K18442+K07901+K12192+K12471+K07904+K18468+K03283+K18442+K01528+K03283+K03283+K03283+K12190+K12471+K04646+K12483+K11824+K12492+K18443+K11826+K12486+K17917+K10364+K12493+K19476+K10365+K01528+K12185+K07904+K07904+K12193+K07897+K12198+K07904+K07904+K12195+K07897+K07904+K07897+K12188+K12184+K05755+K03283+K12197+K12471+K11824+K07904+K11827+K19366+K01115+K12192+K07937+K12200+K07901+…
Phagosome	ko04145	39	F01_transcript_100211;F01_transcript_102621;F01_transcript_104607;F01_transcript_106947;F01_transcript_111234;F01_transcript_14364;F01_transcript_15047;F01_transcript_21579;F01_transcript_24460;F01_transcript_24474;F01_transcript_25454;F01_transcript_25524;F01_transcript_26586;F01_transcript_29007;F01_transcript_32212;F01_transcript_32412;F01_transcript_33462;F01_transcript_33919;F01_transcript_3…	K08057+K08054+K02151+K08517+K02154+K02145+K02145+K02147+K08057+K02144+K07375+K07374+K08057+K02149+K02149+K07897+K07897+K02150+K07897+K02155+K02152+K02152+K02154+K08057+K02154+K08057+K07889+K07375+K07375+K07897+K08054+K07375+K02154+K07375+K07375+K10956+K07374+K04392+K08054
Peroxisome	ko04146	42	F01_transcript_105173;F01_transcript_11156;F01_transcript_118067;F01_transcript_11858;F01_transcript_12134;F01_transcript_12945;F01_transcript_12964;F01_transcript_14476;F01_transcript_15229;F01_transcript_15259;F01_transcript_21926;F01_transcript_22645;F01_transcript_23082;F01_transcript_23130;F01_transcript_23582;F01_transcript_24382;F01_transcript_25997;F01_transcript_27534;F01_transcript_2844…	K03426+K01897+K12663+K01897+K00232+K01897+K01897+K12261+K01897+K00232+K13336+K13345+K03781+K03781+K00031+K03781+K07513+K00869+K00232+K00306+K13347+K13341+K13347+K11147+K04565+K04564+K04564+K04565+K04565+K07513+K01897+K01578+K13337+K04564+K01897+K04565+K12261+K01897+K07513+K13237+K11147+K13338
Plant-pathogen interaction	ko04626	45	F01_transcript_104623;F01_transcript_10856;F01_transcript_109697;F01_transcript_109700;F01_transcript_110357;F01_transcript_110644;F01_transcript_110783;F01_transcript_11137;F01_transcript_112571;F01_transcript_114677;F01_transcript_11682;F01_transcript_118721;F01_transcript_12243;F01_transcript_14115;F01_transcript_15298;F01_transcript_16397;F01_transcript_16907;F01_transcript_17150;F01_transcri…	K12795+K13413+K00864+K13458+K13416+K13448+K13459+K13412+K13436+K09487+K04079+K18875+K05391+K13412+K13412+K13412+K04079+K18875+K13429+K13412+K13459+K18875+K18875+K13436+K18834+K12795+K12795+K13456+K13448+K13448+K13448+K02183+K13448+K13448+K13412+K04079+K13412+K04079+K09487+K13412+K12795+K02183+K13448+K05391+K13436
Circadian rhythm - plant	ko04712	8	F01_transcript_1087;F01_transcript_113848;F01_transcript_24720;F01_transcript_27506;F01_transcript_5517;F01_transcript_67596;F01_transcript_77536;F01_transcript_84205;	K12121+K00660+K03097+K03097+K12119+K12118+K12120+K00660
AGE-RAGE signaling pathway in diabetic complications	ko04933	5	F01_transcript_12249;F01_transcript_16010;F01_transcript_63058;F01_transcript_90938;F01_transcript_93685;	K05857+K05857+K04371+K04392+K05857

## Sheet: Supplementary Table 5
Supplementary Table 5. Most highly abundence proteins in E. urograndis at different ages.
	Accession	UG-3-1	UG-3-2	UG-3-3	UG-6-1	UG-6-3	UG-6-2	UG-9-1	UG-9-2	UG-9-3	UG-11-2	UG-11-3	COG_class	COG_class_annotation	GO_annotation	KEGG_annotation	KEGG_pathway	KOG_class	KOG_class_annotation	Pfam_annotation	Swissprot_annotation	eggNOG_class	eggNOG_class_annotation	nr_annotation
Most highly abundence proteins in E. urograndis at 3 years old	F01_transcript_33837	216.904	198.639	215.275	235.234	193.89	90.051	169.654	57.2279	78.3163	194.705	85.9694	--	--	Cellular Component: mitochondrion (GO:0005739);; Cellular Component: endoplasmic reticulum (GO:0005783);; Cellular Component: Golgi apparatus (GO:0005794);; Cellular Component: integral component of membrane (GO:0016021);;	K20362|1.12059e-139|pmum:103328562|K20362 protein transport protein YIF1 | (RefSeq) protein YIF1B-like	--	[S]	Function unknown	YIF1	--	S	Function unknown	hypothetical protein EUGRSUZ_H00367 [Eucalyptus grandis]
	F01_transcript_34626	217.633	217.975	185.254	177.2	72.9864	58.1835	80.7931	90.0662	55.0615	123.544	46.3576	[J]	Translation, ribosomal structure and biogenesis	Biological Process: maturation of LSU-rRNA (GO:0000470);; Molecular Function: RNA binding (GO:0003723);; Molecular Function: structural constituent of ribosome (GO:0003735);; Biological Process: translation (GO:0006412);; Cellular Component: cytosolic large ribosomal subunit (GO:0022625);;	K02865|5.67856e-130|gmx:100305550|K02865 large subunit ribosomal protein L10Ae | (RefSeq) uncharacterized LOC100305550	ko03010:Ribosome	[J]	Translation, ribosomal structure and biogenesis	Ribosomal protein L1p/L10e family	60S ribosomal protein L10a-3 GN=RPL10AC OS=Arabidopsis thaliana (Mouse-ear cress) PE=2 SV=1	J	Translation, ribosomal structure and biogenesis	PREDICTED: 60S ribosomal protein L10a-3 [Eucalyptus grandis]
	F01_transcript_36813	203.04	206.695	193.487	179.31	57.3436	54.4206	80.0766	81.4592	41.5451	140.741	30.9013	[J]	Translation, ribosomal structure and biogenesis	Biological Process: ribosomal small subunit assembly (GO:0000028);; Molecular Function: structural constituent of ribosome (GO:0003735);; Biological Process: translation (GO:0006412);; Cellular Component: cytosolic small ribosomal subunit (GO:0022627);;	K02966|3.31609e-92|pop:POPTR_0004s11780g|K02966 small subunit ribosomal protein S19e | (RefSeq) POPTRDRAFT_556400; 40S ribosomal protein S19	ko03010:Ribosome	[J]	Translation, ribosomal structure and biogenesis	Ribosomal protein S19e	40S ribosomal protein S19-3 GN=RPS19C OS=Arabidopsis thaliana (Mouse-ear cress) PE=2 SV=1	J	Translation, ribosomal structure and biogenesis	PREDICTED: 40S ribosomal protein S19-3 [Eucalyptus grandis]
	F01_transcript_35698	192.869	215.876	189.725	166.428	59.4982	50.1637	68.9367	65.7119	34.8609	121.744	24.3044	[J]	Translation, ribosomal structure and biogenesis	Biological Process: ribosomal small subunit assembly (GO:0000028);; Molecular Function: structural constituent of ribosome (GO:0003735);; Biological Process: translation (GO:0006412);; Cellular Component: cytosolic small ribosomal subunit (GO:0022627);;	K02966|3.86065e-88|vvi:100255295|K02966 small subunit ribosomal protein S19e | (RefSeq) 40S ribosomal protein S19-3	ko03010:Ribosome	[J]	Translation, ribosomal structure and biogenesis	Ribosomal protein S19e	40S ribosomal protein S19-3 GN=RPS19C OS=Arabidopsis thaliana (Mouse-ear cress) PE=2 SV=1	J	Translation, ribosomal structure and biogenesis	PREDICTED: 40S ribosomal protein S19-3-like [Eucalyptus grandis]
	F01_transcript_101957	172.544	188.889	220.592	120.188	110.498	73.752	94.4818	66.9887	87.3591	123.688	66.1031	[J]	Translation, ribosomal structure and biogenesis	Molecular Function: nucleotide binding (GO:0000166);; Molecular Function: nucleic acid binding (GO:0003676);;	--	--	[R]	General function prediction only	RNA recognition motif. (a.k.a. RRM, RBD, or RNP domain)	UBP1-associated proteins 1A GN=UBA1A OS=Arabidopsis thaliana (Mouse-ear cress) PE=1 SV=2	S	Function unknown	PREDICTED: RNA-binding protein 38-like [Eucalyptus grandis]
	F01_transcript_1	213.288	170.131	197.104	86.5417	112.095	99.3186	88.2453	88.2453	88.2453	295.4	295.4	--	--	Molecular Function: ubiquitin-protein transferase activity (GO:0004842);; Biological Process: protein ubiquitination (GO:0016567);; Molecular Function: ligase activity (GO:0016874);;	K10592|0|vvi:100255704|K10592 E3 ubiquitin-protein ligase HUWE1 [EC:2.3.2.26] | (RefSeq) E3 ubiquitin-protein ligase UPL2	ko04120:Ubiquitin mediated proteolysis	[OK]	--	Domain of Unknown Function (DUF913);; Domain of Unknown Function (DUF908);; UBA/TS-N domain;; HECT-domain (ubiquitin-transferase)	E3 ubiquitin-protein ligase UPL2 GN=UPL2 OS=Arabidopsis thaliana (Mouse-ear cress) PE=1 SV=3	O	Posttranslational modification, protein turnover, chaperones	PREDICTED: E3 ubiquitin-protein ligase UPL2-like [Eucalyptus grandis]
	F01_transcript_36116	177.195	193.272	209.348	200.85	104.108	152.479	92.068	92.068	92.068	107.649	107.649	--	--	Biological Process: proteolysis (GO:0006508);; Molecular Function: peptidase activity (GO:0008233);;	--	--	--	--	Probable lipid transfer	Non-specific lipid-transfer protein 2 OS=Prunus armeniaca (Apricot) PE=1 SV=1	U	Intracellular trafficking, secretion, and vesicular transport	PREDICTED: non-specific lipid-transfer protein 2-like [Eucalyptus grandis]
	F01_transcript_27564	167.482	200.462	203.885	93.3813	109.64	117.783	102.446	112.933	99.7691	130.504	161.894	[T]	Signal transduction mechanisms	Molecular Function: protein serine/threonine phosphatase activity (GO:0004722);; Biological Process: protein dephosphorylation (GO:0006470);; Molecular Function: metal ion binding (GO:0046872);;	K06269|0|tcc:TCM_042670|K06269 serine/threonine-protein phosphatase PP1 catalytic subunit [EC:3.1.3.16] | (RefSeq) Type one serine/threonine protein phosphatase 4 isoform 1	ko03015:mRNA surveillance pathway	[TR]	--	Calcineurin-like phosphoesterase;; Serine-threonine protein phosphatase N-terminal domain	Serine/threonine-protein phosphatase PP1 isozyme 4 GN=TOPP4 OS=Arabidopsis thaliana (Mouse-ear cress) PE=1 SV=1	T	Signal transduction mechanisms	PREDICTED: serine/threonine-protein phosphatase PP1 isozyme 3 [Eucalyptus grandis]
	F01_transcript_110353	147.559	189.331	231.103	272.152	106.148	189.15	258.409	258.409	258.409	150.452	150.452	--	--	Molecular Function: SNARE binding (GO:0000149);; Molecular Function: SNAP receptor activity (GO:0005484);; Biological Process: exocytosis (GO:0006887);; Biological Process: vesicle fusion (GO:0006906);; Cellular Component: integral component of membrane (GO:0016021);; Cellular Component: SNARE complex (GO:0031201);;	K08516|4.76788e-136|tcc:TCM_037091|K08516 synaptobrevin homolog YKT6 | (RefSeq) SNARE-like superfamily protein	ko04130:SNARE interactions in vesicular transport	[U]	Intracellular trafficking, secretion, and vesicular transport	Synaptobrevin;; Regulated-SNARE-like domain	VAMP-like protein YKT61 (Precursor) GN=YKT61 OS=Arabidopsis thaliana (Mouse-ear cress) PE=2 SV=1	U	Intracellular trafficking, secretion, and vesicular transport	hypothetical protein EUGRSUZ_C00369 [Eucalyptus grandis]
	F01_transcript_105148	205.188	184.047	162.905	117.769	118.158	117.964	75.4864	75.4864	75.4864	128.405	128.405	[M]	Cell wall/membrane/envelope biogenesis	Biological Process: glycolipid biosynthetic process (GO:0009247);; Cellular Component: chloroplast outer membrane (GO:0009707);; Biological Process: nodulation (GO:0009877);; Cellular Component: peribacteroid membrane (GO:0043661);; Molecular Function: digalactosyldiacylglycerol synthase activity (GO:0046481);;	K09480|0|tcc:TCM_005397|K09480 digalactosyldiacylglycerol synthase [EC:2.4.1.241] | (RefSeq) Digalactosyl diacylglycerol deficient 2 isoform 1	ko00561:Glycerolipid metabolism	--	--	Glycosyl transferases group 1;; Glycosyl transferases group 1	Digalactosyldiacylglycerol synthase 2, chloroplastic GN=DGD2 OS=Lotus japonicus (Lotus corniculatus var. japonicus) PE=2 SV=1	I	Lipid transport and metabolism	PREDICTED: digalactosyldiacylglycerol synthase 2, chloroplastic [Eucalyptus grandis]
	F01_transcript_35909	172.34	165.146	214.268	208.385	87.234	50.5474	135.544	114.599	66.1496	58.4481	50.9124	[J]	Translation, ribosomal structure and biogenesis	Molecular Function: RNA binding (GO:0003723);; Molecular Function: structural constituent of ribosome (GO:0003735);; Cellular Component: cytosol (GO:0005829);; Biological Process: translation (GO:0006412);; Cellular Component: small ribosomal subunit (GO:0015935);; Biological Process: ribosome biogenesis (GO:0042254);;	K02964|6.05663e-94|pper:PRUPE_ppa011659mg|K02964 small subunit ribosomal protein S18e | (RefSeq) hypothetical protein	ko03010:Ribosome	[J]	Translation, ribosomal structure and biogenesis	Ribosomal protein S13/S18	40S ribosomal protein S18 GN=RPS18C OS=Arabidopsis thaliana (Mouse-ear cress) PE=1 SV=1	J	Translation, ribosomal structure and biogenesis	PREDICTED: 40S ribosomal protein S18 [Eucalyptus grandis]
	F01_transcript_35915	191.075	179.516	180.658	135.955	153.13	79.7753	201.124	92.2213	85.0475	91.8138	82.0225	[J]	Translation, ribosomal structure and biogenesis	Molecular Function: structural constituent of ribosome (GO:0003735);; Biological Process: translation (GO:0006412);; Molecular Function: rRNA binding (GO:0019843);; Cellular Component: cytosolic large ribosomal subunit (GO:0022625);; Molecular Function: metal ion binding (GO:0046872);;	K02922|9.02053e-49|tcc:TCM_028744|K02922 large subunit ribosomal protein L37e | (RefSeq) Zinc-binding ribosomal protein family protein	ko03010:Ribosome	[J]	Translation, ribosomal structure and biogenesis	Ribosomal protein L37e	60S ribosomal protein L37-3 GN=RPL37C OS=Arabidopsis thaliana (Mouse-ear cress) PE=3 SV=1	J	Translation, ribosomal structure and biogenesis	hypothetical protein EUGRSUZ_F03027 [Eucalyptus grandis]
	F01_transcript_73577	201.212	133.512	214.848	300.303	69.8485	49.7699	99.5455	72.3926	69.3252	75	35.1227	[J]	Translation, ribosomal structure and biogenesis	Molecular Function: structural constituent of ribosome (GO:0003735);; Biological Process: translation (GO:0006412);; Cellular Component: cytosolic small ribosomal subunit (GO:0022627);;	K02949|1.21945e-85|cam:101507753|K02949 small subunit ribosomal protein S11e | (RefSeq) 40S ribosomal protein S11	ko03010:Ribosome	[J]	Translation, ribosomal structure and biogenesis	Ribosomal_S17 N-terminal;; Ribosomal protein S17	40S ribosomal protein S11 GN=RPS11 OS=Glycine max (Soybean) PE=2 SV=2	J	Translation, ribosomal structure and biogenesis	PREDICTED: 40S ribosomal protein S11-like [Eucalyptus grandis]
	F01_transcript_37485	164.633	183.566	191.487	153.494	74.587	57.9545	89.8348	83.2168	61.9755	133.545	37.6748	[J]	Translation, ribosomal structure and biogenesis	Molecular Function: RNA binding (GO:0003723);; Molecular Function: structural constituent of ribosome (GO:0003735);; Biological Process: translation (GO:0006412);; Cellular Component: cytosolic large ribosomal subunit (GO:0022625);;	K02908|4.11267e-73|sly:101254162|K02908 large subunit ribosomal protein L30e | (RefSeq) 60S ribosomal protein L30	ko03010:Ribosome	[J]	Translation, ribosomal structure and biogenesis	Ribosomal protein L7Ae/L30e/S12e/Gadd45 family	60S ribosomal protein L30 GN=RPL30 OS=Lupinus luteus (European yellow lupin) PE=3 SV=1	J	Translation, ribosomal structure and biogenesis	PREDICTED: 60S ribosomal protein L30 [Eucalyptus grandis]
	F01_transcript_41022	174.245	171.226	193.432	173.89	119.183	146.536	233.925	233.925	233.925	102.664	102.664	[J]	Translation, ribosomal structure and biogenesis	Biological Process: ribosomal large subunit assembly (GO:0000027);; Molecular Function: structural constituent of ribosome (GO:0003735);; Biological Process: translation (GO:0006412);; Cellular Component: cytosolic large ribosomal subunit (GO:0022625);; Biological Process: assembly of large subunit precursor of preribosome (GO:1902626);;	K02896|5.51683e-71|mtr:MTR_1g061670|K02896 large subunit ribosomal protein L24e | (RefSeq) 60S ribosomal protein L24-2	ko03010:Ribosome	[J]	Translation, ribosomal structure and biogenesis	Ribosomal protein L24e	60S ribosomal protein L24 GN=RPL24 OS=Cicer arietinum (Chickpea) PE=2 SV=1	J	Translation, ribosomal structure and biogenesis	PREDICTED: 60S ribosomal protein L24-like [Eucalyptus grandis]
	F01_transcript_34789	148.25	177.778	207.306	197.26	147.336	172.298	111.263	111.263	111.263	154.186	154.186	--	--	Cellular Component: endomembrane system (GO:0012505);; Cellular Component: integral component of membrane (GO:0016021);; Cellular Component: intracellular membrane-bounded organelle (GO:0043231);; Cellular Component: cytoplasmic part (GO:0044444);;	--	--	[U]	Intracellular trafficking, secretion, and vesicular transport	PRA1 family protein	PRA1 family protein E GN=F22O13.26 OS=Arabidopsis thaliana (Mouse-ear cress) PE=1 SV=1	U	Intracellular trafficking, secretion, and vesicular transport	PREDICTED: PRA1 family protein E-like [Eucalyptus grandis]
	F01_transcript_36831	184.893	150.635	196.39	213.102	81.9519	50.363	90.6417	112.25	71.5064	68.984	59.6189	[J]	Translation, ribosomal structure and biogenesis	Molecular Function: structural constituent of ribosome (GO:0003735);; Biological Process: translation (GO:0006412);; Cellular Component: integral component of membrane (GO:0016021);; Cellular Component: cytosolic small ribosomal subunit (GO:0022627);;	K02973|2.63585e-96|sot:102577739|K02973 small subunit ribosomal protein S23e | (RefSeq) uncharacterized LOC102577739	ko03010:Ribosome	[J]	Translation, ribosomal structure and biogenesis	Ribosomal protein S12/S23	40S ribosomal protein S23 GN=RPS23 OS=Fragaria ananassa (Strawberry) PE=2 SV=1	J	Translation, ribosomal structure and biogenesis	unnamed protein product [Coffea canephora]
	F01_transcript_45796	227.092	177.092	127.092	120.983	131.607	126.295	135.193	135.193	135.193	87.7822	87.7822	--	--	--	--	--	[T]	Signal transduction mechanisms	Protein of unknown function (DUF773);; Protein of unknown function (DUF773)	CDK5RAP3-like protein GN=At5g06830 OS=Arabidopsis thaliana (Mouse-ear cress) PE=2 SV=2	S	Function unknown	PREDICTED: CDK5RAP3-like protein [Eucalyptus grandis]
	F01_transcript_36318	169.777	146.607	214.104	171.262	71.8982	55.3557	63.9449	82.7473	72.8536	51.4316	33.0335	[J]	Translation, ribosomal structure and biogenesis	Molecular Function: structural constituent of ribosome (GO:0003735);; Cellular Component: nucleolus (GO:0005730);; Biological Process: translation (GO:0006412);; Cellular Component: cytosolic small ribosomal subunit (GO:0022627);; Molecular Function: small ribosomal subunit rRNA binding (GO:0070181);;	K02953|2.71865e-97|pxb:103930485|K02953 small subunit ribosomal protein S13e | (RefSeq) 40S ribosomal protein S13	ko03010:Ribosome	[J]	Translation, ribosomal structure and biogenesis	Ribosomal S13/S15 N-terminal domain;; Ribosomal protein S15	40S ribosomal protein S13 GN=RPS13 OS=Glycine max (Soybean) PE=2 SV=1	J	Translation, ribosomal structure and biogenesis	PREDICTED: 40S ribosomal protein S13 [Eucalyptus grandis]
	F01_transcript_97861	164.791	176.243	187.696	160.471	65.5759	113.024	76.5707	76.5707	76.5707	161.257	161.257	[J]	Translation, ribosomal structure and biogenesis	Biological Process: ribosomal small subunit assembly (GO:0000028);; Molecular Function: structural constituent of ribosome (GO:0003735);; Biological Process: translation (GO:0006412);; Cellular Component: cytosolic small ribosomal subunit (GO:0022627);;	K02966|1.9912e-94|pop:POPTR_0004s11780g|K02966 small subunit ribosomal protein S19e | (RefSeq) POPTRDRAFT_556400; 40S ribosomal protein S19	ko03010:Ribosome	[J]	Translation, ribosomal structure and biogenesis	Ribosomal protein S19e	40S ribosomal protein S19-3 GN=RPS19C OS=Arabidopsis thaliana (Mouse-ear cress) PE=2 SV=1	J	Translation, ribosomal structure and biogenesis	PREDICTED: 40S ribosomal protein S19-3-like [Eucalyptus grandis]
Most highly abundence proteins in E. urograndis at 6 years old	F01_transcript_68884	61.512	61.512	61.512	245.876	245.876	245.876	36.0395	51.3746	20.7045	35.9966	35.9966	--	--	Molecular Function: binding (GO:0005488);; Cellular Component: integral component of membrane (GO:0016021);; Biological Process: oxidation-reduction process (GO:0055114);;	--	--	[R]	General function prediction only	Protein of unknown function (DUF568)	Cytochrome b561 and DOMON domain-containing protein At3g25290 (Precursor) GN=At3g25290 OS=Arabidopsis thaliana (Mouse-ear cress) PE=2 SV=1	L	Replication, recombination and repair	PREDICTED: cytochrome b561 and DOMON domain-containing protein At4g12980-like [Eucalyptus grandis]
	F01_transcript_105211	104.613	93.8263	83.0393	117.503	368.114	242.809	81.9539	81.9539	81.9539	94.5726	94.5726	[L]	Replication, recombination and repair	Molecular Function: nucleic acid binding (GO:0003676);; Molecular Function: ATP-dependent RNA helicase activity (GO:0004004);; Molecular Function: ATP binding (GO:0005524);; Biological Process: RNA secondary structure unwinding (GO:0010501);;	K14810|5.22299e-112|vvi:100853002|K14810 ATP-dependent RNA helicase DDX56/DBP9 [EC:3.6.4.13] | (RefSeq) DEAD-box ATP-dependent RNA helicase 16-like	--	[A]	RNA processing and modification	DEAD/DEAH box helicase;; Type III restriction enzyme, res subunit	DEAD-box ATP-dependent RNA helicase 16 GN=RH16 OS=Arabidopsis thaliana (Mouse-ear cress) PE=2 SV=1	L	Replication, recombination and repair	PREDICTED: DEAD-box ATP-dependent RNA helicase 16 [Eucalyptus grandis]
	F01_transcript_33837	216.904	198.639	215.275	235.234	193.89	90.051	169.654	57.2279	78.3163	194.705	85.9694	--	--	Cellular Component: mitochondrion (GO:0005739);; Cellular Component: endoplasmic reticulum (GO:0005783);; Cellular Component: Golgi apparatus (GO:0005794);; Cellular Component: integral component of membrane (GO:0016021);;	K20362|1.12059e-139|pmum:103328562|K20362 protein transport protein YIF1 | (RefSeq) protein YIF1B-like	--	[S]	Function unknown	YIF1	--	S	Function unknown	hypothetical protein EUGRSUZ_H00367 [Eucalyptus grandis]
	F01_transcript_20375	131.77	85.0156	153.404	315.885	93.0408	93.8606	149.47	123.725	120.083	115.28	101.769	[E]	Amino acid transport and metabolism	Molecular Function: glycine hydroxymethyltransferase activity (GO:0004372);; Biological Process: glycine metabolic process (GO:0006544);; Biological Process: L-serine metabolic process (GO:0006563);; Molecular Function: methyltransferase activity (GO:0008168);; Molecular Function: pyridoxal phosphate binding (GO:0030170);; Biological Process: methylation (GO:0032259);; Biological Process: tetrahy…	K00600|0|cmo:103493017|K00600 glycine hydroxymethyltransferase [EC:2.1.2.1] | (RefSeq) serine hydroxymethyltransferase 3, chloroplastic	ko00260:Glycine, serine and threonine metabolism;ko00460:Cyanoamino acid metabolism;ko00630:Glyoxylate and dicarboxylate metabolism;ko00670:One carbon pool by folate;ko01200:Carbon metabolism;ko01230:Biosynthesis of amino acids	[E]	Amino acid transport and metabolism	Serine hydroxymethyltransferase;; Serine hydroxymethyltransferase	Serine hydroxymethyltransferase 3, chloroplastic (Precursor) GN=F8B4.220 OS=Arabidopsis thaliana (Mouse-ear cress) PE=1 SV=2	E	Amino acid transport and metabolism	PREDICTED: serine hydroxymethyltransferase 3, chloroplastic [Eucalyptus grandis]
	F01_transcript_35938	73.8329	107.862	141.892	112.531	295.332	203.931	61.7936	61.7936	61.7936	74.4472	74.4472	[J]	Translation, ribosomal structure and biogenesis	Biological Process: ribosomal large subunit assembly (GO:0000027);; Molecular Function: structural constituent of ribosome (GO:0003735);; Biological Process: translation (GO:0006412);; Molecular Function: rRNA binding (GO:0019843);; Cellular Component: cytosolic large ribosomal subunit (GO:0022625);;	K02870|5.0621e-108|vvi:100244384|K02870 large subunit ribosomal protein L12e | (RefSeq) 60S ribosomal protein L12-like	ko03010:Ribosome	[J]	Translation, ribosomal structure and biogenesis	Ribosomal protein L11, N-terminal domain;; Ribosomal protein L11, RNA binding domain	60S ribosomal protein L12-1 GN=RPL12A OS=Arabidopsis thaliana (Mouse-ear cress) PE=2 SV=2	J	Translation, ribosomal structure and biogenesis	PREDICTED: 60S ribosomal protein L12-1 [Eucalyptus grandis]
	F01_transcript_73862	167.69	171.907	182.159	279.242	122.744	89.9676	237.545	136.138	84.6818	127.978	118.554	--	--	--	--	--	--	--	Probable lipid transfer	Non-specific lipid-transfer protein 2 OS=Prunus armeniaca (Apricot) PE=1 SV=1	U	Intracellular trafficking, secretion, and vesicular transport	PREDICTED: non-specific lipid-transfer protein 2-like [Eucalyptus grandis]
	F01_transcript_38085	139.731	125.681	157.576	310.269	87.3737	127.237	213.3	140.597	102.983	170.202	181.712	--	--	Cellular Component: mitochondrial respiratory chain complex I (GO:0005747);; Cellular Component: vacuolar membrane (GO:0005774);;	--	--	--	--	--	--	S	Function unknown	PREDICTED: uncharacterized protein LOC104445840 [Eucalyptus grandis]
	F01_transcript_5639	141.176	115.942	141.176	227.778	158.497	75.1553	216.176	117.081	111.18	158.987	101.863	[F]	Nucleotide transport and metabolism	Molecular Function: AMP deaminase activity (GO:0003876);; Cellular Component: nucleus (GO:0005634);; Cellular Component: cytosol (GO:0005829);; Biological Process: response to abscisic acid (GO:0009737);; Biological Process: embryo development ending in seed dormancy (GO:0009793);; Cellular Component: integral component of mitochondrial outer membrane (GO:0031307);; Biological Process: IMP salvag…	K01490|0|pmum:103341659|K01490 AMP deaminase [EC:3.5.4.6] | (RefSeq) AMP deaminase	ko00230:Purine metabolism	[F]	Nucleotide transport and metabolism	Adenosine/AMP deaminase	AMP deaminase GN=F16M14.21 OS=Arabidopsis thaliana (Mouse-ear cress) PE=1 SV=2	F	Nucleotide transport and metabolism	PREDICTED: AMP deaminase [Eucalyptus grandis]
	F01_transcript_36242	169.516	142.204	157.097	298.387	82.9032	190.645	149.032	149.032	149.032	71.9355	71.9355	--	--	Molecular Function: structural constituent of ribosome (GO:0003735);; Biological Process: translation (GO:0006412);; Cellular Component: cytosolic large ribosomal subunit (GO:0022625);;	K02903|3.42212e-85|gmx:100500189|K02903 large subunit ribosomal protein L28e | (RefSeq) uncharacterized LOC100500189	ko03010:Ribosome	[J]	Translation, ribosomal structure and biogenesis	Ribosomal L28e protein family	60S ribosomal protein L28-2 GN=RPL28C OS=Arabidopsis thaliana (Mouse-ear cress) PE=2 SV=1	J	Translation, ribosomal structure and biogenesis	PREDICTED: 60S ribosomal protein L28-2-like [Eucalyptus grandis]
	F01_transcript_110353	147.559	189.331	231.103	272.152	106.148	189.15	258.409	258.409	258.409	150.452	150.452	--	--	Molecular Function: SNARE binding (GO:0000149);; Molecular Function: SNAP receptor activity (GO:0005484);; Biological Process: exocytosis (GO:0006887);; Biological Process: vesicle fusion (GO:0006906);; Cellular Component: integral component of membrane (GO:0016021);; Cellular Component: SNARE complex (GO:0031201);;	K08516|4.76788e-136|tcc:TCM_037091|K08516 synaptobrevin homolog YKT6 | (RefSeq) SNARE-like superfamily protein	ko04130:SNARE interactions in vesicular transport	[U]	Intracellular trafficking, secretion, and vesicular transport	Synaptobrevin;; Regulated-SNARE-like domain	VAMP-like protein YKT61 (Precursor) GN=YKT61 OS=Arabidopsis thaliana (Mouse-ear cress) PE=2 SV=1	U	Intracellular trafficking, secretion, and vesicular transport	hypothetical protein EUGRSUZ_C00369 [Eucalyptus grandis]
	F01_transcript_34200	149.649	157.325	182.246	263.158	113.158	98.62	104.211	68.0467	71.5499	169.649	141.401	--	--	Cellular Component: integral component of membrane (GO:0016021);;	--	--	--	--	Protein of unknown function (DUF1218)	--	S	Function unknown	PREDICTED: uncharacterized protein LOC104450148 [Eucalyptus grandis]
	F01_transcript_35974	107.712	156.013	204.314	270.458	103.529	186.993	73.2026	73.2026	73.2026	55.9477	55.9477	[J]	Translation, ribosomal structure and biogenesis	Biological Process: cytoplasmic translation (GO:0002181);; Molecular Function: structural constituent of ribosome (GO:0003735);; Cellular Component: cytosolic large ribosomal subunit (GO:0022625);; Biological Process: ribosomal large subunit biogenesis (GO:0042273);;	K02917|2.21634e-72|pop:POPTR_0010s20140g|K02917 large subunit ribosomal protein L35Ae | (RefSeq) POPTRDRAFT_833785; 60S ribosomal protein L35a	ko03010:Ribosome	[J]	Translation, ribosomal structure and biogenesis	Ribosomal protein L35Ae	60S ribosomal protein L35a-3 GN=RPL35AC OS=Arabidopsis thaliana (Mouse-ear cress) PE=3 SV=1	J	Translation, ribosomal structure and biogenesis	PREDICTED: 60S ribosomal protein L35a-3 [Eucalyptus grandis]
	F01_transcript_37645	145.861	146.854	149.702	312.086	58.9404	185.513	120.033	120.033	120.033	127.318	127.318	--	--	Biological Process: cytoplasmic translation (GO:0002181);; Molecular Function: structural constituent of ribosome (GO:0003735);; Cellular Component: cytosolic large ribosomal subunit (GO:0022625);;	--	--	[J]	Translation, ribosomal structure and biogenesis	Ribosomal protein L31e	60S ribosomal protein L31 GN=RPL31 OS=Nicotiana glutinosa (Tobacco) PE=2 SV=1	J	Translation, ribosomal structure and biogenesis	PREDICTED: 60S ribosomal protein L31 isoform X1 [Eucalyptus grandis]
	F01_transcript_73577	201.212	133.512	214.848	300.303	69.8485	49.7699	99.5455	72.3926	69.3252	75	35.1227	[J]	Translation, ribosomal structure and biogenesis	Molecular Function: structural constituent of ribosome (GO:0003735);; Biological Process: translation (GO:0006412);; Cellular Component: cytosolic small ribosomal subunit (GO:0022627);;	K02949|1.21945e-85|cam:101507753|K02949 small subunit ribosomal protein S11e | (RefSeq) 40S ribosomal protein S11	ko03010:Ribosome	[J]	Translation, ribosomal structure and biogenesis	Ribosomal_S17 N-terminal;; Ribosomal protein S17	40S ribosomal protein S11 GN=RPS11 OS=Glycine max (Soybean) PE=2 SV=2	J	Translation, ribosomal structure and biogenesis	PREDICTED: 40S ribosomal protein S11-like [Eucalyptus grandis]
	F01_transcript_37428	158.789	110.779	157.755	280.207	80.3545	61.8997	195.569	222.625	76.6275	61.4476	68.3031	[J]	Translation, ribosomal structure and biogenesis	Biological Process: ribosomal large subunit assembly (GO:0000027);; Molecular Function: nucleotide binding (GO:0000166);; Molecular Function: structural constituent of ribosome (GO:0003735);; Biological Process: translation (GO:0006412);; Cellular Component: cytosolic large ribosomal subunit (GO:0022625);;	K02893|7.23838e-72|pper:PRUPE_ppa012791mg|K02893 large subunit ribosomal protein L23Ae | (RefSeq) hypothetical protein	ko03010:Ribosome	[J]	Translation, ribosomal structure and biogenesis	Ribosomal protein L23, N-terminal domain;; Ribosomal protein L23	60S ribosomal protein L23a GN=RPL23A OS=Daucus carota (Wild carrot) PE=2 SV=1	J	Translation, ribosomal structure and biogenesis	PREDICTED: LOW QUALITY PROTEIN: 60S ribosomal protein L23a-like [Eucalyptus grandis]
	F01_transcript_7875	87.1636	87.1636	87.1636	179.71	179.71	179.71	100.776	96.6874	104.865	52.6915	52.6915	[M]	Cell wall/membrane/envelope biogenesis	Molecular Function: signal transducer, downstream of receptor, with serine/threonine kinase activity (GO:0004702);; Molecular Function: ATP binding (GO:0005524);; Cellular Component: chromosome (GO:0005694);; Cellular Component: cytoplasm (GO:0005737);; Biological Process: protein phosphorylation (GO:0006468);; Cellular Component: intracellular membrane-bounded organelle (GO:0043231);;	--	--	[T]	Signal transduction mechanisms	Protein kinase domain;; Protein tyrosine kinase	Mitogen-activated protein kinase kinase kinase 2 GN=ANP2 OS=Arabidopsis thaliana (Mouse-ear cress) PE=2 SV=1	T	Signal transduction mechanisms	PREDICTED: STE20-like serine/threonine-protein kinase isoform X1 [Eucalyptus grandis]
	F01_transcript_102335	117.014	117.014	117.014	179.63	179.63	179.63	102.894	117.477	88.3102	92.0139	92.0139	[Q]	Secondary metabolites biosynthesis, transport and catabolism	Molecular Function: iron ion binding (GO:0005506);; Molecular Function: dioxygenase activity (GO:0051213);; Biological Process: oxidation-reduction process (GO:0055114);;	--	--	[QR]	--	2OG-Fe(II) oxygenase superfamily;; non-haem dioxygenase in morphine synthesis N-terminal	Thebaine 6-O-demethylase GN=T6ODM OS=Papaver somniferum (Opium poppy) PE=1 SV=1	S	Function unknown	PREDICTED: thebaine 6-O-demethylase-like [Eucalyptus grandis]
	F01_transcript_36928	69.8193	69.8193	69.8193	178.002	178.002	178.002	95.1647	92.2423	98.0871	99.4687	99.4687	[T]	Signal transduction mechanisms	Cellular Component: plasma membrane (GO:0005886);; Biological Process: response to stress (GO:0006950);; Molecular Function: hydrolase activity (GO:0016787);;	--	--	--	--	Universal stress protein family	Universal stress protein A-like protein GN=At3g01520 OS=Arabidopsis thaliana (Mouse-ear cress) PE=1 SV=2	S	Function unknown	hypothetical protein EUGRSUZ_F02899 [Eucalyptus grandis]
	F01_transcript_38377	92.3969	73.5849	89.3041	180.155	172.165	141.929	142.655	118.449	95.8071	125.258	99.1614	--	--	--	--	--	--	--	Gibberellin regulated protein	Snakin-2 (Precursor) GN=SN2 OS=Solanum tuberosum (Potato) PE=1 SV=1	O	Posttranslational modification, protein turnover, chaperones	PREDICTED: snakin-2-like [Eucalyptus grandis]
	F01_transcript_35677	114.863	115.296	115.729	260.75	88.7446	174.747	161.183	161.183	161.183	168.687	168.687	--	--	Molecular Function: DNA binding (GO:0003677);;	--	--	--	--	Remorin, C-terminal region;; Remorin, N-terminal region	Remorin OS=Solanum tuberosum (Potato) PE=1 SV=1	S	Function unknown	PREDICTED: remorin-like [Eucalyptus grandis]
Most highly abundence proteins in E. urograndis at 9 years old	F01_transcript_32738	84.4615	73.4615	62.4615	241.846	88.3077	165.077	391.692	391.692	391.692	108	108	[P]	Inorganic ion transport and metabolism	Molecular Function: superoxide dismutase activity (GO:0004784);; Biological Process: removal of superoxide radicals (GO:0019430);; Cellular Component: chloroplast part (GO:0044434);; Molecular Function: metal ion binding (GO:0046872);; Biological Process: oxidation-reduction process (GO:0055114);;	--	--	[P]	Inorganic ion transport and metabolism	Iron/manganese superoxide dismutases, C-terminal domain;; Iron/manganese superoxide dismutases, alpha-hairpin domain	Superoxide dismutase [Fe], chloroplastic (Precursor) GN=SODB OS=Glycine max (Soybean) PE=1 SV=1	P	Inorganic ion transport and metabolism	hypothetical protein EUGRSUZ_K00110 [Eucalyptus grandis]
	F01_transcript_66742	131.074	105.856	164.834	134.655	123.913	177.477	99.3606	758.108	91.4414	141.304	118.468	[C]	Energy production and conversion	Molecular Function: electron carrier activity (GO:0009055);; Molecular Function: iron-sulfur cluster binding (GO:0051536);;	--	--	[C]	Energy production and conversion	--	--	S	Function unknown	hypothetical protein EUGRSUZ_H00712 [Eucalyptus grandis]
	F01_transcript_69790	80.775	117.511	154.247	202.683	97.9136	150.298	265.872	265.872	265.872	141.729	141.729	[J]	Translation, ribosomal structure and biogenesis	Molecular Function: amidase activity (GO:0004040);; Cellular Component: vacuolar membrane (GO:0005774);; Cellular Component: endoplasmic reticulum (GO:0005783);; Cellular Component: Golgi apparatus (GO:0005794);; Cellular Component: plasma membrane (GO:0005886);; Cellular Component: integral component of membrane (GO:0016021);; Molecular Function: transferase activity (GO:0016740);; Molecular Fun…	--	--	[J]	Translation, ribosomal structure and biogenesis	Amidase	Fatty acid amide hydrolase GN=FAAH OS=Arabidopsis thaliana (Mouse-ear cress) PE=1 SV=1	J	Translation, ribosomal structure and biogenesis	PREDICTED: fatty acid amide hydrolase-like isoform X2 [Eucalyptus grandis]
	F01_transcript_32089	100.604	100.604	100.604	100.302	100.302	100.302	260.045	101.36	418.731	85.3474	85.3474	[I]	Lipid transport and metabolism	Molecular Function: isopentenyl-diphosphate delta-isomerase activity (GO:0004452);; Biological Process: isoprenoid biosynthetic process (GO:0008299);; Biological Process: photosynthesis (GO:0015979);; Biological Process: chlorophyll biosynthetic process (GO:0015995);; Molecular Function: hydrolase activity (GO:0016787);; Molecular Function: metal ion binding (GO:0046872);; Biological Process: dim…	K01823|9.66068e-149|pper:PRUPE_ppa009267mg|K01823 isopentenyl-diphosphate Delta-isomerase [EC:5.3.3.2] | (RefSeq) hypothetical protein	ko00900:Terpenoid backbone biosynthesis	[Q]	Secondary metabolites biosynthesis, transport and catabolism	NUDIX domain	Isopentenyl-diphosphate Delta-isomerase II GN=IPI2 OS=Camptotheca acuminata (Happy tree) PE=2 SV=1	I	Lipid transport and metabolism	PREDICTED: isopentenyl-diphosphate Delta-isomerase I-like [Eucalyptus grandis]
	F01_transcript_110353	147.559	189.331	231.103	272.152	106.148	189.15	258.409	258.409	258.409	150.452	150.452	--	--	Molecular Function: SNARE binding (GO:0000149);; Molecular Function: SNAP receptor activity (GO:0005484);; Biological Process: exocytosis (GO:0006887);; Biological Process: vesicle fusion (GO:0006906);; Cellular Component: integral component of membrane (GO:0016021);; Cellular Component: SNARE complex (GO:0031201);;	K08516|4.76788e-136|tcc:TCM_037091|K08516 synaptobrevin homolog YKT6 | (RefSeq) SNARE-like superfamily protein	ko04130:SNARE interactions in vesicular transport	[U]	Intracellular trafficking, secretion, and vesicular transport	Synaptobrevin;; Regulated-SNARE-like domain	VAMP-like protein YKT61 (Precursor) GN=YKT61 OS=Arabidopsis thaliana (Mouse-ear cress) PE=2 SV=1	U	Intracellular trafficking, secretion, and vesicular transport	hypothetical protein EUGRSUZ_C00369 [Eucalyptus grandis]
	F01_transcript_29017	84.6498	96.9449	109.24	236.513	96.5723	166.542	255.142	255.142	255.142	161.252	161.252	[G]	Carbohydrate transport and metabolism	Molecular Function: RNA binding (GO:0003723);; Molecular Function: structural constituent of ribosome (GO:0003735);; Cellular Component: endoplasmic reticulum (GO:0005783);; Cellular Component: ribosome (GO:0005840);; Cellular Component: plasma membrane (GO:0005886);; Biological Process: translation (GO:0006412);; Cellular Component: plant-type cell wall (GO:0009505);; Cellular Component: plasmod…	--	--	[R]	General function prediction only	Strictosidine synthase;; SMP-30/Gluconolaconase/LRE-like region	Protein STRICTOSIDINE SYNTHASE-LIKE 10 {ECO:0000303|PubMed:10777701} (Precursor) OS=Arabidopsis thaliana (Mouse-ear cress) PE=2 SV=1	G	Carbohydrate transport and metabolism	PREDICTED: strictosidine synthase 1-like [Eucalyptus grandis]
	F01_transcript_41022	174.245	171.226	193.432	173.89	119.183	146.536	233.925	233.925	233.925	102.664	102.664	[J]	Translation, ribosomal structure and biogenesis	Biological Process: ribosomal large subunit assembly (GO:0000027);; Molecular Function: structural constituent of ribosome (GO:0003735);; Biological Process: translation (GO:0006412);; Cellular Component: cytosolic large ribosomal subunit (GO:0022625);; Biological Process: assembly of large subunit precursor of preribosome (GO:1902626);;	K02896|5.51683e-71|mtr:MTR_1g061670|K02896 large subunit ribosomal protein L24e | (RefSeq) 60S ribosomal protein L24-2	ko03010:Ribosome	[J]	Translation, ribosomal structure and biogenesis	Ribosomal protein L24e	60S ribosomal protein L24 GN=RPL24 OS=Cicer arietinum (Chickpea) PE=2 SV=1	J	Translation, ribosomal structure and biogenesis	PREDICTED: 60S ribosomal protein L24-like [Eucalyptus grandis]
	F01_transcript_26996	106.028	103.901	101.773	94.0898	103.073	98.5816	229.314	229.314	229.314	93.1442	93.1442	--	--	Molecular Function: obsolete gamma-glutamyltransferase activity (GO:0003840);;	--	--	--	--	Fasciclin domain	Fasciclin-like arabinogalactan protein 1 (Precursor) GN=FLA1 OS=Arabidopsis thaliana (Mouse-ear cress) PE=1 SV=1	M	Cell wall/membrane/envelope biogenesis	PREDICTED: fasciclin-like arabinogalactan protein 1 [Eucalyptus grandis]
	F01_transcript_41464	95.8904	104.359	112.827	137.733	78.2067	107.97	225.903	225.903	225.903	121.295	121.295	--	--	Cellular Component: nuclear envelope (GO:0005635);; Cellular Component: cytoplasm (GO:0005737);; Biological Process: protein import into nucleus (GO:0006606);; Molecular Function: Ran GTPase binding (GO:0008536);;	--	--	[U]	Intracellular trafficking, secretion, and vesicular transport	Nuclear transport factor 2 (NTF2) domain	Nuclear transport factor 2 GN=NTF2 OS=Arabidopsis thaliana (Mouse-ear cress) PE=1 SV=1	U	Intracellular trafficking, secretion, and vesicular transport	PREDICTED: nuclear transport factor 2 [Eucalyptus grandis]
	F01_transcript_27866	103.683	126.398	149.113	146.794	122.374	134.584	203.411	203.411	203.411	129.468	129.468	[O]	Posttranslational modification, protein turnover, chaperones	Cellular Component: nucleolus (GO:0005730);; Cellular Component: vacuolar membrane (GO:0005774);; Cellular Component: endoplasmic reticulum membrane (GO:0005789);; Cellular Component: Golgi apparatus (GO:0005794);; Cellular Component: plasmodesma (GO:0009506);; Molecular Function: cholesterol binding (GO:0015485);; Cellular Component: integral component of membrane (GO:0016021);; Biological Proce…	--	--	[R]	General function prediction only	SPFH domain / Band 7 family	--	O	Posttranslational modification, protein turnover, chaperones	PREDICTED: erlin-2-B [Eucalyptus grandis]
	F01_transcript_94372	60.4027	80.9284	101.454	108.837	101.566	105.201	200	200	200	110.738	110.738	[R]	General function prediction only	Molecular Function: histone acetyltransferase activity (GO:0004402);; Cellular Component: nucleus (GO:0005634);; Biological Process: histone acetylation (GO:0016573);;	K10752|0|tcc:TCM_042342|K10752 histone-binding protein RBBP4 | (RefSeq) Transducin/WD40 repeat-like superfamily protein	--	[B]	Chromatin structure and dynamics	WD domain, G-beta repeat;; Anaphase-promoting complex subunit 4 WD40 domain;; Histone-binding protein RBBP4 or subunit C of CAF1 complex	WD-40 repeat-containing protein MSI1 GN=MSI1 OS=Solanum lycopersicum (Tomato) PE=2 SV=1	S	Function unknown	PREDICTED: WD-40 repeat-containing protein MSI1 [Eucalyptus grandis]
	F01_transcript_27767	121.571	123.643	125.714	208.571	97.5714	153.071	199.571	199.571	199.571	147	147	[J]	Translation, ribosomal structure and biogenesis	Molecular Function: nucleotide binding (GO:0000166);; Molecular Function: nucleic acid binding (GO:0003676);; Cellular Component: integral component of membrane (GO:0016021);; Cellular Component: viral nucleocapsid (GO:0019013);; Cellular Component: intracellular ribonucleoprotein complex (GO:0030529);;	K12741|5.56228e-108|vvi:100265210|K12741 heterogeneous nuclear ribonucleoprotein A1/A3 | (RefSeq) heterogeneous nuclear ribonucleoprotein 27C-like	ko03040:Spliceosome	[R]	General function prediction only	RNA recognition motif. (a.k.a. RRM, RBD, or RNP domain);; RNA recognition motif	Heterogeneous nuclear ribonucleoprotein 1 GN=RNP1 OS=Arabidopsis thaliana (Mouse-ear cress) PE=1 SV=1	S	Function unknown	PREDICTED: heterogeneous nuclear ribonucleoprotein 1 [Eucalyptus grandis]
	F01_transcript_68953	84.1545	84.1545	84.1545	108.921	108.921	108.921	196.804	156.325	237.284	112.25	112.25	--	--	Cellular Component: integral component of membrane (GO:0016021);;	--	--	--	--	Probable lipid transfer;; Protease inhibitor/seed storage/LTP family	--	S	Function unknown	hypothetical protein EUGRSUZ_E00466 [Eucalyptus grandis]
	F01_transcript_64293	127.273	63.1107	114.545	189.917	107.603	54.5364	350.248	93.0209	144.566	167.438	142.971	--	--	Cellular Component: nuclear envelope (GO:0005635);; Cellular Component: cytoplasm (GO:0005737);; Biological Process: protein import into nucleus (GO:0006606);; Molecular Function: Ran GTPase binding (GO:0008536);;	--	--	[U]	Intracellular trafficking, secretion, and vesicular transport	Nuclear transport factor 2 (NTF2) domain	Nuclear transport factor 2 GN=NTF2 OS=Arabidopsis thaliana (Mouse-ear cress) PE=1 SV=1	U	Intracellular trafficking, secretion, and vesicular transport	PREDICTED: nuclear transport factor 2-like [Eucalyptus grandis]
	F01_transcript_68137	81.7175	63.6657	45.614	62.2345	96.1219	79.1782	193.536	193.536	193.536	67.2207	67.2207	--	--	Molecular Function: calcium ion binding (GO:0005509);; Cellular Component: endoplasmic reticulum lumen (GO:0005788);; Biological Process: protein folding (GO:0006457);; Molecular Function: carbohydrate binding (GO:0030246);; Molecular Function: unfolded protein binding (GO:0051082);;	K08057|0|cam:101511865|K08057 calreticulin | (RefSeq) calreticulin	ko04141:Protein processing in endoplasmic reticulum;ko04145:Phagosome	[O]	Posttranslational modification, protein turnover, chaperones	Calreticulin family	Calreticulin (Precursor) OS=Ricinus communis (Castor bean) PE=2 SV=1	O	Posttranslational modification, protein turnover, chaperones	PREDICTED: calreticulin-like [Eucalyptus grandis]
	F01_transcript_99451	123.42	114.87	106.32	141.636	97.8934	119.765	192.937	192.937	192.937	105.328	105.328	[O]	Posttranslational modification, protein turnover, chaperones	Molecular Function: ATP binding (GO:0005524);; Cellular Component: cell wall (GO:0005618);; Cellular Component: cytosol (GO:0005829);; Biological Process: protein folding (GO:0006457);; Cellular Component: integral component of membrane (GO:0016021);; Cellular Component: anchored component of plasma membrane (GO:0046658);; Molecular Function: unfolded protein binding (GO:0051082);;	K09494|1.71565e-163|pmum:103321172|K09494 T-complex protein 1 subunit beta | (RefSeq) T-complex protein 1 subunit beta	--	[O]	Posttranslational modification, protein turnover, chaperones	TCP-1/cpn60 chaperonin family;; TCP-1/cpn60 chaperonin family;; TCP-1/cpn60 chaperonin family	T-complex protein 1 subunit beta {ECO:0000303|PubMed:11599560} OS=Arabidopsis thaliana (Mouse-ear cress) PE=1 SV=1	O	Posttranslational modification, protein turnover, chaperones	PREDICTED: T-complex protein 1 subunit beta-like [Eucalyptus grandis]
	F01_transcript_100211	91.3776	40.0488	51.0406	59.8612	90.0892	117.827	211.497	107.204	257.753	89.891	109.646	--	--	Molecular Function: calcium ion binding (GO:0005509);; Cellular Component: endoplasmic reticulum lumen (GO:0005788);; Biological Process: protein folding (GO:0006457);; Molecular Function: carbohydrate binding (GO:0030246);; Molecular Function: unfolded protein binding (GO:0051082);;	K08057|0|eus:EUTSA_v10023481mg|K08057 calreticulin | (RefSeq) hypothetical protein	ko04141:Protein processing in endoplasmic reticulum;ko04145:Phagosome	[O]	Posttranslational modification, protein turnover, chaperones	Calreticulin family	Calreticulin (Precursor) OS=Ricinus communis (Castor bean) PE=2 SV=1	O	Posttranslational modification, protein turnover, chaperones	PREDICTED: calreticulin-like [Eucalyptus grandis]
	F01_transcript_32361	111.209	155.748	103.077	133.187	107.473	255.098	114.725	188.72	272.017	99.5604	230.152	[CP]	--	Molecular Function: magnesium ion binding (GO:0000287);; Molecular Function: inorganic diphosphatase activity (GO:0004427);; Cellular Component: cytosol (GO:0005829);; Biological Process: phosphate-containing compound metabolic process (GO:0006796);;	K01507|8.77786e-146|tcc:TCM_021993|K01507 inorganic pyrophosphatase [EC:3.6.1.1] | (RefSeq) Pyrophosphorylase 4	ko00190:Oxidative phosphorylation	[C]	Energy production and conversion	Inorganic pyrophosphatase	Soluble inorganic pyrophosphatase GN=PPA OS=Solanum tuberosum (Potato) PE=2 SV=1	C	Energy production and conversion	PREDICTED: soluble inorganic pyrophosphatase-like [Eucalyptus grandis]
	F01_transcript_81372	92.0676	108.583	125.098	185.046	92.1977	138.622	188.166	188.166	188.166	127.568	127.568	--	--	Cellular Component: membrane (GO:0016020);; Molecular Function: organic cyclic compound binding (GO:0097159);; Molecular Function: heterocyclic compound binding (GO:1901363);;	K14314|0|pper:PRUPE_ppa000075mg|K14314 nuclear pore complex protein Nup210 | (RefSeq) hypothetical protein	ko03013:RNA transport	[YU]	--	Bacterial Ig-like domain (group 2)	Nuclear pore complex protein GP210 {ECO:0000303|PubMed:21189294} (Precursor) OS=Arabidopsis thaliana (Mouse-ear cress) PE=1 SV=1	U	Intracellular trafficking, secretion, and vesicular transport	PREDICTED: nuclear pore membrane glycoprotein 210-like [Eucalyptus grandis]
	F01_transcript_26006	75.8578	106.985	138.113	141.912	117.525	129.718	185.172	185.172	185.172	99.3873	99.3873	--	--	Cellular Component: U5 snRNP (GO:0005682);;	K13099|1.41907e-129|tcc:TCM_007490|K13099 CD2 antigen cytoplasmic tail-binding protein 2 | (RefSeq) CD2-binding protein-related, putative	--	[R]	General function prediction only	--	--	S	Function unknown	PREDICTED: CD2 antigen cytoplasmic tail-binding protein 2 [Eucalyptus grandis]
Most highly abundence proteins in E. urograndis at 11 years old	F01_transcript_1	213.288	170.131	197.104	86.5417	112.095	99.3186	88.2453	88.2453	88.2453	295.4	295.4	--	--	Molecular Function: ubiquitin-protein transferase activity (GO:0004842);; Biological Process: protein ubiquitination (GO:0016567);; Molecular Function: ligase activity (GO:0016874);;	K10592|0|vvi:100255704|K10592 E3 ubiquitin-protein ligase HUWE1 [EC:2.3.2.26] | (RefSeq) E3 ubiquitin-protein ligase UPL2	ko04120:Ubiquitin mediated proteolysis	[OK]	--	Domain of Unknown Function (DUF913);; Domain of Unknown Function (DUF908);; UBA/TS-N domain;; HECT-domain (ubiquitin-transferase)	E3 ubiquitin-protein ligase UPL2 GN=UPL2 OS=Arabidopsis thaliana (Mouse-ear cress) PE=1 SV=3	O	Posttranslational modification, protein turnover, chaperones	PREDICTED: E3 ubiquitin-protein ligase UPL2-like [Eucalyptus grandis]
	F01_transcript_6599	121.159	115.806	110.453	105.793	120.403	113.098	89.6725	89.6725	89.6725	234.005	234.005	[T]	Signal transduction mechanisms	Biological Process: activation of MAPKK activity (GO:0000186);; Molecular Function: MAP kinase kinase kinase activity (GO:0004709);; Molecular Function: ATP binding (GO:0005524);; Cellular Component: intracellular (GO:0005622);; Cellular Component: integral component of membrane (GO:0016021);;	--	--	--	--	Carbohydrate-binding protein of the ER;; Protein kinase domain;; Protein tyrosine kinase;; Leucine Rich repeats (2 copies);; Leucine rich repeat;; Di-glucose binding within endoplasmic reticulum	Probable LRR receptor-like serine/threonine-protein kinase At5g48740 (Precursor) GN=At5g48740 OS=Arabidopsis thaliana (Mouse-ear cress) PE=2 SV=1	T	Signal transduction mechanisms	hypothetical protein EUGRSUZ_H00798 [Eucalyptus grandis]
	F01_transcript_77344	81.7778	83.0208	50.7778	51.2222	103	120.521	87.1111	100.208	137.188	303.778	84.1667	[O]	Posttranslational modification, protein turnover, chaperones	Molecular Function: ATP binding (GO:0005524);; Cellular Component: mitochondrion (GO:0005739);; Biological Process: protein folding (GO:0006457);; Molecular Function: unfolded protein binding (GO:0051082);;	K03283|0|vvi:100250929|K03283 heat shock 70kDa protein 1/8 | (RefSeq) heat shock 70 kDa protein, mitochondrial	--	[O]	Posttranslational modification, protein turnover, chaperones	Hsp70 protein;; MreB/Mbl protein;; FGGY family of carbohydrate kinases, C-terminal domain	Heat shock 70 kDa protein, mitochondrial (Precursor) OS=Phaseolus vulgaris (Kidney bean) PE=1 SV=1	O	Posttranslational modification, protein turnover, chaperones	PREDICTED: heat shock 70 kDa protein, mitochondrial-like [Eucalyptus grandis]
	F01_transcript_99365	94.1576	140.284	130.707	204.212	110.462	140	136.549	144.965	118.865	175.136	206.95	--	--	Cellular Component: cytosol (GO:0005829);; Molecular Function: protein xylosyltransferase activity (GO:0030158);; Molecular Function: protein-disulfide reductase activity (GO:0047134);; Biological Process: oxidation-reduction process (GO:0055114);;	--	--	[S]	Function unknown	Eukaryotic protein of unknown function (DUF953)	Thioredoxin-like protein Clot GN=At5g42850 OS=Arabidopsis thaliana (Mouse-ear cress) PE=2 SV=1	O	Posttranslational modification, protein turnover, chaperones	PREDICTED: thioredoxin-like protein Clot [Eucalyptus grandis]
	F01_transcript_32516	92.3349	75.8439	81.1321	143.868	108.608	65.9283	137.028	74.4726	117.616	162.618	199.051	[G]	Carbohydrate transport and metabolism	Cellular Component: protein storage vacuole (GO:0000326);; Cellular Component: Golgi apparatus (GO:0005794);; Cellular Component: integral component of plasma membrane (GO:0005887);; Biological Process: water transport (GO:0006833);; Cellular Component: plant-type cell wall (GO:0009505);; Cellular Component: plasmodesma (GO:0009506);; Cellular Component: plant-type vacuole membrane (GO:0009705);;…	K09873|9.5571e-133|mdm:103405434|K09873 aquaporin TIP | (RefSeq) aquaporin TIP2-1	--	[G]	Carbohydrate transport and metabolism	Major intrinsic protein	Aquaporin TIP2-1, N-terminally processed GN=TIP2-1 OS=Arabidopsis thaliana (Mouse-ear cress) PE=1 SV=2	G	Carbohydrate transport and metabolism	PREDICTED: aquaporin TIP2-1 [Eucalyptus grandis]
	F01_transcript_38085	139.731	125.681	157.576	310.269	87.3737	127.237	213.3	140.597	102.983	170.202	181.712	--	--	Cellular Component: mitochondrial respiratory chain complex I (GO:0005747);; Cellular Component: vacuolar membrane (GO:0005774);;	--	--	--	--	--	--	S	Function unknown	PREDICTED: uncharacterized protein LOC104445840 [Eucalyptus grandis]
	F01_transcript_36488	47.6581	64.04	52.2248	194.848	120.609	160.155	114.052	75.0277	106.659	190.281	160.044	[O]	Posttranslational modification, protein turnover, chaperones	--	K13993|3.97511e-79|mtr:MTR_4g091590|K13993 HSP20 family protein | (RefSeq) 17.6 kDa class I heat shock protein	ko04141:Protein processing in endoplasmic reticulum	[O]	Posttranslational modification, protein turnover, chaperones	Hsp20/alpha crystallin family	18.5 kDa class I heat shock protein GN=HSP18.5-C OS=Glycine max (Soybean) PE=3 SV=1	O	Posttranslational modification, protein turnover, chaperones	PREDICTED: 18.1 kDa class I heat shock protein-like [Eucalyptus grandis]
	F01_transcript_44354	124	95.9783	117.161	156.516	121.29	106.087	124.774	68.6957	93.587	159.355	187.826	--	--	--	K02152|1.6717e-55|pop:POPTR_0008s04010g|K02152 V-type H+-transporting ATPase subunit G | (RefSeq) POPTRDRAFT_655913; Vacuolar ATP synthase subunit G 2 family protein	ko00190:Oxidative phosphorylation;ko04145:Phagosome	[C]	Energy production and conversion	Vacuolar (H+)-ATPase G subunit	V-type proton ATPase subunit G GN=VATG OS=Citrus limon (Lemon) PE=3 SV=1	C	Energy production and conversion	PREDICTED: V-type proton ATPase subunit G 1-like [Eucalyptus grandis]
	F01_transcript_91585	122.008	138.235	140.44	205.64	92.9849	140.508	166.437	116.444	96.5241	135.351	210.428	--	--	Cellular Component: nucleus (GO:0005634);; Cellular Component: mitochondrial respiratory chain complex II, succinate dehydrogenase complex (ubiquinone) (GO:0005749);; Biological Process: response to cytokinin (GO:0009735);;	--	--	--	--	Domain of unknown function (DUF4370);; Domain of unknown function (DUF4370)	Uncharacterized protein At1g47420, mitochondrial (Precursor) GN=At1g47420 OS=Arabidopsis thaliana (Mouse-ear cress) PE=1 SV=1	S	Function unknown	PREDICTED: uncharacterized protein At1g47420, mitochondrial [Eucalyptus grandis]
	F01_transcript_35715	68.8971	66.6259	56.8773	130.235	118.34	179.584	217.348	117.604	102.445	175.589	167.237	[O]	Posttranslational modification, protein turnover, chaperones	--	K13993|2.55936e-73|tcc:TCM_041856|K13993 HSP20 family protein | (RefSeq) HSP20-like chaperones superfamily protein	ko04141:Protein processing in endoplasmic reticulum	[O]	Posttranslational modification, protein turnover, chaperones	Hsp20/alpha crystallin family	17.4 kDa class I heat shock protein GN=HSP17.4A OS=Arabidopsis thaliana (Mouse-ear cress) PE=2 SV=2	O	Posttranslational modification, protein turnover, chaperones	PREDICTED: 17.4 kDa class I heat shock protein-like [Eucalyptus grandis]
	F01_transcript_118086	97.2	114.128	124.933	199.067	106.267	114.742	173.333	93.8575	105.16	132.533	209.214	[O]	Posttranslational modification, protein turnover, chaperones	Molecular Function: threonine-type endopeptidase activity (GO:0004298);; Cellular Component: nucleus (GO:0005634);; Cellular Component: cytoplasm (GO:0005737);; Cellular Component: proteasome core complex (GO:0005839);; Biological Process: proteolysis involved in cellular protein catabolic process (GO:0051603);;	K02735|5.35512e-137|csv:101218171|K02735 20S proteasome subunit beta 3 [EC:3.4.25.1] | (RefSeq) proteasome subunit beta type-3-A	ko03050:Proteasome	[O]	Posttranslational modification, protein turnover, chaperones	Proteasome subunit	Proteasome subunit beta type-3-A GN=F8K7.15 OS=Arabidopsis thaliana (Mouse-ear cress) PE=1 SV=2	O	Posttranslational modification, protein turnover, chaperones	hypothetical protein EUGRSUZ_F04339 [Eucalyptus grandis]
	F01_transcript_34796	137.586	141.221	144.856	173.251	96.1591	134.705	138.134	138.134	138.134	170.096	170.096	--	--	Biological Process: sulfate assimilation (GO:0000103);; Cellular Component: cytoplasm (GO:0005737);; Biological Process: protein folding (GO:0006457);; Molecular Function: protein disulfide oxidoreductase activity (GO:0015035);; Molecular Function: oxidoreductase activity, acting on a sulfur group of donors, disulfide as acceptor (GO:0016671);; Biological Process: cellular response to oxidative s…	--	--	[O]	Posttranslational modification, protein turnover, chaperones	PITH domain	PITH domain-containing protein At3g04780 GN=At3g04780 OS=Arabidopsis thaliana (Mouse-ear cress) PE=1 SV=2	O	Posttranslational modification, protein turnover, chaperones	hypothetical protein EUGRSUZ_B02113 [Eucalyptus grandis]
	F01_transcript_35677	114.863	115.296	115.729	260.75	88.7446	174.747	161.183	161.183	161.183	168.687	168.687	--	--	Molecular Function: DNA binding (GO:0003677);;	--	--	--	--	Remorin, C-terminal region;; Remorin, N-terminal region	Remorin OS=Solanum tuberosum (Potato) PE=1 SV=1	S	Function unknown	PREDICTED: remorin-like [Eucalyptus grandis]
	F01_transcript_113383	119.64	107.168	181.559	223.088	123.538	110.173	149.475	98.0347	98.7283	152.324	179.538	--	--	Cellular Component: integral component of membrane (GO:0016021);;	--	--	--	--	Protein of unknown function (DUF1138)	--	S	Function unknown	PREDICTED: uncharacterized protein LOC104421508 [Eucalyptus grandis]
	F01_transcript_91779	113.018	77.7985	105.473	219.083	108.58	53.9179	225.592	95.056	65.2052	163.905	167.631	[Q]	Secondary metabolites biosynthesis, transport and catabolism	Molecular Function: alcohol dehydrogenase (NADP+) activity (GO:0008106);; Biological Process: oxidation-reduction process (GO:0055114);;	--	--	[R]	General function prediction only	Aldo/keto reductase family	Aldo-keto reductase family 4 member C9 GN=AKR4C9 OS=Arabidopsis thaliana (Mouse-ear cress) PE=1 SV=1	S	Function unknown	PREDICTED: aldo-keto reductase family 4 member C9-like [Eucalyptus grandis]
	F01_transcript_34324	91.6309	97.541	81.1159	126.288	103.433	110.187	107.94	101.288	103.747	140.773	189.813	[O]	Posttranslational modification, protein turnover, chaperones	Molecular Function: glutathione transferase activity (GO:0004364);; Cellular Component: cytoplasm (GO:0005737);; Biological Process: glutathione metabolic process (GO:0006749);; Molecular Function: glutathione dehydrogenase (ascorbate) activity (GO:0045174);; Biological Process: oxidation-reduction process (GO:0055114);; Biological Process: cellular oxidant detoxification (GO:0098869);;	--	--	[P]	Inorganic ion transport and metabolism	Glutathione S-transferase, N-terminal domain;; Glutathione S-transferase, N-terminal domain;; Glutathione S-transferase, N-terminal domain;; Glutathione S-transferase, C-terminal domain;; Glutathione S-transferase, C-terminal domain;; Glutaredoxin	Glutathione S-transferase DHAR2 GN=F22H5.1 OS=Arabidopsis thaliana (Mouse-ear cress) PE=1 SV=1	O	Posttranslational modification, protein turnover, chaperones	PREDICTED: glutathione S-transferase DHAR2-like isoform X2 [Eucalyptus grandis]
	F01_transcript_32361	111.209	155.748	103.077	133.187	107.473	255.098	114.725	188.72	272.017	99.5604	230.152	[CP]	--	Molecular Function: magnesium ion binding (GO:0000287);; Molecular Function: inorganic diphosphatase activity (GO:0004427);; Cellular Component: cytosol (GO:0005829);; Biological Process: phosphate-containing compound metabolic process (GO:0006796);;	K01507|8.77786e-146|tcc:TCM_021993|K01507 inorganic pyrophosphatase [EC:3.6.1.1] | (RefSeq) Pyrophosphorylase 4	ko00190:Oxidative phosphorylation	[C]	Energy production and conversion	Inorganic pyrophosphatase	Soluble inorganic pyrophosphatase GN=PPA OS=Solanum tuberosum (Potato) PE=2 SV=1	C	Energy production and conversion	PREDICTED: soluble inorganic pyrophosphatase-like [Eucalyptus grandis]
	F01_transcript_116266	119.61	119.61	119.61	102.167	102.167	102.167	81.9068	85.6988	78.1148	164.464	164.464	--	--	Molecular Function: DNA binding (GO:0003677);; Molecular Function: transcription factor activity, sequence-specific DNA binding (GO:0003700);; Biological Process: regulation of transcription, DNA-templated (GO:0006355);; Cellular Component: CCAAT-binding factor complex (GO:0016602);;	K08064|1.34749e-47|cic:CICLE_v10005144mg|K08064 nuclear transcription factor Y, alpha | (RefSeq) hypothetical protein	--	[K]	Transcription	CCAAT-binding transcription factor (CBF-B/NF-YA) subunit B	Nuclear transcription factor Y subunit A-7 GN=NFYA7 OS=Arabidopsis thaliana (Mouse-ear cress) PE=2 SV=1	K	Transcription	PREDICTED: nuclear transcription factor Y subunit A-7-like [Eucalyptus grandis]
	F01_transcript_64254	98.9537	120.838	124.813	242.152	101.794	113.44	231.839	117.263	107.645	146.637	180.641	[C]	Energy production and conversion	Molecular Function: succinate-CoA ligase (ADP-forming) activity (GO:0004775);; Molecular Function: succinate-CoA ligase (GDP-forming) activity (GO:0004776);; Cellular Component: mitochondrial matrix (GO:0005759);; Cellular Component: cytosol (GO:0005829);; Biological Process: tricarboxylic acid cycle (GO:0006099);; Biological Process: succinyl-CoA metabolic process (GO:0006104);; Biological Proce…	K01899|4.35048e-156|gmx:100815484|K01899 succinyl-CoA synthetase alpha subunit [EC:6.2.1.4 6.2.1.5] | (RefSeq) probable succinyl-CoA ligase [ADP-forming] subunit alpha, mitochondrial	ko00020:Citrate cycle (TCA cycle);ko00640:Propanoate metabolism;ko01200:Carbon metabolism	[C]	Energy production and conversion	CoA binding domain;; CoA-ligase	Probable succinyl-CoA ligase [ADP-forming] subunit alpha, mitochondrial (Precursor) OS=Oryza sativa subsp. japonica (Rice) PE=1 SV=1	C	Energy production and conversion	PREDICTED: probable succinyl-CoA ligase [ADP-forming] subunit alpha, mitochondrial [Eucalyptus grandis]
	F01_transcript_38626	104.167	138.232	111.806	164.352	93.5185	123.661	102.315	69.863	123.288	134.028	192.154	--	--	--	K19765|1.46755e-35|tcc:TCM_046983|K19765 heat shock factor-binding protein 1 | (RefSeq) Heat shock factor binding protein	--	[KO]	--	Heat shock factor binding protein 1	--	S	Function unknown	PREDICTED: heat shock factor-binding protein 1 [Eucalyptus grandis]

## Sheet: Supplementary Table 6
Supplementary Table 6. GO enrichment analysis of all DEPs.
GO.ID	GO category	Term	Number of DAPs in comparable groups
			UG3Y vs. UG6Y	UG3Y vs. UG9Y	UG3Y vs. UG11Y	UG6Y vs. UG9Y	UG6Y vs. UG11Y	UG9Y vs. UG11Y
GO:0000015	Cellular Component	phosphopyruvate hydratase complex	0	2	0	1	0	0
GO:0000023	Biological Process	maltose metabolic process	0	1	0	0	0	0
GO:0000027	Biological Process	ribosomal large subunit assembly	0	0	0	1	0	0
GO:0000028	Biological Process	ribosomal small subunit assembly	0	2	0	1	0	0
GO:0000038	Biological Process	very long-chain fatty acid metabolic process	0	1	0	1	0	0
GO:0000049	Molecular Function	tRNA binding	0	1	0	1	0	0
GO:0000082	Biological Process	G1/S transition of mitotic cell cycle	0	1	0	0	0	0
GO:0000139	Cellular Component	Golgi membrane	2	0	2	0	0	0
GO:0000149	Molecular Function	SNARE binding	2	0	0	0	0	0
GO:0000154	Biological Process	rRNA modification	0	0	0	1	0	0
GO:0000159	Cellular Component	protein phosphatase type 2A complex	0	1	0	1	0	0
GO:0000162	Biological Process	tryptophan biosynthetic process	0	2	0	1	0	1
GO:0000164	Cellular Component	protein phosphatase type 1 complex	0	2	0	1	0	0
GO:0000165	Biological Process	MAPK cascade	0	1	0	1	0	0
GO:0000166	Molecular Function	nucleotide binding	1	6	3	4	0	2
GO:0000226	Biological Process	microtubule cytoskeleton organization	1	0	0	0	0	0
GO:0000275	Cellular Component	mitochondrial proton-transporting ATP synthase complex, catalytic core F (1)	0	2	0	1	0	1
GO:0000287	Molecular Function	magnesium ion binding	0	7	1	6	0	1
GO:0000290	Biological Process	deadenylation-dependent decapping of nuclear-transcribed mRNA	0	1	0	0	0	0
GO:0000325	Cellular Component	plant-type vacuole	0	1	0	0	0	0
GO:0000339	Molecular Function	RNA cap binding	0	1	0	0	0	0
GO:0000387	Biological Process	spliceosomal snRNP assembly	0	2	0	1	0	0
GO:0000398	Biological Process	mRNA splicing, via spliceosome	0	1	0	0	0	0
GO:0000413	Biological Process	protein peptidyl-prolyl isomerization	0	2	1	0	0	0
GO:0000462	Biological Process	maturation of SSU-rRNA from tricistronic rRNA transcript (SSU-rRNA, 5.8S rRNA, LSU-rRNA)	0	1	0	0	0	1
GO:0000783	Cellular Component	nuclear telomere cap complex	0	1	0	1	0	0
GO:0000786	Cellular Component	nucleosome	0	0	1	0	0	0
GO:0000790	Cellular Component	nuclear chromatin	0	0	1	0	0	0
GO:0000902	Biological Process	cell morphogenesis	0	0	0	1	0	0
GO:0000911	Biological Process	cytokinesis by cell plate formation	0	0	0	1	0	0
GO:0000932	Cellular Component	P-body	0	1	0	0	0	0
GO:0000977	Molecular Function	RNA polymerase II regulatory region sequence-specific DNA binding	0	0	0	1	0	0
GO:0001055	Molecular Function	RNA polymerase II activity	0	1	0	1	0	0
GO:0001104	Molecular Function	RNA polymerase II transcription cofactor activity	0	2	0	1	0	0
GO:0001731	Biological Process	formation of translation preinitiation complex	0	1	0	1	0	0
GO:0002181	Biological Process	cytoplasmic translation	1	3	0	1	0	2
GO:0003676	Molecular Function	nucleic acid binding	0	3	2	1	0	1
GO:0003677	Molecular Function	DNA binding	1	3	2	2	0	0
GO:0003684	Molecular Function	damaged DNA binding	0	1	0	0	0	0
GO:0003691	Molecular Function	double-stranded telomeric DNA binding	0	1	0	1	0	0
GO:0003697	Molecular Function	single-stranded DNA binding	0	1	0	0	0	1
GO:0003700	Molecular Function	DNA binding transcription factor activity	0	0	0	1	0	0
GO:0003713	Molecular Function	transcription coactivator activity	1	1	0	0	0	0
GO:0003723	Molecular Function	RNA binding	1	4	1	2	1	3
GO:0003729	Molecular Function	mRNA binding	0	0	0	0	0	1
GO:0003735	Molecular Function	structural constituent of ribosome	1	14	2	4	2	10
GO:0003743	Molecular Function	translation initiation factor activity	0	3	1	2	1	0
GO:0003746	Molecular Function	translation elongation factor activity	0	1	0	2	0	0
GO:0003755	Molecular Function	peptidyl-prolyl cis-trans isomerase activity	0	2	1	0	0	0
GO:0003756	Molecular Function	protein disulfide isomerase activity	0	2	0	0	0	0
GO:0003774	Molecular Function	motor activity	2	0	0	0	0	0
GO:0003777	Molecular Function	microtubule motor activity	0	0	1	0	0	1
GO:0003779	Molecular Function	actin binding	2	0	0	0	0	0
GO:0003824	Molecular Function	catalytic activity	1	1	0	0	0	0
GO:0003838	Molecular Function	sterol 24-C-methyltransferase activity	1	1	1	0	0	0
GO:0003844	Molecular Function	1,4-alpha-glucan branching enzyme activity	0	1	0	0	0	0
GO:0003852	Molecular Function	2-isopropylmalate synthase activity	0	0	0	1	0	0
GO:0003855	Molecular Function	3-dehydroquinate dehydratase activity	0	0	0	1	0	0
GO:0003865	Molecular Function	3-oxo-5-alpha-steroid 4-dehydrogenase activity	0	1	0	0	0	0
GO:0003871	Molecular Function	5-methyltetrahydropteroyltriglutamate-homocysteine S-methyltransferase activity	0	0	0	1	0	0
GO:0003872	Molecular Function	6-phosphofructokinase activity	2	1	0	0	0	0
GO:0003924	Molecular Function	GTPase activity	2	5	0	4	0	1
GO:0003948	Molecular Function	N4-(beta-N-acetylglucosaminyl)-L-asparaginase activity	0	1	0	0	0	0
GO:0003959	Molecular Function	NADPH dehydrogenase activity	0	1	0	0	0	0
GO:0003960	Molecular Function	NADPH	0	3	0	0	0	0
GO:0003984	Molecular Function	acetolactate synthase activity	0	0	1	1	0	0
GO:0003988	Molecular Function	acetyl-CoA C-acyltransferase activity	0	1	0	1	0	0
GO:0004013	Molecular Function	adenosylhomocysteinase activity	0	2	0	0	0	1
GO:0004019	Molecular Function	adenylosuccinate synthase activity	0	0	0	1	0	0
GO:0004022	Molecular Function	alcohol dehydrogenase (NAD) activity	1	2	0	0	0	0
GO:0004028	Molecular Function	3-chloroallyl aldehyde dehydrogenase activity	0	2	0	1	0	0
GO:0004029	Molecular Function	aldehyde dehydrogenase (NAD) activity	0	2	0	1	0	0
GO:0004030	Molecular Function	aldehyde dehydrogenase [NAD(P)+] activity	0	1	0	1	0	0
GO:0004048	Molecular Function	anthranilate phosphoribosyltransferase activity	0	1	0	1	0	0
GO:0004057	Molecular Function	arginyltransferase activity	1	0	0	0	0	0
GO:0004069	Molecular Function	L-aspartate	0	1	0	0	0	0
GO:0004072	Molecular Function	aspartate kinase activity	0	1	0	1	0	0
GO:0004089	Molecular Function	carbonate dehydratase activity	0	1	0	0	0	0
GO:0004095	Molecular Function	carnitine O-palmitoyltransferase activity	0	0	0	1	0	0
GO:0004108	Molecular Function	citrate (Si)-synthase activity	0	0	0	1	0	0
GO:0004128	Molecular Function	cytochrome-b5 reductase activity, acting on NAD(P)H	0	2	0	1	0	1
GO:0004157	Molecular Function	dihydropyrimidinase activity	0	1	1	0	0	0
GO:0004175	Molecular Function	endopeptidase activity	0	0	0	1	0	0
GO:0004176	Molecular Function	ATP-dependent peptidase activity	0	1	0	0	0	0
GO:0004185	Molecular Function	serine-type carboxypeptidase activity	0	2	1	0	0	0
GO:0004190	Molecular Function	aspartic-type endopeptidase activity	1	2	1	1	0	0
GO:0004197	Molecular Function	cysteine-type endopeptidase activity	0	1	1	0	0	0
GO:0004222	Molecular Function	metalloendopeptidase activity	0	3	0	2	0	0
GO:0004252	Molecular Function	serine-type endopeptidase activity	3	4	3	1	0	1
GO:0004298	Molecular Function	threonine-type endopeptidase activity	0	1	0	0	0	0
GO:0004306	Molecular Function	ethanolamine-phosphate cytidylyltransferase activity	0	1	0	0	0	0
GO:0004318	Molecular Function	enoyl-[acyl-carrier-protein] reductase 9(NADH) activity	0	1	0	0	0	0
GO:0004335	Molecular Function	galactokinase activity	0	1	0	1	0	0
GO:0004356	Molecular Function	glutamate-ammonia ligase activity	0	0	0	0	0	1
GO:0004364	Molecular Function	glutathione transferase activity	1	1	0	1	0	1
GO:0004365	Molecular Function	glyceraldehyde-3-phosphate dehydrogenase (NAD+) (phosphorylating) activity	1	0	0	0	0	0
GO:0004371	Molecular Function	glycerone kinase activity	0	0	0	0	0	1
GO:0004412	Molecular Function	homoserine dehydrogenase activity	0	1	0	1	0	0
GO:0004416	Molecular Function	hydroxyacylglutathione hydrolase activity	0	0	1	0	0	0
GO:0004427	Molecular Function	inorganic diphosphatase activity	0	2	0	1	0	1
GO:0004471	Molecular Function	malate dehydrogenase (decarboxylating) (NAD+) activity	0	2	0	0	0	0
GO:0004475	Molecular Function	mannose-1-phosphate guanylyltransferase activity	0	0	0	1	0	0
GO:0004478	Molecular Function	methionine adenosyltransferase activity	0	1	2	0	0	0
GO:0004490	Molecular Function	methylglutaconyl-CoA hydratase activity	0	1	0	0	0	1
GO:0004497	Molecular Function	monooxygenase activity	0	1	1	0	0	0
GO:0004553	Molecular Function	hydrolase activity, hydrolyzing O-glycosyl compounds	0	2	2	0	0	0
GO:0004558	Molecular Function	alpha-1,4-glucosidase activity	0	1	0	0	0	0
GO:0004565	Molecular Function	beta-galactosidase activity	0	0	1	0	0	0
GO:0004568	Molecular Function	chitinase activity	0	1	0	0	0	0
GO:0004601	Molecular Function	peroxidase activity	0	4	1	0	0	0
GO:0004614	Molecular Function	phosphoglucomutase activity	0	2	0	1	0	0
GO:0004615	Molecular Function	phosphomannomutase activity	0	1	0	0	0	0
GO:0004616	Molecular Function	phosphogluconate dehydrogenase (decarboxylating) activity	0	2	0	0	0	0
GO:0004617	Molecular Function	phosphoglycerate dehydrogenase activity	0	0	1	0	0	0
GO:0004618	Molecular Function	phosphoglycerate kinase activity	0	0	0	1	0	0
GO:0004619	Molecular Function	phosphoglycerate mutase activity	0	3	1	2	0	0
GO:0004630	Molecular Function	phospholipase D activity	0	1	0	0	0	0
GO:0004634	Molecular Function	phosphopyruvate hydratase activity	0	2	0	1	0	0
GO:0004642	Molecular Function	phosphoribosylformylglycinamidine synthase activity	0	1	0	0	0	0
GO:0004650	Molecular Function	polygalacturonase activity	0	1	1	1	0	1
GO:0004672	Molecular Function	protein kinase activity	0	0	0	1	0	0
GO:0004674	Molecular Function	protein serine/threonine kinase activity	5	4	2	1	1	1
GO:0004707	Molecular Function	MAP kinase activity	0	1	0	1	0	0
GO:0004714	Molecular Function	transmembrane receptor protein tyrosine kinase activity	1	0	0	0	1	0
GO:0004715	Molecular Function	non-membrane spanning protein tyrosine kinase activity	2	2	1	0	0	1
GO:0004719	Molecular Function	protein-L-isoaspartate (D-aspartate) O-methyltransferase activity	0	0	0	0	0	1
GO:0004725	Molecular Function	protein tyrosine phosphatase activity	0	0	0	0	0	1
GO:0004737	Molecular Function	pyruvate decarboxylase activity	0	1	0	1	0	0
GO:0004739	Molecular Function	pyruvate dehydrogenase (acetyl-transferring) activity	0	1	0	0	0	0
GO:0004743	Molecular Function	pyruvate kinase activity	0	1	0	2	0	1
GO:0004750	Molecular Function	ribulose-phosphate 3-epimerase activity	0	0	0	1	0	0
GO:0004764	Molecular Function	shikimate 3-dehydrogenase (NADP+) activity	0	0	0	1	0	0
GO:0004775	Molecular Function	succinate-CoA ligase (ADP-forming) activity	1	0	0	0	0	0
GO:0004784	Molecular Function	superoxide dismutase activity	0	1	0	0	0	0
GO:0004791	Molecular Function	thioredoxin-disulfide reductase activity	0	1	0	0	0	0
GO:0004802	Molecular Function	transketolase activity	0	1	0	0	0	0
GO:0004813	Molecular Function	alanine-tRNA ligase activity	0	0	0	1	0	0
GO:0004826	Molecular Function	phenylalanine-tRNA ligase activity	0	1	0	0	0	0
GO:0004834	Molecular Function	tryptophan synthase activity	0	1	0	0	0	1
GO:0004839	Molecular Function	ubiquitin activating enzyme activity	0	0	0	1	0	0
GO:0004842	Molecular Function	ubiquitin-protein transferase activity	0	0	0	1	0	0
GO:0004864	Molecular Function	protein phosphatase inhibitor activity	0	2	0	1	0	0
GO:0004865	Molecular Function	protein serine/threonine phosphatase inhibitor activity	0	1	0	0	0	0
GO:0004869	Molecular Function	cysteine-type endopeptidase inhibitor activity	1	0	1	0	0	0
GO:0004871	Molecular Function	signal transducer activity	0	0	0	0	0	1
GO:0004872	Molecular Function	receptor activity	0	1	0	0	0	0
GO:0005085	Molecular Function	guanyl-nucleotide exchange factor activity	0	0	1	0	1	0
GO:0005096	Molecular Function	GTPase activator activity	1	1	0	0	0	0
GO:0005198	Molecular Function	structural molecule activity	1	0	0	0	0	0
GO:0005200	Molecular Function	structural constituent of cytoskeleton	0	2	0	2	0	0
GO:0005215	Molecular Function	transporter activity	1	1	0	0	0	0
GO:0005319	Molecular Function	lipid transporter activity	1	0	1	0	0	0
GO:0005471	Molecular Function	ATP	0	1	0	0	0	0
GO:0005484	Molecular Function	SNAP receptor activity	2	0	0	0	0	0
GO:0005487	Molecular Function	structural constituent of nuclear pore	0	1	1	0	1	1
GO:0005506	Molecular Function	iron ion binding	0	2	1	0	0	2
GO:0005507	Molecular Function	copper ion binding	0	7	0	0	0	1
GO:0005509	Molecular Function	calcium ion binding	0	7	1	1	0	0
GO:0005515	Molecular Function	protein binding	0	4	0	4	0	2
GO:0005524	Molecular Function	ATP binding	14	37	9	11	2	6
GO:0005525	Molecular Function	GTP binding	1	7	1	5	0	1
GO:0005543	Molecular Function	phospholipid binding	0	1	0	0	0	1
GO:0005544	Molecular Function	calcium-dependent phospholipid binding	0	3	0	0	0	0
GO:0005576	Cellular Component	extracellular region	0	2	2	2	0	1
GO:0005615	Cellular Component	extracellular space	0	1	1	0	0	0
GO:0005618	Cellular Component	cell wall	2	10	4	1	0	0
GO:0005622	Cellular Component	intracellular	0	3	0	0	0	0
GO:0005623	Cellular Component	cell	0	1	0	1	0	0
GO:0005634	Cellular Component	nucleus	3	11	0	5	0	0
GO:0005635	Cellular Component	nuclear envelope	0	1	1	2	0	0
GO:0005643	Cellular Component	nuclear pore	0	0	0	0	1	0
GO:0005665	Cellular Component	DNA-directed RNA polymerase II, core complex	0	1	0	1	0	0
GO:0005682	Cellular Component	U5 snRNP	0	2	0	1	0	0
GO:0005685	Cellular Component	U1 snRNP	0	2	0	1	0	0
GO:0005686	Cellular Component	U2 snRNP	0	2	0	1	0	0
GO:0005687	Cellular Component	U4 snRNP	0	1	0	1	0	0
GO:0005730	Cellular Component	nucleolus	1	4	1	0	0	1
GO:0005737	Cellular Component	cytoplasm	5	21	8	7	0	3
GO:0005739	Cellular Component	mitochondrion	0	14	3	5	0	3
GO:0005743	Cellular Component	mitochondrial inner membrane	0	3	0	1	0	0
GO:0005747	Cellular Component	mitochondrial respiratory chain complex I	1	2	0	0	0	2
GO:0005750	Cellular Component	mitochondrial respiratory chain complex III	0	1	0	1	0	0
GO:0005758	Cellular Component	mitochondrial intermembrane space	0	2	0	0	0	1
GO:0005759	Cellular Component	mitochondrial matrix	0	1	0	0	0	0
GO:0005762	Cellular Component	mitochondrial large ribosomal subunit	0	0	1	0	0	0
GO:0005764	Cellular Component	lysosome	0	1	1	0	0	0
GO:0005768	Cellular Component	endosome	3	6	4	0	1	0
GO:0005773	Cellular Component	vacuole	0	5	1	1	0	3
GO:0005774	Cellular Component	vacuolar membrane	3	15	4	2	1	2
GO:0005777	Cellular Component	peroxisome	0	4	0	1	0	0
GO:0005783	Cellular Component	endoplasmic reticulum	1	13	2	2	0	8
GO:0005787	Cellular Component	signal peptidase complex	0	1	0	0	0	2
GO:0005788	Cellular Component	endoplasmic reticulum lumen	0	3	1	0	0	1
GO:0005789	Cellular Component	endoplasmic reticulum membrane	0	2	0	1	0	0
GO:0005794	Cellular Component	Golgi apparatus	1	12	1	1	0	5
GO:0005801	Cellular Component	cis-Golgi network	0	0	0	0	0	1
GO:0005802	Cellular Component	trans-Golgi network	3	4	4	0	1	0
GO:0005813	Cellular Component	centrosome	0	1	0	0	0	0
GO:0005829	Cellular Component	cytosol	7	31	3	18	0	6
GO:0005834	Cellular Component	heterotrimeric G-protein complex	0	0	0	0	0	1
GO:0005840	Cellular Component	ribosome	0	0	0	1	0	0
GO:0005849	Cellular Component	mRNA cleavage factor complex	0	0	0	0	0	1
GO:0005850	Cellular Component	eukaryotic translation initiation factor 2 complex	0	0	0	1	0	0
GO:0005851	Cellular Component	eukaryotic translation initiation factor 2B complex	0	0	1	1	1	0
GO:0005852	Cellular Component	eukaryotic translation initiation factor 3 complex	0	1	0	0	0	0
GO:0005853	Cellular Component	eukaryotic translation elongation factor 1 complex	0	1	0	1	0	0
GO:0005871	Cellular Component	kinesin complex	0	0	1	0	0	1
GO:0005874	Cellular Component	microtubule	1	2	1	2	0	0
GO:0005886	Cellular Component	plasma membrane	5	25	5	6	0	4
GO:0005887	Cellular Component	integral component of plasma membrane	0	0	0	0	0	2
GO:0005975	Biological Process	carbohydrate metabolic process	0	4	3	1	0	2
GO:0005978	Biological Process	glycogen biosynthetic process	0	4	0	1	0	0
GO:0005980	Biological Process	glycogen catabolic process	0	2	0	0	0	0
GO:0006002	Biological Process	fructose 6-phosphate metabolic process	2	1	0	0	0	0
GO:0006006	Biological Process	glucose metabolic process	1	4	0	1	0	0
GO:0006007	Biological Process	glucose catabolic process	0	3	1	2	0	0
GO:0006012	Biological Process	galactose metabolic process	0	1	0	1	0	0
GO:0006032	Biological Process	chitin catabolic process	0	1	0	0	0	0
GO:0006071	Biological Process	glycerol metabolic process	0	0	0	0	0	1
GO:0006086	Biological Process	acetyl-CoA biosynthetic process from pyruvate	0	1	0	0	0	0
GO:0006096	Biological Process	glycolytic process	1	6	1	6	0	1
GO:0006098	Biological Process	pentose-phosphate shunt	0	2	0	0	0	0
GO:0006099	Biological Process	tricarboxylic acid cycle	0	1	0	1	0	0
GO:0006108	Biological Process	malate metabolic process	0	2	0	0	0	0
GO:0006122	Biological Process	mitochondrial electron transport, ubiquinol to cytochrome c	0	2	0	1	0	1
GO:0006123	Biological Process	mitochondrial electron transport, cytochrome c to oxygen	0	1	0	0	0	1
GO:0006189	Biological Process	'de novo' IMP biosynthetic process	0	1	0	0	0	0
GO:0006212	Biological Process	uracil catabolic process	0	1	1	0	0	0
GO:0006281	Biological Process	DNA repair	0	2	1	1	0	1
GO:0006334	Biological Process	nucleosome assembly	0	1	0	0	0	0
GO:0006342	Biological Process	chromatin silencing	0	0	1	0	0	0
GO:0006355	Biological Process	regulation of transcription, DNA-templated	0	3	0	1	0	2
GO:0006357	Biological Process	regulation of transcription by RNA polymerase II	0	2	0	2	0	0
GO:0006366	Biological Process	transcription by RNA polymerase II	0	1	0	1	0	0
GO:0006378	Biological Process	mRNA polyadenylation	0	0	0	0	0	1
GO:0006396	Biological Process	RNA processing	1	0	0	0	0	0
GO:0006397	Biological Process	mRNA processing	0	0	1	0	0	0
GO:0006400	Biological Process	tRNA modification	0	0	0	1	0	0
GO:0006405	Biological Process	RNA export from nucleus	0	1	0	0	0	0
GO:0006407	Biological Process	rRNA export from nucleus	0	1	0	0	0	0
GO:0006412	Biological Process	translation	0	10	1	3	2	8
GO:0006413	Biological Process	translational initiation	0	2	0	1	0	0
GO:0006414	Biological Process	translational elongation	0	1	0	1	0	0
GO:0006432	Biological Process	phenylalanyl-tRNA aminoacylation	0	1	0	0	0	0
GO:0006446	Biological Process	regulation of translational initiation	0	1	0	1	0	0
GO:0006457	Biological Process	protein folding	1	14	1	3	0	0
GO:0006465	Biological Process	signal peptide processing	0	1	0	0	0	2
GO:0006468	Biological Process	protein phosphorylation	2	1	2	2	0	0
GO:0006479	Biological Process	protein methylation	0	0	0	0	0	1
GO:0006486	Biological Process	protein glycosylation	0	0	0	0	1	0
GO:0006487	Biological Process	protein N-linked glycosylation	0	1	0	1	0	0
GO:0006488	Biological Process	dolichol-linked oligosaccharide biosynthetic process	0	1	0	0	0	1
GO:0006508	Biological Process	proteolysis	4	9	4	4	0	1
GO:0006511	Biological Process	ubiquitin-dependent protein catabolic process	0	2	0	0	0	0
GO:0006520	Biological Process	cellular amino acid metabolic process	0	1	0	0	0	0
GO:0006535	Biological Process	cysteine biosynthetic process from serine	1	0	0	0	0	0
GO:0006541	Biological Process	glutamine metabolic process	0	0	1	0	0	0
GO:0006542	Biological Process	glutamine biosynthetic process	0	0	0	0	0	1
GO:0006556	Biological Process	S-adenosylmethionine biosynthetic process	0	1	2	0	0	0
GO:0006559	Biological Process	L-phenylalanine catabolic process	0	1	2	0	0	1
GO:0006606	Biological Process	protein import into nucleus	0	1	1	0	1	0
GO:0006607	Biological Process	NLS-bearing protein import into nucleus	0	1	1	0	0	1
GO:0006624	Biological Process	vacuolar protein processing	0	1	0	0	0	0
GO:0006627	Biological Process	protein processing involved in protein targeting to mitochondrion	0	1	0	1	0	0
GO:0006629	Biological Process	lipid metabolic process	0	2	0	1	0	1
GO:0006633	Biological Process	fatty acid biosynthetic process	0	0	0	1	0	1
GO:0006651	Biological Process	diacylglycerol biosynthetic process	0	1	0	1	0	0
GO:0006730	Biological Process	one-carbon metabolic process	0	4	2	0	0	1
GO:0006749	Biological Process	glutathione metabolic process	1	1	0	1	0	1
GO:0006790	Biological Process	sulfur compound metabolic process	0	1	0	0	0	0
GO:0006810	Biological Process	transport	2	3	0	1	0	0
GO:0006833	Biological Process	water transport	0	0	0	0	0	1
GO:0006839	Biological Process	mitochondrial transport	0	1	0	0	0	0
GO:0006855	Biological Process	drug transmembrane transport	0	0	1	0	0	0
GO:0006869	Biological Process	lipid transport	1	1	1	1	0	0
GO:0006875	Biological Process	cellular metal ion homeostasis	0	0	0	0	0	1
GO:0006886	Biological Process	intracellular protein transport	1	2	0	0	0	2
GO:0006887	Biological Process	exocytosis	2	0	0	0	0	0
GO:0006888	Biological Process	ER to Golgi vesicle-mediated transport	1	0	0	0	0	0
GO:0006890	Biological Process	retrograde vesicle-mediated transport, Golgi to ER	2	1	0	0	0	0
GO:0006891	Biological Process	intra-Golgi vesicle-mediated transport	1	0	0	0	0	0
GO:0006897	Biological Process	endocytosis	1	1	0	0	0	0
GO:0006904	Biological Process	vesicle docking involved in exocytosis	0	0	1	0	0	0
GO:0006906	Biological Process	vesicle fusion	2	0	0	0	0	0
GO:0006950	Biological Process	response to stress	1	2	0	1	0	0
GO:0006952	Biological Process	defense response	0	1	0	0	0	0
GO:0006970	Biological Process	response to osmotic stress	0	3	0	0	0	0
GO:0006979	Biological Process	response to oxidative stress	1	2	1	0	0	2
GO:0006983	Biological Process	ER overload response	0	1	0	1	0	0
GO:0006999	Biological Process	nuclear pore organization	0	1	1	0	0	1
GO:0007017	Biological Process	microtubule-based process	0	1	0	1	0	0
GO:0007018	Biological Process	microtubule-based movement	0	1	1	1	0	1
GO:0007021	Biological Process	tubulin complex assembly	1	0	0	1	0	0
GO:0007023	Biological Process	post-chaperonin tubulin folding pathway	1	0	0	1	0	0
GO:0007051	Biological Process	spindle organization	0	1	0	0	0	0
GO:0007264	Biological Process	small GTPase mediated signal transduction	0	3	0	0	0	0
GO:0007568	Biological Process	aging	0	0	0	0	0	1
GO:0008017	Molecular Function	microtubule binding	0	0	1	0	0	1
GO:0008061	Molecular Function	chitin binding	0	1	0	0	0	0
GO:0008081	Molecular Function	phosphoric diester hydrolase activity	0	0	0	1	0	1
GO:0008097	Molecular Function	5S rRNA binding	0	0	0	1	0	0
GO:0008113	Molecular Function	peptide-methionine (S)-S-oxide reductase activity	0	0	0	0	0	1
GO:0008121	Molecular Function	ubiquinol-cytochrome-c reductase activity	0	0	0	0	0	1
GO:0008137	Molecular Function	NADH dehydrogenase (ubiquinone) activity	0	0	0	0	0	1
GO:0008139	Molecular Function	nuclear localization sequence binding	0	0	0	0	1	0
GO:0008146	Molecular Function	sulfotransferase activity	0	1	0	1	0	0
GO:0008152	Biological Process	metabolic process	1	6	2	1	0	2
GO:0008171	Molecular Function	O-methyltransferase activity	0	0	1	0	0	1
GO:0008177	Molecular Function	succinate dehydrogenase (ubiquinone) activity	0	1	0	0	0	0
GO:0008184	Molecular Function	glycogen phosphorylase activity	0	2	0	0	0	0
GO:0008233	Molecular Function	peptidase activity	1	2	1	1	0	2
GO:0008236	Molecular Function	serine-type peptidase activity	0	1	0	1	0	0
GO:0008239	Molecular Function	dipeptidyl-peptidase activity	0	1	0	0	0	0
GO:0008240	Molecular Function	tripeptidyl-peptidase activity	0	0	0	1	0	0
GO:0008253	Molecular Function	5'-nucleotidase activity	0	0	1	0	0	0
GO:0008270	Molecular Function	zinc ion binding	1	20	1	4	0	1
GO:0008289	Molecular Function	lipid binding	0	1	0	1	0	0
GO:0008360	Biological Process	regulation of cell shape	1	1	0	0	0	0
GO:0008417	Molecular Function	fucosyltransferase activity	0	0	0	0	1	0
GO:0008422	Molecular Function	beta-glucosidase activity	1	1	1	0	0	1
GO:0008515	Molecular Function	sucrose transmembrane transporter activity	0	0	0	0	0	1
GO:0008534	Molecular Function	oxidized purine nucleobase lesion DNA N-glycosylase activity	0	1	0	0	0	0
GO:0008536	Molecular Function	Ran GTPase binding	0	1	1	0	0	0
GO:0008540	Cellular Component	proteasome regulatory particle, base subcomplex	0	0	0	1	0	0
GO:0008559	Molecular Function	xenobiotic transmembrane transporting ATPase activity	0	0	1	0	0	0
GO:0008568	Molecular Function	microtubule-severing ATPase activity	0	0	0	0	1	0
GO:0008643	Biological Process	carbohydrate transport	1	1	0	0	0	0
GO:0008652	Biological Process	cellular amino acid biosynthetic process	0	1	0	1	0	0
GO:0008705	Molecular Function	methionine synthase activity	0	0	0	1	0	0
GO:0008757	Molecular Function	S-adenosylmethionine-dependent methyltransferase activity	1	1	3	0	1	1
GO:0008777	Molecular Function	acetylornithine deacetylase activity	0	0	0	0	0	1
GO:0008802	Molecular Function	betaine-aldehyde dehydrogenase activity	0	1	0	0	0	0
GO:0008836	Molecular Function	diaminopimelate decarboxylase activity	0	1	0	0	0	0
GO:0008863	Molecular Function	formate dehydrogenase (NAD+) activity	0	0	1	0	0	0
GO:0008878	Molecular Function	glucose-1-phosphate adenylyltransferase activity	0	1	0	0	0	0
GO:0008967	Molecular Function	phosphoglycolate phosphatase activity	0	0	0	1	0	0
GO:0009001	Molecular Function	serine O-acetyltransferase activity	1	0	0	0	0	0
GO:0009044	Molecular Function	xylan 1,4-beta-xylosidase activity	1	1	1	0	0	0
GO:0009045	Molecular Function	xylose isomerase activity	0	1	0	0	0	0
GO:0009052	Biological Process	pentose-phosphate shunt, non-oxidative branch	0	0	0	1	0	0
GO:0009055	Molecular Function	electron transfer activity	0	2	0	1	0	2
GO:0009058	Biological Process	biosynthetic process	0	3	0	2	0	0
GO:0009060	Biological Process	aerobic respiration	0	1	0	1	0	1
GO:0009070	Biological Process	serine family amino acid biosynthetic process	0	0	1	0	0	0
GO:0009072	Biological Process	aromatic amino acid family metabolic process	0	0	0	1	0	0
GO:0009082	Biological Process	branched-chain amino acid biosynthetic process	0	0	0	1	0	0
GO:0009086	Biological Process	methionine biosynthetic process	0	0	0	1	0	0
GO:0009089	Biological Process	lysine biosynthetic process via diaminopimelate	0	1	0	0	0	0
GO:0009097	Biological Process	isoleucine biosynthetic process	0	0	1	0	0	0
GO:0009098	Biological Process	leucine biosynthetic process	0	0	0	1	0	0
GO:0009099	Biological Process	valine biosynthetic process	0	0	1	0	0	0
GO:0009107	Biological Process	lipoate biosynthetic process	0	0	1	0	0	0
GO:0009150	Biological Process	purine ribonucleotide metabolic process	0	1	0	0	0	0
GO:0009247	Biological Process	glycolipid biosynthetic process	0	1	0	1	0	0
GO:0009249	Biological Process	protein lipoylation	0	0	1	0	0	0
GO:0009328	Cellular Component	phenylalanine-tRNA ligase complex	0	1	0	0	0	0
GO:0009408	Biological Process	response to heat	0	3	2	0	0	0
GO:0009414	Biological Process	response to water deprivation	0	5	0	1	0	0
GO:0009416	Biological Process	response to light stimulus	0	1	0	1	0	0
GO:0009501	Cellular Component	amyloplast	0	1	0	0	0	0
GO:0009504	Cellular Component	cell plate	0	0	0	1	0	0
GO:0009505	Cellular Component	plant-type cell wall	3	7	3	2	1	1
GO:0009506	Cellular Component	plasmodesma	7	10	4	1	0	2
GO:0009507	Cellular Component	chloroplast	0	14	3	8	0	2
GO:0009508	Cellular Component	plastid chromosome	0	1	0	1	0	0
GO:0009516	Cellular Component	leucoplast	0	1	0	0	0	0
GO:0009535	Cellular Component	chloroplast thylakoid membrane	0	2	0	1	0	0
GO:0009536	Cellular Component	plastid	0	4	2	1	0	0
GO:0009570	Cellular Component	chloroplast stroma	0	11	0	6	0	2
GO:0009579	Cellular Component	thylakoid	0	2	0	1	0	0
GO:0009590	Biological Process	detection of gravity	0	2	0	1	0	0
GO:0009607	Biological Process	response to biotic stimulus	0	1	0	0	0	0
GO:0009644	Biological Process	response to high light intensity	0	0	1	0	0	0
GO:0009651	Biological Process	response to salt stress	0	4	0	2	0	1
GO:0009658	Biological Process	chloroplast organization	0	1	0	0	0	0
GO:0009664	Biological Process	plant-type cell wall organization	0	1	0	0	0	0
GO:0009678	Molecular Function	hydrogen-translocating pyrophosphatase activity	0	2	0	1	0	1
GO:0009695	Biological Process	jasmonic acid biosynthetic process	0	1	0	0	0	0
GO:0009706	Cellular Component	chloroplast inner membrane	0	1	0	1	0	1
GO:0009718	Biological Process	anthocyanin-containing compound biosynthetic process	0	0	0	1	0	0
GO:0009723	Biological Process	response to ethylene	2	1	1	0	0	1
GO:0009733	Biological Process	response to auxin	0	1	0	1	0	0
GO:0009734	Biological Process	auxin-activated signaling pathway	0	1	0	0	0	1
GO:0009735	Biological Process	response to cytokinin	0	1	0	0	0	0
GO:0009737	Biological Process	response to abscisic acid	0	2	0	0	0	0
GO:0009738	Biological Process	abscisic acid-activated signaling pathway	0	1	0	0	0	0
GO:0009739	Biological Process	response to gibberellin	0	1	0	1	0	0
GO:0009741	Biological Process	response to brassinosteroid	1	0	1	0	0	0
GO:0009742	Biological Process	brassinosteroid mediated signaling pathway	0	1	0	0	0	1
GO:0009751	Biological Process	response to salicylic acid	0	1	0	1	0	0
GO:0009753	Biological Process	response to jasmonic acid	0	1	0	1	0	0
GO:0009788	Biological Process	negative regulation of abscisic acid-activated signaling pathway	1	0	1	0	0	1
GO:0009791	Biological Process	post-embryonic development	1	0	1	0	0	0
GO:0009793	Biological Process	embryo development ending in seed dormancy	2	2	1	1	0	0
GO:0009800	Biological Process	cinnamic acid biosynthetic process	0	1	2	0	0	1
GO:0009805	Biological Process	coumarin biosynthetic process	1	1	2	0	0	3
GO:0009809	Biological Process	lignin biosynthetic process	1	2	2	0	0	3
GO:0009813	Biological Process	flavonoid biosynthetic process	1	4	0	3	1	1
GO:0009817	Biological Process	defense response to fungus, incompatible interaction	0	0	0	0	0	1
GO:0009834	Biological Process	plant-type secondary cell wall biogenesis	0	4	1	0	0	0
GO:0009845	Biological Process	seed germination	0	0	1	0	0	3
GO:0009846	Biological Process	pollen germination	1	0	0	1	0	0
GO:0009853	Biological Process	photorespiration	0	0	0	0	0	1
GO:0009860	Biological Process	pollen tube growth	1	0	0	0	0	0
GO:0009867	Biological Process	jasmonic acid mediated signaling pathway	0	0	0	0	0	1
GO:0009873	Biological Process	ethylene-activated signaling pathway	0	1	0	1	0	0
GO:0009887	Biological Process	animal organ morphogenesis	0	0	0	0	0	1
GO:0009941	Cellular Component	chloroplast envelope	0	4	1	1	0	0
GO:0009964	Biological Process	negative regulation of flavonoid biosynthetic process	0	1	0	1	0	0
GO:0009966	Biological Process	regulation of signal transduction	0	1	0	1	0	0
GO:0009991	Biological Process	response to extracellular stimulus	0	0	0	0	0	1
GO:0009992	Biological Process	cellular water homeostasis	0	0	0	0	0	1
GO:0010008	Cellular Component	endosome membrane	0	1	0	0	0	1
GO:0010027	Biological Process	thylakoid membrane organization	0	2	0	1	0	0
GO:0010154	Biological Process	fruit development	0	0	0	0	0	1
GO:0010181	Molecular Function	FMN binding	0	2	0	1	0	1
GO:0010205	Biological Process	photoinhibition	0	1	1	0	0	0
GO:0010206	Biological Process	photosystem II repair	0	1	0	0	0	0
GO:0010286	Biological Process	heat acclimation	0	1	0	0	0	0
GO:0010304	Biological Process	PSII associated light-harvesting complex II catabolic process	0	1	0	0	0	0
GO:0010305	Biological Process	leaf vascular tissue pattern formation	0	1	0	0	0	1
GO:0010319	Cellular Component	stromule	0	2	0	1	0	0
GO:0010417	Biological Process	glucuronoxylan biosynthetic process	0	1	0	0	0	0
GO:0010427	Molecular Function	abscisic acid binding	0	1	0	0	0	0
GO:0010431	Biological Process	seed maturation	0	0	0	1	0	1
GO:0010483	Biological Process	pollen tube reception	1	0	1	0	0	0
GO:0010608	Biological Process	posttranscriptional regulation of gene expression	0	1	0	0	0	0
GO:0010731	Biological Process	protein glutathionylation	0	0	0	0	0	1
GO:0010951	Biological Process	negative regulation of endopeptidase activity	1	0	1	0	0	0
GO:0010997	Molecular Function	anaphase-promoting complex binding	0	0	0	0	0	1
GO:0015030	Cellular Component	Cajal body	0	1	0	0	0	0
GO:0015031	Biological Process	protein transport	2	1	0	0	0	0
GO:0015088	Molecular Function	copper ion transmembrane transporter activity	0	0	0	0	0	1
GO:0015095	Molecular Function	magnesium ion transmembrane transporter activity	0	0	0	0	0	1
GO:0015098	Molecular Function	molybdate ion transmembrane transporter activity	0	1	0	0	0	0
GO:0015250	Molecular Function	water channel activity	0	0	0	0	0	1
GO:0015254	Molecular Function	glycerol channel activity	0	0	0	0	0	1
GO:0015446	Molecular Function	ATPase-coupled arsenite transmembrane transporter activity	0	1	0	0	0	0
GO:0015450	Molecular Function	P-P-bond-hydrolysis-driven protein transmembrane transporter activity	0	1	0	0	0	0
GO:0015485	Molecular Function	cholesterol binding	0	1	0	0	0	0
GO:0015631	Molecular Function	tubulin binding	0	0	0	1	0	0
GO:0015689	Biological Process	molybdate ion transport	0	1	0	0	0	0
GO:0015693	Biological Process	magnesium ion transport	0	0	0	0	0	1
GO:0015770	Biological Process	sucrose transport	0	0	0	0	0	1
GO:0015793	Biological Process	glycerol transport	0	0	0	0	0	1
GO:0015866	Biological Process	ADP transport	0	1	0	0	0	0
GO:0015867	Biological Process	ATP transport	0	1	0	0	0	0
GO:0015934	Cellular Component	large ribosomal subunit	0	1	0	0	0	1
GO:0015979	Biological Process	photosynthesis	0	0	1	0	0	0
GO:0015986	Biological Process	ATP synthesis coupled proton transport	0	2	0	1	0	1
GO:0015991	Biological Process	ATP hydrolysis coupled proton transport	0	3	0	1	0	1
GO:0015992	Biological Process	proton transmembrane transport	0	2	0	1	0	1
GO:0016020	Cellular Component	membrane	2	3	2	3	0	1
GO:0016021	Cellular Component	integral component of membrane	16	60	19	16	3	23
GO:0016034	Molecular Function	maleylacetoacetate isomerase activity	0	0	0	1	0	0
GO:0016042	Biological Process	lipid catabolic process	0	1	0	0	0	0
GO:0016050	Biological Process	vesicle organization	0	1	0	1	0	0
GO:0016055	Biological Process	Wnt signaling pathway	1	1	0	0	0	0
GO:0016126	Biological Process	sterol biosynthetic process	1	1	1	0	0	0
GO:0016192	Biological Process	vesicle-mediated transport	0	2	0	0	0	3
GO:0016207	Molecular Function	4-coumarate-CoA ligase activity	0	0	1	0	0	0
GO:0016210	Molecular Function	naringenin-chalcone synthase activity	1	0	0	1	0	0
GO:0016226	Biological Process	iron-sulfur cluster assembly	0	1	0	0	0	0
GO:0016272	Cellular Component	prefoldin complex	0	1	0	0	0	0
GO:0016282	Cellular Component	eukaryotic 43S preinitiation complex	0	1	0	1	0	0
GO:0016301	Molecular Function	kinase activity	1	1	1	2	0	2
GO:0016310	Biological Process	phosphorylation	1	1	1	1	0	2
GO:0016311	Biological Process	dephosphorylation	0	0	1	1	0	0
GO:0016314	Molecular Function	phosphatidylinositol-3,4,5-trisphosphate 3-phosphatase activity	0	0	0	0	0	1
GO:0016407	Molecular Function	acetyltransferase activity	0	1	0	0	0	0
GO:0016413	Molecular Function	O-acetyltransferase activity	0	1	0	0	0	0
GO:0016459	Cellular Component	myosin complex	2	0	0	0	0	0
GO:0016485	Biological Process	protein processing	0	3	0	1	0	0
GO:0016491	Molecular Function	oxidoreductase activity	0	1	0	0	0	0
GO:0016567	Biological Process	protein ubiquitination	0	0	0	1	0	0
GO:0016592	Cellular Component	mediator complex	0	3	0	1	0	0
GO:0016597	Molecular Function	amino acid binding	0	1	1	3	0	0
GO:0016598	Biological Process	protein arginylation	1	0	0	0	0	0
GO:0016620	Molecular Function	oxidoreductase activity, acting on the aldehyde or oxo group of donors, NAD or NADP as acceptor	0	2	0	0	0	0
GO:0016627	Molecular Function	oxidoreductase activity, acting on the CH-CH group of donors	0	1	0	0	0	0
GO:0016629	Molecular Function	12-oxophytodienoate reductase activity	0	1	0	0	0	0
GO:0016630	Molecular Function	protochlorophyllide reductase activity	0	1	0	0	0	0
GO:0016656	Molecular Function	monodehydroascorbate reductase (NADH) activity	0	1	0	0	0	0
GO:0016688	Molecular Function	L-ascorbate peroxidase activity	1	0	1	0	0	1
GO:0016702	Molecular Function	oxidoreductase activity, acting on single donors with incorporation of molecular oxygen, incorporation of two atoms of oxygen	0	1	0	0	0	0
GO:0016705	Molecular Function	oxidoreductase activity, acting on paired donors, with incorporation or reduction of molecular oxygen	0	0	1	0	0	0
GO:0016711	Molecular Function	flavonoid 3'-monooxygenase activity	0	1	0	0	0	1
GO:0016740	Molecular Function	transferase activity	2	3	2	0	1	1
GO:0016746	Molecular Function	transferase activity, transferring acyl groups	0	1	0	0	0	0
GO:0016747	Molecular Function	transferase activity, transferring acyl groups other than amino-acyl groups	0	1	1	0	0	0
GO:0016757	Molecular Function	transferase activity, transferring glycosyl groups	1	2	0	0	0	0
GO:0016758	Molecular Function	transferase activity, transferring hexosyl groups	0	1	1	0	0	0
GO:0016760	Molecular Function	cellulose synthase (UDP-forming) activity	0	2	2	0	0	0
GO:0016779	Molecular Function	nucleotidyltransferase activity	0	3	0	1	0	0
GO:0016787	Molecular Function	hydrolase activity	0	6	2	2	1	2
GO:0016798	Molecular Function	hydrolase activity, acting on glycosyl bonds	0	1	0	0	0	0
GO:0016817	Molecular Function	hydrolase activity, acting on acid anhydrides	0	0	1	0	0	0
GO:0016829	Molecular Function	lyase activity	1	1	2	0	0	0
GO:0016832	Molecular Function	aldehyde-lyase activity	0	1	0	0	0	0
GO:0016874	Molecular Function	ligase activity	0	1	0	0	0	0
GO:0016887	Molecular Function	ATPase activity	2	1	1	0	0	2
GO:0016925	Biological Process	protein sumoylation	0	0	0	1	0	0
GO:0016985	Molecular Function	mannan endo-1,4-beta-mannosidase activity	0	0	1	0	0	1
GO:0016992	Molecular Function	lipoate synthase activity	0	0	1	0	0	0
GO:0016998	Biological Process	cell wall macromolecule catabolic process	0	1	0	0	0	0
GO:0017056	Molecular Function	structural constituent of nuclear pore	0	0	1	0	0	0
GO:0017089	Molecular Function	glycolipid transporter activity	0	1	0	1	0	0
GO:0018105	Biological Process	peptidyl-serine phosphorylation	1	1	0	0	0	0
GO:0018108	Biological Process	peptidyl-tyrosine phosphorylation	3	2	1	0	1	1
GO:0019013	Cellular Component	viral nucleocapsid	1	4	0	1	0	0
GO:0019166	Molecular Function	trans-2-enoyl-CoA reductase (NADPH) activity	0	1	0	0	0	0
GO:0019243	Biological Process	methylglyoxal catabolic process to D-lactate via S-lactoyl-glutathione	0	1	1	0	0	0
GO:0019249	Biological Process	lactate biosynthetic process	0	1	0	0	0	0
GO:0019252	Biological Process	starch biosynthetic process	0	3	0	1	0	0
GO:0019253	Biological Process	reductive pentose-phosphate cycle	0	0	0	1	0	0
GO:0019285	Biological Process	glycine betaine biosynthetic process from choline	0	1	0	0	0	0
GO:0019323	Biological Process	pentose catabolic process	0	0	0	1	0	0
GO:0019388	Biological Process	galactose catabolic process	0	2	0	1	0	0
GO:0019430	Biological Process	removal of superoxide radicals	0	2	0	0	0	0
GO:0019438	Biological Process	aromatic compound biosynthetic process	0	0	1	0	0	1
GO:0019509	Biological Process	L-methionine salvage from methylthioadenosine	0	0	1	0	1	0
GO:0019538	Biological Process	protein metabolic process	0	1	0	0	0	0
GO:0019632	Biological Process	shikimate metabolic process	0	0	0	1	0	0
GO:0019748	Biological Process	secondary metabolic process	0	1	1	0	0	0
GO:0019773	Cellular Component	proteasome core complex, alpha-subunit complex	0	1	0	0	0	0
GO:0019843	Molecular Function	rRNA binding	1	1	0	0	1	0
GO:0019867	Cellular Component	outer membrane	0	1	0	0	0	0
GO:0019904	Molecular Function	protein domain specific binding	0	4	1	0	0	0
GO:0019941	Biological Process	modification-dependent protein catabolic process	0	0	0	1	0	0
GO:0020037	Molecular Function	heme binding	1	4	2	0	0	5
GO:0022625	Cellular Component	cytosolic large ribosomal subunit	1	4	0	2	1	5
GO:0022626	Cellular Component	cytosolic ribosome	0	1	0	1	0	0
GO:0022627	Cellular Component	cytosolic small ribosomal subunit	0	5	1	1	1	3
GO:0022900	Biological Process	electron transport chain	0	2	0	1	0	1
GO:0030001	Biological Process	metal ion transport	0	1	0	0	0	1
GO:0030091	Biological Process	protein repair	0	0	0	0	0	1
GO:0030126	Cellular Component	COPI vesicle coat	2	1	0	0	0	0
GO:0030145	Molecular Function	manganese ion binding	0	3	1	2	0	0
GO:0030163	Biological Process	protein catabolic process	1	2	1	1	0	0
GO:0030170	Molecular Function	pyridoxal phosphate binding	0	4	0	0	0	1
GO:0030176	Cellular Component	integral component of endoplasmic reticulum membrane	0	1	0	1	0	0
GO:0030234	Molecular Function	enzyme regulator activity	0	0	0	1	0	0
GO:0030244	Biological Process	cellulose biosynthetic process	0	2	2	0	0	0
GO:0030246	Molecular Function	carbohydrate binding	0	4	0	0	0	0
GO:0030308	Biological Process	negative regulation of cell growth	1	0	1	0	0	0
GO:0030433	Biological Process	ubiquitin-dependent ERAD pathway	0	1	0	0	0	0
GO:0030515	Molecular Function	snoRNA binding	0	0	0	1	0	0
GO:0030529	Cellular Component	intracellular ribonucleoprotein complex	1	1	0	0	0	0
GO:0030599	Molecular Function	pectinesterase activity	0	0	1	0	0	0
GO:0030687	Cellular Component	preribosome, large subunit precursor	0	1	0	1	0	0
GO:0030775	Molecular Function	glucuronoxylan 4-O-methyltransferase activity	0	0	0	0	0	1
GO:0030931	Cellular Component	heterotetrameric ADPG pyrophosphorylase complex	0	1	0	0	0	0
GO:0030955	Molecular Function	potassium ion binding	0	1	0	2	0	1
GO:0030968	Biological Process	endoplasmic reticulum unfolded protein response	0	0	0	0	0	1
GO:0030976	Molecular Function	thiamine pyrophosphate binding	0	1	1	1	0	0
GO:0031201	Cellular Component	SNARE complex	2	0	0	0	0	0
GO:0031222	Biological Process	arabinan catabolic process	1	1	1	0	0	0
GO:0031225	Cellular Component	anchored component of membrane	0	1	0	0	0	0
GO:0031307	Cellular Component	integral component of mitochondrial outer membrane	0	1	0	0	0	0
GO:0031369	Molecular Function	translation initiation factor binding	0	1	0	1	0	0
GO:0031386	Molecular Function	protein tag	0	0	0	1	0	0
GO:0031408	Biological Process	oxylipin biosynthetic process	0	2	0	0	0	0
GO:0031418	Molecular Function	L-ascorbic acid binding	0	1	0	1	0	0
GO:0031428	Cellular Component	box C/D snoRNP complex	0	0	0	1	0	0
GO:0031625	Molecular Function	ubiquitin protein ligase binding	0	1	0	0	0	0
GO:0031627	Biological Process	telomeric loop formation	0	1	0	1	0	0
GO:0031965	Cellular Component	nuclear membrane	0	2	0	1	0	1
GO:0031966	Cellular Component	mitochondrial membrane	0	1	0	0	0	0
GO:0032040	Cellular Component	small-subunit processome	0	0	0	1	0	0
GO:0032153	Cellular Component	cell division site	0	0	0	1	0	0
GO:0032259	Biological Process	methylation	3	2	6	1	1	4
GO:0032440	Molecular Function	2-alkenal reductase [NAD(P)] activity	0	7	2	2	0	0
GO:0032450	Molecular Function	maltose alpha-glucosidase activity	0	1	0	0	0	0
GO:0032515	Biological Process	negative regulation of phosphoprotein phosphatase activity	0	1	0	0	0	0
GO:0032543	Biological Process	mitochondrial translation	0	0	1	0	0	0
GO:0032580	Cellular Component	Golgi cisterna membrane	0	0	0	0	1	0
GO:0032933	Biological Process	SREBP signaling pathway	0	1	0	0	0	0
GO:0033180	Cellular Component	proton-transporting V-type ATPase, V1 domain	0	1	0	0	0	0
GO:0033290	Cellular Component	eukaryotic 48S preinitiation complex	0	1	0	2	0	0
GO:0033729	Molecular Function	anthocyanidin reductase activity	0	1	0	1	0	0
GO:0033858	Molecular Function	N-acetylgalactosamine kinase activity	0	1	0	1	0	0
GO:0034047	Biological Process	regulation of phosphoprotein phosphatase activity	0	1	0	1	0	0
GO:0034220	Biological Process	ion transmembrane transport	0	0	0	0	0	1
GO:0034515	Cellular Component	proteasome storage granule	0	0	0	1	0	0
GO:0034976	Biological Process	response to endoplasmic reticulum stress	0	2	0	0	0	0
GO:0035335	Biological Process	peptidyl-tyrosine dephosphorylation	0	0	0	0	0	1
GO:0035434	Biological Process	copper ion transmembrane transport	0	0	0	0	0	1
GO:0036065	Biological Process	fucosylation	0	0	0	0	1	0
GO:0036228	Biological Process	protein localization to nuclear inner membrane	0	0	1	0	0	0
GO:0042026	Biological Process	protein refolding	0	2	0	0	0	0
GO:0042176	Biological Process	regulation of protein catabolic process	0	0	0	1	0	0
GO:0042183	Biological Process	formate catabolic process	0	0	1	0	0	0
GO:0042254	Biological Process	ribosome biogenesis	0	1	0	1	0	0
GO:0042273	Biological Process	ribosomal large subunit biogenesis	0	0	0	0	0	1
GO:0042277	Molecular Function	peptide binding	0	1	1	0	0	0
GO:0042285	Molecular Function	xylosyltransferase activity	0	1	0	0	0	0
GO:0042393	Molecular Function	histone binding	0	1	0	0	0	0
GO:0042409	Molecular Function	caffeoyl-CoA O-methyltransferase activity	1	0	2	0	0	2
GO:0042542	Biological Process	response to hydrogen peroxide	0	0	1	0	0	0
GO:0042545	Biological Process	cell wall modification	0	0	1	0	0	0
GO:0042626	Molecular Function	ATPase activity, coupled to transmembrane movement of substances	0	1	0	0	0	0
GO:0042732	Biological Process	D-xylose metabolic process	0	1	0	0	0	0
GO:0042742	Biological Process	defense response to bacterium	0	3	0	0	0	1
GO:0042744	Biological Process	hydrogen peroxide catabolic process	0	2	1	0	0	0
GO:0042802	Molecular Function	identical protein binding	0	2	0	0	0	1
GO:0042803	Molecular Function	protein homodimerization activity	0	3	0	0	0	1
GO:0042908	Biological Process	xenobiotic transport	0	0	1	0	0	0
GO:0043022	Molecular Function	ribosome binding	0	0	0	1	0	0
GO:0043066	Biological Process	negative regulation of apoptotic process	0	1	0	1	0	0
GO:0043086	Biological Process	negative regulation of catalytic activity	0	2	1	1	0	0
GO:0043161	Biological Process	proteasome-mediated ubiquitin-dependent protein catabolic process	0	0	0	1	0	0
GO:0043169	Molecular Function	cation binding	0	1	0	0	0	0
GO:0043231	Cellular Component	intracellular membrane-bounded organelle	0	2	0	0	1	0
GO:0043461	Biological Process	proton-transporting ATP synthase complex assembly	0	1	0	0	0	0
GO:0043547	Biological Process	positive regulation of GTPase activity	1	1	1	0	1	0
GO:0043565	Molecular Function	sequence-specific DNA binding	1	1	0	0	0	0
GO:0043614	Cellular Component	multi-eIF complex	0	0	0	1	0	0
GO:0043666	Biological Process	regulation of phosphoprotein phosphatase activity	0	1	0	1	0	0
GO:0043680	Cellular Component	filiform apparatus	1	0	1	0	0	0
GO:0043754	Molecular Function	dihydrolipoyllysine-residue (2-methylpropanoyl)transferase activity	0	1	0	0	0	0
GO:0044208	Biological Process	'de novo' AMP biosynthetic process	0	0	0	1	0	0
GO:0044262	Biological Process	cellular carbohydrate metabolic process	0	0	0	1	0	0
GO:0044613	Cellular Component	nuclear pore central transport channel	0	1	1	0	0	1
GO:0044615	Cellular Component	nuclear pore nuclear basket	0	1	0	0	0	1
GO:0044765	Biological Process	transport	0	0	1	0	0	0
GO:0045037	Biological Process	protein import into chloroplast stroma	0	0	0	0	0	1
GO:0045047	Biological Process	protein targeting to ER	0	0	0	0	0	1
GO:0045048	Biological Process	protein insertion into ER membrane	0	1	0	0	0	0
GO:0045330	Molecular Function	aspartyl esterase activity	0	0	1	0	0	0
GO:0045430	Molecular Function	chalcone isomerase activity	0	1	0	1	0	0
GO:0045454	Biological Process	cell redox homeostasis	0	4	0	1	0	0
GO:0045486	Molecular Function	naringenin 3-dioxygenase activity	0	1	0	1	0	0
GO:0045489	Biological Process	pectin biosynthetic process	1	0	1	0	0	0
GO:0045490	Biological Process	pectin catabolic process	0	0	1	0	0	0
GO:0045492	Biological Process	xylan biosynthetic process	0	0	1	0	0	1
GO:0045493	Biological Process	xylan catabolic process	1	2	2	0	0	0
GO:0045548	Molecular Function	phenylalanine ammonia-lyase activity	0	1	2	0	0	1
GO:0045551	Molecular Function	cinnamyl-alcohol dehydrogenase activity	0	1	0	0	0	0
GO:0045552	Molecular Function	dihydrokaempferol 4-reductase activity	0	0	0	1	0	0
GO:0045892	Biological Process	negative regulation of transcription, DNA-templated	0	1	0	1	0	1
GO:0045893	Biological Process	positive regulation of transcription, DNA-templated	1	1	0	0	0	0
GO:0045947	Biological Process	negative regulation of translational initiation	0	0	1	0	1	0
GO:0046029	Molecular Function	mannitol dehydrogenase activity	0	1	0	0	0	0
GO:0046034	Biological Process	ATP metabolic process	0	1	0	0	0	0
GO:0046040	Biological Process	IMP metabolic process	0	0	0	1	0	0
GO:0046355	Biological Process	mannan catabolic process	0	0	1	0	0	1
GO:0046373	Biological Process	L-arabinose metabolic process	0	2	0	0	0	0
GO:0046409	Molecular Function	p-coumarate 3-hydroxylase activity	0	1	0	0	0	1
GO:0046470	Biological Process	phosphatidylcholine metabolic process	0	1	0	0	0	0
GO:0046507	Molecular Function	UDPsulfoquinovose synthase activity	0	1	0	1	0	0
GO:0046523	Molecular Function	S-methyl-5-thioribose-1-phosphate isomerase activity	0	0	1	0	1	0
GO:0046540	Cellular Component	U4/U6 x U5 tri-snRNP complex	0	2	0	1	0	0
GO:0046556	Molecular Function	alpha-L-arabinofuranosidase activity	1	3	1	0	0	0
GO:0046604	Biological Process	positive regulation of mitotic centrosome separation	0	1	0	0	0	0
GO:0046658	Cellular Component	anchored component of plasma membrane	0	2	0	2	0	0
GO:0046686	Biological Process	response to cadmium ion	0	2	1	3	0	0
GO:0046740	Biological Process	transport of virus in host, cell to cell	1	0	0	0	0	0
GO:0046777	Biological Process	protein autophosphorylation	1	0	1	0	0	0
GO:0046835	Biological Process	carbohydrate phosphorylation	0	1	0	1	0	0
GO:0046836	Biological Process	glycolipid transport	0	1	0	1	0	0
GO:0046872	Molecular Function	metal ion binding	3	12	4	3	0	2
GO:0046910	Molecular Function	pectinesterase inhibitor activity	0	0	1	0	0	0
GO:0046914	Molecular Function	transition metal ion binding	0	1	0	0	0	1
GO:0046916	Biological Process	cellular transition metal ion homeostasis	0	1	0	0	0	1
GO:0046933	Molecular Function	proton-transporting ATP synthase activity, rotational mechanism	0	2	0	1	0	1
GO:0046961	Molecular Function	proton-transporting ATPase activity, rotational mechanism	0	1	0	0	0	0
GO:0046982	Molecular Function	protein heterodimerization activity	0	0	1	0	0	0
GO:0046983	Molecular Function	protein dimerization activity	0	1	2	2	0	1
GO:0047077	Molecular Function	Photinus-luciferin 4-monooxygenase (ATP-hydrolyzing) activity	0	0	1	0	0	0
GO:0047134	Molecular Function	protein-disulfide reductase activity	0	0	0	1	0	0
GO:0047262	Molecular Function	polygalacturonate 4-alpha-galacturonosyltransferase activity	1	0	1	0	0	0
GO:0047627	Molecular Function	adenylylsulfatase activity	0	1	0	0	0	0
GO:0047874	Molecular Function	dolichyldiphosphatase activity	0	1	0	1	0	0
GO:0047911	Molecular Function	galacturan 1,4-alpha-galacturonidase activity	0	1	1	0	0	0
GO:0047918	Molecular Function	GDP-mannose 3,5-epimerase activity	0	2	0	1	0	0
GO:0048027	Molecular Function	mRNA 5'-UTR binding	0	1	0	0	0	0
GO:0048046	Cellular Component	apoplast	0	4	0	2	0	0
GO:0048364	Biological Process	root development	1	0	1	0	0	0
GO:0048487	Molecular Function	beta-tubulin binding	1	0	0	0	0	0
GO:0048527	Biological Process	lateral root development	0	0	0	0	0	1
GO:0048573	Biological Process	photoperiodism, flowering	0	1	0	0	0	0
GO:0050321	Molecular Function	tau-protein kinase activity	1	0	1	0	0	0
GO:0050625	Molecular Function	2-hydroxy-1,4-benzoquinone reductase activity	0	1	0	1	0	1
GO:0050660	Molecular Function	flavin adenine dinucleotide binding	0	2	1	0	0	0
GO:0050661	Molecular Function	NADP binding	1	3	0	2	0	0
GO:0050662	Molecular Function	coenzyme binding	0	4	0	4	0	0
GO:0050667	Biological Process	homocysteine metabolic process	0	0	0	1	0	0
GO:0050790	Biological Process	regulation of catalytic activity	0	0	0	1	0	1
GO:0050832	Biological Process	defense response to fungus	1	3	1	0	0	0
GO:0050897	Molecular Function	cobalt ion binding	0	2	0	0	0	0
GO:0051028	Biological Process	mRNA transport	0	1	0	0	0	1
GO:0051082	Molecular Function	unfolded protein binding	1	10	0	3	0	0
GO:0051087	Molecular Function	chaperone binding	0	2	0	0	0	1
GO:0051287	Molecular Function	NAD binding	1	5	1	0	0	0
GO:0051301	Biological Process	cell division	0	1	0	0	1	0
GO:0051539	Molecular Function	4 iron, 4 sulfur cluster binding	0	0	1	0	0	0
GO:0051603	Biological Process	proteolysis involved in cellular protein catabolic process	0	2	2	0	0	0
GO:0051861	Molecular Function	glycolipid binding	0	1	0	1	0	0
GO:0051903	Molecular Function	S-(hydroxymethyl)glutathione dehydrogenase activity	0	2	0	0	0	0
GO:0051920	Molecular Function	peroxiredoxin activity	0	1	1	0	0	0
GO:0052696	Biological Process	flavonoid glucuronidation	0	1	0	0	1	0
GO:0052747	Molecular Function	sinapyl alcohol dehydrogenase activity	0	1	0	0	0	0
GO:0055085	Biological Process	transmembrane transport	0	6	0	2	0	4
GO:0055114	Biological Process	oxidation-reduction process	3	48	7	11	0	7
GO:0061615	Biological Process	glycolytic process through fructose-6-phosphate	2	1	0	0	0	0
GO:0070008	Molecular Function	serine-type exopeptidase activity	0	0	0	0	0	1
GO:0070125	Biological Process	mitochondrial translational elongation	0	0	0	1	0	0
GO:0070143	Biological Process	mitochondrial alanyl-tRNA aminoacylation	0	0	0	1	0	0
GO:0070180	Molecular Function	large ribosomal subunit rRNA binding	0	1	0	1	0	0
GO:0070181	Molecular Function	small ribosomal subunit rRNA binding	0	1	0	0	0	1
GO:0070290	Molecular Function	N-acylphosphatidylethanolamine-specific phospholipase D activity	0	1	0	0	0	0
GO:0070330	Molecular Function	aromatase activity	0	1	0	0	0	1
GO:0070469	Cellular Component	respiratory chain	0	1	0	0	0	1
GO:0070588	Biological Process	calcium ion transmembrane transport	0	2	0	0	0	0
GO:0071011	Cellular Component	precatalytic spliceosome	0	2	0	1	0	0
GO:0071013	Cellular Component	catalytic step 2 spliceosome	0	1	0	0	0	0
GO:0071435	Biological Process	potassium ion export	0	2	0	0	0	0
GO:0071541	Cellular Component	eukaryotic translation initiation factor 3 complex, eIF3m	0	0	0	1	0	0
GO:0071554	Biological Process	cell wall organization or biogenesis	0	1	0	0	0	0
GO:0071555	Biological Process	cell wall organization	1	3	4	1	0	1
GO:0071806	Biological Process	protein transmembrane transport	0	1	0	0	0	0
GO:0072593	Biological Process	reactive oxygen species metabolic process	0	0	0	0	0	1
GO:0080008	Cellular Component	Cul4-RING E3 ubiquitin ligase complex	0	0	0	0	0	1
GO:0080043	Molecular Function	quercetin 3-O-glucosyltransferase activity	0	1	0	0	1	0
GO:0080044	Molecular Function	quercetin 7-O-glucosyltransferase activity	0	1	0	0	1	0
GO:0080116	Molecular Function	glucuronoxylan glucuronosyltransferase activity	0	1	0	0	0	0
GO:0080130	Molecular Function	L-phenylalanine	0	1	0	0	0	0
GO:0080163	Biological Process	regulation of protein serine/threonine phosphatase activity	0	1	0	0	0	0
GO:0097361	Cellular Component	CIA complex	0	1	0	0	0	0
GO:0098655	Biological Process	cation transmembrane transport	0	1	0	0	0	0
GO:0098656	Biological Process	anion transmembrane transport	0	1	0	0	0	0
GO:0098869	Biological Process	cellular oxidant detoxification	1	4	2	0	0	1
GO:0102483	Molecular Function	scopolin beta-glucosidase activity	1	1	1	0	0	0
GO:1901657	Biological Process	glycosyl compound metabolic process	0	0	0	0	0	1
GO:1902600	Biological Process	proton transmembrane transport	0	0	0	0	0	1
GO:1903830	Biological Process	magnesium ion transmembrane transport	0	0	0	0	0	1
GO:2000280	Biological Process	regulation of root development	0	0	0	0	0	1

## Sheet: Supplementary Table 7
Supplementary Table 7. KEGG pathway enrichment analysis of all DEPs.
#Kegg_pathway	ko_id	UG3Y vs. UG6Y	UG3Y vs. UG9Y	UG3Y vs. UG11Y	UG6Y vs. UG9Y	UG6Y vs. UG11Y	UG9Y vs. UG11Y
Ribosome	ko03010	1	8	2	3	2	8
Protein processing in endoplasmic reticulum	ko04141	3	22	17	4	1	7
Phenylpropanoid biosynthesis	ko00940	1	3	4	0	0	5
Biosynthesis of amino acids	ko01230	4	13	3	12	0	3
Flavonoid biosynthesis	ko00941	2	3	2	4	0	3
Oxidative phosphorylation	ko00190	0	6	0	1	0	3
Stilbenoid, diarylheptanoid and gingerol biosynthesis	ko00945	1	1	2	0	0	3
Starch and sucrose metabolism	ko00500	0	6	2	1	0	2
Phenylalanine metabolism	ko00360	1	1	4	0	0	2
Glutathione metabolism	ko00480	2	1	1	0	0	2
Protein export	ko03060	1	2	0	0	0	2
Arginine biosynthesis	ko00220	0	1	0	0	0	2
Cyanoamino acid metabolism	ko00460	0	0	0	0	0	2
RNA transport	ko03013	0	5	2	5	2	1
Glycolysis / Gluconeogenesis	ko00010	4	19	1	9	0	1
Carbon metabolism	ko01200	4	15	2	8	0	1
Amino sugar and nucleotide sugar metabolism	ko00520	0	13	1	5	0	1
Pyruvate metabolism	ko00620	0	6	1	4	0	1
Purine metabolism	ko00230	0	5	1	4	0	1
Ascorbate and aldarate metabolism	ko00053	1	5	1	2	0	1
Cysteine and methionine metabolism	ko00270	1	3	1	2	0	1
2-Oxocarboxylic acid metabolism	ko01210	0	1	1	2	0	1
Fructose and mannose metabolism	ko00051	2	3	1	1	0	1
Ubiquinone and other terpenoid-quinone biosynthesis	ko00130	0	1	1	1	0	1
Glyoxylate and dicarboxylate metabolism	ko00630	0	0	1	1	0	1
Glycerophospholipid metabolism	ko00564	0	1	0	1	0	1
mRNA surveillance pathway	ko03015	0	1	0	1	0	1
Ubiquitin mediated proteolysis	ko04120	0	0	0	1	0	1
Sulfur metabolism	ko00920	1	1	0	0	0	1
Alanine, aspartate and glutamate metabolism	ko00250	0	1	0	0	0	1
Inositol phosphate metabolism	ko00562	0	0	0	0	0	1
Nitrogen metabolism	ko00910	0	0	0	0	0	1
Phosphatidylinositol signaling system	ko04070	0	0	0	0	0	1
Spliceosome	ko03040	0	7	2	3	0	0
Glycine, serine and threonine metabolism	ko00260	0	6	1	3	0	0
Pentose and glucuronate interconversions	ko00040	0	2	1	2	0	0
Carbon fixation in photosynthetic organisms	ko00710	1	5	0	2	0	0
Phagosome	ko04145	1	5	0	2	0	0
Pentose phosphate pathway	ko00030	2	3	0	2	0	0
Glycerolipid metabolism	ko00561	1	3	0	2	0	0
Circadian rhythm - plant	ko04712	1	1	0	2	0	0
Pyrimidine metabolism	ko00240	0	3	2	1	0	0
Endocytosis	ko04144	1	5	1	1	0	0
RNA degradation	ko03018	2	4	1	1	0	0
beta-Alanine metabolism	ko00410	0	3	1	1	0	0
Plant-pathogen interaction	ko04626	1	2	1	1	0	0
Selenocompound metabolism	ko00450	0	1	1	1	0	0
Valine, leucine and isoleucine biosynthesis	ko00290	0	0	1	1	0	0
Fatty acid degradation	ko00071	1	7	0	1	0	0
Galactose metabolism	ko00052	2	3	0	1	0	0
Lysine biosynthesis	ko00300	0	3	0	1	0	0
Arginine and proline metabolism	ko00330	0	3	0	1	0	0
Citrate cycle (TCA cycle)	ko00020	1	2	0	1	0	0
Valine, leucine and isoleucine degradation	ko00280	0	2	0	1	0	0
Lysine degradation	ko00310	0	2	0	1	0	0
Histidine metabolism	ko00340	0	2	0	1	0	0
Tryptophan metabolism	ko00380	0	2	0	1	0	0
Aminoacyl-tRNA biosynthesis	ko00970	0	2	0	1	0	0
Monobactam biosynthesis	ko00261	0	1	0	1	0	0
Phenylalanine, tyrosine and tryptophan biosynthesis	ko00400	0	1	0	1	0	0
N-Glycan biosynthesis	ko00510	0	1	0	1	0	0
Limonene and pinene degradation	ko00903	0	1	0	1	0	0
Ribosome biogenesis in eukaryotes	ko03008	0	1	0	1	0	0
RNA polymerase	ko03020	0	1	0	1	0	0
Proteasome	ko03050	0	0	0	1	0	0
Pantothenate and CoA biosynthesis	ko00770	0	1	2	0	0	0
Steroid biosynthesis	ko00100	1	1	1	0	0	0
Riboflavin metabolism	ko00740	0	1	1	0	0	0
Butanoate metabolism	ko00650	0	0	1	0	0	0
C5-Branched dibasic acid metabolism	ko00660	0	0	1	0	0	0
Nicotinate and nicotinamide metabolism	ko00760	0	0	1	0	0	0
Tyrosine metabolism	ko00350	1	5	0	0	0	0
alpha-Linolenic acid metabolism	ko00592	1	3	0	0	0	0
Linoleic acid metabolism	ko00591	0	2	0	0	0	0
Fatty acid metabolism	ko01212	0	2	0	0	0	0
Peroxisome	ko04146	0	2	0	0	0	0
Fatty acid biosynthesis	ko00061	0	1	0	0	0	0
Fatty acid elongation	ko00062	0	1	0	0	0	0
Other glycan degradation	ko00511	0	1	0	0	0	0
Isoquinoline alkaloid biosynthesis	ko00950	0	1	0	0	0	0
Tropane, piperidine and pyridine alkaloid biosynthesis	ko00960	0	1	0	0	0	0
Biosynthesis of unsaturated fatty acids	ko01040	0	1	0	0	0	0
